# Supplementary material
Source: PubMed Central journal article supplement (PMC10038102)
Supplement: NIHMS1878279-supplement-amycolimiditide_SI.pdf [file NIHMS1878279-supplement-amycolimiditide_SI.pdf]

## Supporting Information

# Mechanistic analysis of the biosynthesis of the aspartimidylated graspetide amycolimiditide

Brian Choi<sup>†</sup>, Hader E. Elashal<sup>†</sup>, Li Cao<sup>†</sup>, A. James Link<sup>†,‡,§,\*</sup>

<sup>†</sup>Department of Chemical and Biological Engineering, Princeton University, Princeton, NJ 08544, United States

<sup>‡</sup>Department of Chemistry, Princeton University, Princeton, NJ 08544, United States

<sup>§</sup>Department of Molecular Biology, Princeton University, Princeton, NJ 08544, United States

\*Corresponding Author: [ajlink@princeton.edu](mailto:ajlink@princeton.edu)

## Table of Contents

|                                                                                                |    |
|------------------------------------------------------------------------------------------------|----|
| Supplementary Materials and Methods .....                                                      | 3  |
| Supplementary Information on Refactoring Amycolimiditide Biosynthetic Gene Cluster (BGC) ..... | 9  |
| Supplementary Figures .....                                                                    | 11 |
| Supplementary Tables .....                                                                     | 54 |
| References for Supplemental Information .....                                                  | 75 |

## Supplementary Materials and Methods

### Comparative sequence analysis of AmdA homologs

BLASTP was performed on AmdA (WP\_141997876.1) in January 2022, using the Non-redundant protein sequences (nr) database (National Center for Biotechnology Information, NCBI). Of the resulting 33 hits, 3 AmdA homologs from *Salinispora cortesiana* (WP\_025618767.1), *Cryptosporangium phraense* (WP\_142707138.1), and *Cryptosporangium arvum* (WP\_035858693.1) were removed as outliers after manual inspection of their amino acid sequences. Using the resulting list of 30 sequences, WebLogo was used to generate the sequence logos for sites aligning with residues 2-10 and 21-29 of the AmdA core peptide.<sup>1</sup>

### Plasmid Construction

#### General Methodology

Plasmids were constructed by using Golden Gate Assembly on DNA fragments or ligating them after restriction digestion. DNA fragments to be assembled were prepared by PCR, oligonucleotide annealing, or digesting a plasmid with restriction enzymes. After the assembly, *E. coli* transformation was performed for selection and propagation. Plasmids were prepared with Qiaprep Spin Miniprep Kit (Qiagen), and the insert sequences were confirmed by Sanger sequencing (Azenta/Genewiz). All oligonucleotides used and plasmids generated in this study are listed in **Table S2 and S3**, respectively. **Table S4** specifies the construction methodology of all plasmids generated in this study.

#### Strains and Reagents

The genomic DNA of *Amycolatopsis cihanbeyliensis* (DSM 45679) was obtained from the German Collection of Microorganisms and Cell Cultures (DSMZ). PCR amplification was performed with dNTP and Q5 High Fidelity DNA polymerase purchased from New England Biolabs (NEB), and oligonucleotide primers from Integrated DNA Technologies (IDT). Oligonucleotide annealing was performed with T4 polynucleotide kinase (T4 PNK) purchased from NEB. Golden gate assembly, restriction digestion, and ligation were performed with restriction enzymes and T4 DNA ligase purchased from NEB. Chemically competent *Escherichia coli* XL1-Blue (Stratagene) was prepared with *Mix & Go E. coli* Transformation Kit and Buffer Set (Zymo Research). For *E. coli* growth, sterile lysogeny broth (LB) medium (5 g L<sup>-1</sup> yeast extract, 10 g L<sup>-1</sup> tryptone, 10 g L<sup>-1</sup> sodium chloride) containing 100 µg mL<sup>-1</sup> ampicillin (Amp) or 50 µg mL<sup>-1</sup> kanamycin (Kan) was used. For growth on solid LB medium, 15 g L<sup>-1</sup> agar was added.

#### Oligonucleotide Annealing

10  $\mu\text{M}$  of each oligonucleotide was treated with T4 PNK in 1X T4 DNA Ligase Buffer (NEB) for 1 hour at 37 °C. Then, the phosphorylated oligonucleotides were combined and diluted 20-fold in ultrapure water. The diluted oligonucleotide mixture was then heated to 96 °C for 6 minutes and slowly cooled down to 23 °C at a rate of  $-0.1\text{ }^{\circ}\text{C s}^{-1}$ .

### **Golden Gate Assembly (GGA)**

DNA fragments to be assembled were mixed with T4 DNA Ligase and *Bsa*I-HFv2. Thermal cycling was performed according to the manufacturer's protocol with the following modifications. The first 37 °C step was done for 1 minute, the second 16 °C step was done for 30 seconds, the first and second steps were cycled 25 times in total, and an additional 85 °C step was done at the end for 5 minutes.

### **Construction of the Plasmid for Expressing *amdABM***

The amycolimiditide biosynthetic gene cluster *amdABM* was PCR-amplified from *A. cihanbeyliensis* genomic DNA with oBC026 and oBC031. The backbone of pQE-80 was purified after restriction digestion with *Bam*HI and *Hind*III. The PCR product and the pQE-80 backbone were assembled by Golden Gate Assembly, creating the plasmid pBC011.

### **Construction of the Golden Gate Assembly-Enabled pQE-80-Based Vectors**

For more efficient and convenient plasmid construction, we decided to generate a pQE-80-like cloning vector designed to accommodate green fluorescence screening and Golden Gate Assembly. First, we constructed pBC022, in which the *Bsa*I recognition site in AmpR is ablated with a silence mutation and the multicloning site (MCS) of pQE-80L is replaced with the GFP constitutive expression cassette flanked by *Bsa*I recognition sites that generate *Bam*HI and *Hind*III sticky ends upon digestion. The GFP constitutive expression cassette contains the coding sequence of sfGFP (avGFP S30R Y39N F64L S65T Q80R F99S N105T Y145F M153T V163A I171V A206V) under the control of PglpT promoter (Part: jtk2821; BBa\_J72163 from iGEM Registry of Standard Biological Parts). Then, we constructed pBC043, in which the arginine residue of the His<sub>6</sub>-tag was mutated to serine to suppress the background methylation of the N-terminus in *E. coli*.<sup>2</sup> Then, we constructed pBC108, in which the sfGFP was replaced with ffGFP (avGFP S2R S30R Y39N F64L S65T S72A F99S N105T Y145F M153T V163A I171V A206V), which is visibly more fluorescent than sfGFP. Similarly, we constructed pBC052 and pBC133 as entry vectors for *amdABM* and *amdAB* expression, respectively, for *amdA* mutants. In these constructs, the AmdA CDS was replaced with the PglpT-ffGFP constitutive expression cassettes flanked by *Bsa*I recognition sites, with SUMO-AmdB and AmdM coding sequences placed downstream of the second *Bsa*I site.

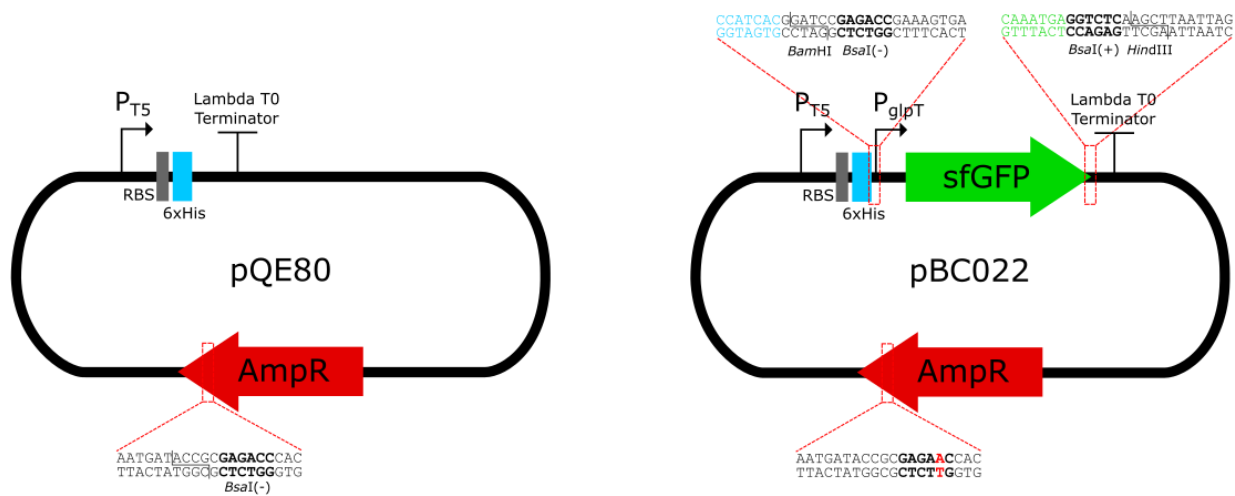

Here, we describe the construction methodology of pBC022. The construction methodology of pBC043, pBC052, pBC108, and pBC133 are outlined in **Table S4**. The P<sub>gfpT</sub> promoter fragment was obtained by overlap-amplifying the primers oBC047, oBC055, oBC056, and oBC057. The superfolder-GFP (sfGFP) fragment was amplified from pWC108 with oBC058 and oBC050. P<sub>gfpT</sub> and sfGFP fragments were overlapped and PCR-amplified with oBC047 and oBC050. The resulting amplicon (*Bam*HI-P<sub>gfpT</sub>-sfGFP-*Hind*III) was digested with *Bam*HI and *Hind*III. The primer pairs oBC043/oBC044 and oBC045/oBC046 were used to PCR-amplify a part of pQE-80 backbone with Amp<sup>R</sup> G239G. The two amplicons were then overlapped and PCR-amplified with oBC043 and oBC046. The resulting amplicon (*Nde*I-pQE-80-Amp<sup>R</sup>\_G239G-*Bam*HI) was digested with *Nde*I and *Bam*HI. The rest of the pQE-80 backbone was obtained by restriction digestion with *Nde*I and *Hind*III (*Hind*III-pQE-80-*Nde*I). The purified fragments *Nde*I-pQE-80-Amp<sup>R</sup>\_G239G-*Bam*HI, *Bam*HI-P<sub>gfpT</sub>-sfGFP-*Hind*III, and *Hind*III-pQE-80-*Nde*I were ligated together.

### Gene Expression in *E. coli*

*E. coli* BL21 (DE3)  $\Delta$ *slyD* was electroporated with a plasmid containing the gene(s) to be expressed. The transformants were grown overnight at 37 °C on the solid LB agar medium containing Amp/Kan. A single colony was grown overnight at 37 °C in the liquid LB+Amp/Kan medium with shaking at 250 rpm. Then, the starter culture was added to a larger liquid LB+Amp/Kan medium so that OD<sub>600</sub> = 0.02. The cells were grown at 37 °C with 250 rpm shaking until OD<sub>600</sub> = 0.5, and expression was induced by adding IPTG to 1 mM concentration. Afterwards, the culture was transferred to a benchtop shaker and continued to grow at room temperature (20-22 °C) with 250 rpm shaking for 20 hours. For the co-expression AmdA or its variant with SUMO-AmdB and AmdM, the cells were grown for 24 hours after the IPTG induction.

## **Protein Native Purification**

The culture grown for SUMO-AmdB or AmdM purification was centrifuged at 4,000 x g for 15 min. Per 500 mL culture, the cell pellet was resuspended in 10 mL 50 mM NaH<sub>2</sub>PO<sub>4</sub>, 300 mM NaCl, 10 mM imidazole, pH 8.0. 1 mg/mL lysozyme was added to the resuspended cells, followed by incubation while rotating at 4 °C for 20 min. The cells were lysed by sonication on ice for 12 cycles (10 s on, 20 s off). The lysate was centrifuged at 12,000 x g for at least 30 minutes. The clarified lysate was mixed with 1 mL Ni-NTA resin (Qiagen) and incubated while rotating at 4 °C for 1 hour. The mixture was passed through an empty gravity column, followed by the first wash with 10 mL 50 mM NaH<sub>2</sub>PO<sub>4</sub>, 300 mM NaCl, 20 mM imidazole, pH 8.0, the second wash with 10 mL 50 mM NaH<sub>2</sub>PO<sub>4</sub>, 300 mM NaCl, 35 mM imidazole, pH 8.0, and the third wash with 10 mL 50 mM NaH<sub>2</sub>PO<sub>4</sub>, 300 mM NaCl, 50 mM imidazole, pH 8.0. Then, the protein was eluted with a total of 8 mL 50 mM NaH<sub>2</sub>PO<sub>4</sub>, 300 mM NaCl, 250 mM imidazole, pH 8.0, collecting 1 mL fraction at a time. After analyzing the fractions with SDS-PAGE, the clean elution fractions were pooled, buffer exchanged into 1X PBS, pH 7.4 containing 10% glycerol, and concentrated using a 30 kDa Amicon concentrator. The purified proteins were stored at -80 °C.

## **Protein Denaturing Purification**

The culture grown for purifying AmdA or its variants was centrifuged at 4,000 x g for 15 min. Per 500 mL culture, the cell pellet was resuspended in 10 mL 100 mM NaH<sub>2</sub>PO<sub>4</sub>, 10 mM Tris, 8 M urea, pH 8.0. After freezing at -80 °C and thawing at room temperature in water bath, the cell lysate was centrifuged at 12,000 x g for at least 30 minutes. The clarified lysate was mixed with 1 mL Ni-NTA resin (Qiagen) and incubated while rotating at 4 °C for 1 hour. The mixture was passed through an empty gravity column, followed by the first wash with 10 mL 100 mM NaH<sub>2</sub>PO<sub>4</sub>, 10 mM Tris, 8 M urea, pH 6.3, and the second wash with 10 mL 100 mM NaH<sub>2</sub>PO<sub>4</sub>, 10 mM Tris, 8 M urea, pH 5.9. Then, the protein was eluted with a total of 8 mL 100 mM NaH<sub>2</sub>PO<sub>4</sub>, 10 mM Tris, 8 M urea, pH 4.5, collecting 1 mL fraction at a time. After analyzing the fractions with SDS-PAGE, the clean elution fractions were pooled, buffer exchanged into 1X PBS, pH 7.4, and concentrated using a 10 kDa Amicon concentrator. The purified proteins were stored at -80 °C.

## **Trypsin Digestion**

AmdA or its variant was digested with trypsin to cleave the leader peptide. The purified protein was mixed with sequence grade trypsin (Promega) at a 100:1 w/w protein:trypsin ratio in 50 mM NH<sub>4</sub>HCO<sub>3</sub>. For the preparation of the amycolimidite NMR sample, 500:1 w/w protein:trypsin ratio was used. For proteins expected to contain an aspartimide, the NH<sub>4</sub>HCO<sub>3</sub> buffer was acidified to pH 7 with HCl prior to mixing with the protein and trypsin. The digestion was done at 37 °C for 30 min and then quenched by adding 1% formic acid.

## Peptide purification by HPLC

Semi-preparative reverse-phase HPLC was performed on trypsin-digested AmdA or AmdA variant to purify its putative core peptide. An Agilent 1200 series instrument equipped with a Zorbax 300SB-C18 (9.4 mm x 250 mm, 5  $\mu$ m) column and a 215 nm UV detector was used. The elution gradient with a mixture of water and acetonitrile with 0.1% trifluoroacetic acid flowing at a rate of 4 mL/min was used. The following linear gradients were used: 10% acetonitrile for 1 min, 10-75% acetonitrile over 19 min, 75-90% acetonitrile over 5 min, 90% acetonitrile for 5 min, and 90-10% acetonitrile over 2 min. The peak corresponding to the desired peptide was collected, frozen at -80 °C, lyophilized (Labconco FreeZone Freeze Dry System), and resuspended in ultrapure water for subsequent studies.

## Mass spectrometry

All protein and peptide mass spectra were acquired using electrospray ionization (ESI) on an Agilent 6530 QTOF equipped with an Agilent 1260 LC system. Peptides from digested proteins or purified from HPLC were chromatographed on a Zorbax 300SB-C18 (2.1 mm x 50 mm, 3.5  $\mu$ m particle size), and intact proteins were chromatographed on an XBridge Protein BEH C4 (Waters, 2.1 mm x 50 mm, 3.5  $\mu$ m particle size). The elution gradient with a mixture of water and acetonitrile with 0.1% formic acid flowing at a rate of 0.5 mL/min was used. For peptides, the following linear gradients were used: 5% acetonitrile for 1 min, 5-45% acetonitrile over 20 min, 45-90% acetonitrile over 5 min, and 90% acetonitrile for 5 min. For intact proteins, the following linear gradients were used: 10% acetonitrile for 1 min, 10-50% acetonitrile over 20 min, 50-90% acetonitrile over 5 min, and 90% acetonitrile for 5 min. The instrument was calibrated using "Mass Calibration/Check" daily. Data were analyzed using MassHunter (Agilent). For MS/MS, the instrument was calibrated using "Standard Tune" prior to mass spectra acquisition. Data were analyzed using MassHunter and mMass.

## Amycolimiditide NMR

*amdABM* (pBC105) was expressed in *E. coli* BL21 (DE3)  $\Delta$ *slyD* using 16 L of LB+Amp medium. mAmdA<sup>BM</sup> was purified in denaturing conditions and digested with trypsin as described above. Amycolimiditide was purified from the trypsinized mAmdA<sup>BM</sup> by HPLC. 3.8 mM amycolimiditide was prepared in 95/5 H<sub>2</sub>O/D<sub>2</sub>O. 2D NMR spectra (TOCSY, NOESY, <sup>1</sup>H-<sup>13</sup>C HSQC, <sup>1</sup>H-<sup>13</sup>C HMBC) of amycolimiditide were collected on a Bruker Avance III 800 MHz spectrometer at 293 K. The mixing time for the TOCSY was 80 ms while two NOESY spectra were acquired with 150 ms and 700 ms mixing times. HMBC was acquired targeting 10 Hz proton-carbon coupling. The acquired spectra were processed and analyzed using MestReNova. Proton and carbon resonances were assigned to the structure manually (**Table S6**). The NOESY spectrum acquired with 150 ms mixing time was used to determine through space distance restraints, which was used to build the amycolimiditide structural model in CYANA 2.1. Additional geometric restraints corresponding to the  $\omega$ -esters and the aspartimide were added to CYANA 2.1.

The top 20 structures were energy-minimized using Avogadro's MMFF94 forcefield. The coordinates for amycolimidite have been deposited in PDB (8DYM) and BMRB (31036).

### **Circular Dichroism (CD)**

CD was performed on the following three samples: The unmodified AmdA core peptide, pre-amycolimidite, and amycolimidite. For the unmodified AmdA core peptide, the unmodified AmdA protein was purified under denaturing conditions after expressing *amdA* from pBC054. The purified protein was trypsinized, and the resulting C-terminal 29-aa fragment was purified by HPLC. Pre-amycolimidite was prepared similarly after expressing *amdAB* from pBC045, and amycolimidite was prepared similarly after expressing *amdABM* from pBC051. After freeze-drying, all three peptides were individually reconstituted in ultrapure water at 0.1 mg/ml concentration, as determined by  $A_{280}$  measurements. The Applied Photophysics Chirascan instrument was used to collect the CD spectra of the three peptide samples, scanning from 180-280 nm in a 1 mm pathlength cuvette (Hellma Analytics).

### **Hydrazinolysis**

4 M hydrazine was prepared in 1X PBS buffer at pH 5.0. Per 25  $\mu$ L of this hydrazine solution, 1  $\mu$ L of 6 M HCl was added to bring the pH to about 7-8. This solution was mixed with a sample of HPLC-purified peptide in a 1:1 volumetric ratio. The mixture was incubated at 55 °C for 45 min and immediately subjected to mass spectrometry.

### ***In vitro* reconstitution of enzymatic reactions**

For the *in vitro*  $\omega$ -ester crosslinking with the ATP-grasp enzyme, the reaction mixture contained the following: 10  $\mu$ M His<sub>6</sub>-AmdA (or variant), 1  $\mu$ M His<sub>6</sub>-SUMO-AmdB, 10 mM ATP (Sigma-Aldrich, A2383), and 10 mM MgCl<sub>2</sub> in 1X PBS, pH 7.4. Prior to adding ATP to the reaction mixture, 100 mM ATP solution was prepared in water and brought to pH 7, as indicated by a Fisherbrand pH indicator strip, with NaOH. For the *in vitro* aspartimidylation with the O-methyltransferase, the reaction mixture contained the following: 10  $\mu$ M substrate (His<sub>6</sub>-mAmdA<sup>B</sup>, pre-amycolimidite, iso pre-amycolimidite, or a variant), 1  $\mu$ M His<sub>6</sub>-AmdM, and 400  $\mu$ M SAM in 1X PBS, pH 7.4. For any reaction with AmdA variants containing a disulfide bond, 10 mM DTT was added to the reaction mixture if the reduction of the disulfide bond was desired. All reactions were performed at room temperature. For time course studies, a fraction of the reaction mixture was mixed with 1% formic acid to quench the reaction. The reactions were analyzed by mass spectrometry. For the time course *in vitro* aspartimidylation reactions, EICs for the pre-aspartimidylated, methylated, and aspartimidylated states were obtained, and the peaks-of-interest were integrated. The percentage of each species was calculated as the ratio of the peak area of the species-of-interest to the sum of all three peak areas.



Then, the ratio was multiplied by the concentration of the pre-aspartimidylated species at  $t = 0$  (10  $\mu\text{M}$ ) to obtain the concentration of each species at a given time.

## Supplementary Information on Refactoring Amycolimiditide Biosynthetic Gene Cluster (BGC)

Initially, we expressed *amdA*, *amdAB*, and *amdABM* from the pQE-80L vector, placing the AmdA coding sequence downstream of the His<sub>6</sub>-tag, MRGSHHHHHHGS, and using the native coding sequences of AmdB and AmdM. The *amdA* expression resulted in the purified AmdA protein with two masses, 13,712 Da and 13,726 Da, corresponding to the unmodified AmdA and one-fold methylated AmdA, respectively (Fig. S3A). Expressing *amdAB* resulted in the purified mAmdA<sup>B</sup> protein with several masses, seemingly corresponding to AmdA with 0-4-fold dehydrations and 0-1-fold methylation (Fig. S3B). Similarly, expressing *amdABM* resulted in the purified mAmdA<sup>BM</sup> protein with mass profiles corresponding to AmdA with 0-5-fold dehydrations and 0-1-fold methylation (Fig. S3C). For mAmdA<sup>B</sup> and mAmdA<sup>BM</sup>, the masses of the intermediates deviate slightly from the expected masses of 1-3-fold and 1-4-fold dehydrated AmdA, respectively, probably due to the presence of the methylated species that further complicate the mass distributions of AmdA species. For example, the third rightmost mass peak (13,691 Da) for mAmdA<sup>B</sup> from *amdAB* expression from pQE-80L (Fig. S3B) is probably averaged by the 1-fold dehydrated AmdA and the 2-fold dehydrated and methylated AmdA.

The significant amounts of intermediates resulting from *amdAB* and *amdABM* expressions suggest that AmdB cannot efficiently modify AmdA to completion, leading us to suspect that His<sub>6</sub>-AmdB is unstable *in cellulo*. We natively purified His<sub>6</sub>-AmdB, and the protein precipitated within a few hours during storage at 4 °C. We circumvented this problem by immediately buffer-exchanging the eluted protein in 1X PBS, pH 7.4 with 10% glycerol. The protein was not precipitated by the time it transferred to the -80 °C freezer for storage. However, upon thawing for usage in the *in vitro* AmdA modification experiments, AmdB precipitated out. As such, it seems that His<sub>6</sub>-AmdB is especially prone to aggregation *in vitro*, and this behavior may carry over *in vivo*. Following this observation, we predicted that improving the solubility/stability of AmdB would enhance the efficiency of AmdB activity in *E. coli*. To do so, we fused AmdB with an N-terminal SUMO-tag, which is known to enhance the solubility of the fused protein.<sup>3</sup> Indeed, expressing *amdAB* and *amdABM* with SUMO-AmdB resulted in significant improvements in the conversion to 4-fold dehydrated mAmdA<sup>B</sup> and 5-fold dehydrated mAmdA<sup>BM</sup>, as indicated by the absence of intermediate peaks (Fig. S3D, E). However, most products remained methylated.

Even with the significant improvement in the AmdB activity, the methylation still complicates our analysis of the mass spectrometry data. For example, the 13,635 Da peak from AmdA co-expression with SUMO-AmdB and AmdM (Fig. S3E) is likely to be an average of 5-fold dehydrated and methylated AmdA and 4-fold dehydrated AmdA,

and it is difficult to distinguish between those two species by mass spectrometry. Therefore, we sought to eliminate the methylation on AmdA to improve the interpretability of the mass spectrometry data. According to the literature, a group of proteins containing IF-3, L33, L11, and rMalarial antigen with Lys or Arg as the second residue become methylated, and arginine as the second residue of a protein is known to block the N-terminal methionine excision activity of methionine aminopeptidase (MAP).<sup>2, 4</sup> Our observations with the original AmdA constructs are consistent with these findings from the literature: The second residue of the N-terminal His<sub>6</sub>-tag for AmdA is arginine, and the N-terminal methionine is not cleaved. Suspecting the N-terminus of AmdA is methylated, we substituted the second residue of the N-terminal His<sub>6</sub>-tag into Ser. In the new AmdA constructs with the modified His<sub>6</sub>-tag, the N-terminal methionine was excised, and no methylation was observed (refer to Fig. 2A in the main text).

For the final *amdABM* expression construct, we changed the start codon of *amdM* into atg (originally gtg). While 20 hours of *amdAB* expression was sufficient for complete conversion to mAmdA<sup>B</sup>, 24 hours of *amdABM* expression was required for complete conversion to mAmdA<sup>BM</sup>.

## Supplementary Figures

|                |                                                           |
|----------------|-----------------------------------------------------------|
| WP 141997876.1 | PADIGYDEDAQMGLMRDDGGQLVPMRHTDGGQNTNTVTDGGDGRYTNKDSDDHRED  |
| MPZ83135.1     | PADIGYDENAQVGLIRDDDGQLVRMGRHTDGGQGTVTDKGDGQSTNKDSDDHRED   |
| MBV9314006.1   | PADLVYDEQNQVGLIRDG-DELIKMRHTDGGQNTNTQTN-ADGQ-NGPDSDDWRED  |
| WP 132875576.1 | LAELSYDEEAQVGLLRHG-GELVRLGRHTDGGQNTNTQTN-SDGH-QGYDSDDHRED |
| PZS38665.1     | PAELGHDDVRKIGLIREGGKEMVPLSKHSDGSTSTLTD-ADGH-GGRDSDDHRED   |
| MBV9010918.1   | PGELGYDDIRQVGLIRDG-REMVPLARHTDGGQNTLTLN-ADGH-GGYDSDDWRED  |
| WP 207125195.1 | LEALSYPDTERQIALIRDG-SQVPLARHTDGRSTSTASRDGT--PQDGDSDVRED   |
| BCJ32534.1     | LDALSYDADRQIGLIHDG-DQVPLARHTDGRSTTTASRDGT--PQDGDADVRED    |
| GID14923.1     | VNALSYDTHRQVGMIRDG-EELVPLARHTDGRSTTTASRDGT--PQDGEDTRED    |
| WP 203662960.1 | VNALSYDTHRQVGMIRDG-EELVPLARHTDGRSTTTASRDGT--PQDGEDTRED    |
| WP 203965230.1 | LDALSYDADRQIGLIHDG-DQVPLARHTDGRSTTTASRDGT--PQDGDADVRED    |
| MBN1173025.1   | LSHYGYDHDQQIGVLHTE-QGTVPLARHTTGQTRTVTH-PDGH-RGPDSDDVRED   |
| WP 221083949.1 | LSAYGYDHDQQIGTVRDG-DTVVPLMRHTTGQSTTTN-ADGH-KGPDSDDHRED    |
| OJF13460.1     | LTTVRYDPRQMAVDTTG-AP--VLGKHSTGATSTRTS--DGHKS-MDSDDHRED    |
| MBT8225494.1   | LDRYGYDHRQIGVVHTH-SGAVPLARHTTGQTRTVAH-PDGH-RGPDSDDVRED    |
| WP 211277811.1 | LTTVRYDPRQMAVDTTG-AP--VLGKHSTGATSTRTS--DGHKS-MDSDDHRED    |
| WP 018831371.1 | LTTVRYDPRQMSVDPTG-TP--VLGKHSTGATSTRTS--DGHKS-MDSDDHRED    |
| WP 027661194.1 | LTTVRYDPRQMSVDPTG-TP--VLGKHSTGATSTRTS--DGHKS-MDSDDHRED    |
| WP 028193085.1 | LTTVRYDPRQMSVDPTG-TP--VLGKHSTGATSTRTS--DGHKS-MDSDDHRED    |
| WP 019900531.1 | LTTVRYDPRQMSVDRTG-TP--VLGKHSTGATSTRTS--DGHKS-MDADTDHRED   |
| ABP54871.1     | LTTVRYDPRQMSVDPTG-TP--VLGKHSTGATSTRTS--DGHKS-MDSDDHRED    |
| WP 028565500.1 | LTTVRYDPRQMSVDPTG-TP--VLGKHSTGATSTRTS--DGHKS-MDSDDHRED    |
| MPZ85240.1     | FSSWDYDPRQIAVVTED-GSRIEAAKHSTGPTQTPN--TGDGTRFERDEDVRED    |
| WP 018790314.1 | LTTVRYDPRQMSVDRTG-TP--VLGKHSTGATSTRTS--DGHKS-MDADTDHRED   |
| NIL43132.1     | LTTVRYDPRQMSVDPTG-TP--VLGKHSTGATSTRTS--DGHKS-MDADTDHRED   |
| WP 029024809.1 | LTTVRYDPRQMSVDRTG-TP--VLGKHSTGATSTRTS--DGHKS-MDADTDHRED   |
| TQL38569.1     | LTTVRYDPRQMSVDRTG-TP--VLGKHSTGATSTRTS--DGHKS-MDADTDHRED   |
| MBI1759089.1   | LSAYGYDHRQIGVIRDG-DQEVPLKHTTGQTRTTN-PDGH-KGPDSDDVRED      |
| WP 038841753.1 | LTTVRYDPRQMSVDRTG-TP--VLGKHSTGATSTRTS--DGHKS-MDADTDHRED   |
| NYT94749.1     | LTTVRYDPRQMSVDPTG-TP--VLGKHSTGATSTRTS--DGHKS-MDSDDHRED    |

**Figure S1:** ClustalW alignment of AmdA and its 29 homologs. Left: The protein accession numbers. The first row represents AmdA (WP 141997876.1);right: the C-terminal ends of the corresponding sequences. The shaded region represents the DG that is conserved amongst the precursors and is likely to be an aspartimidylation site.

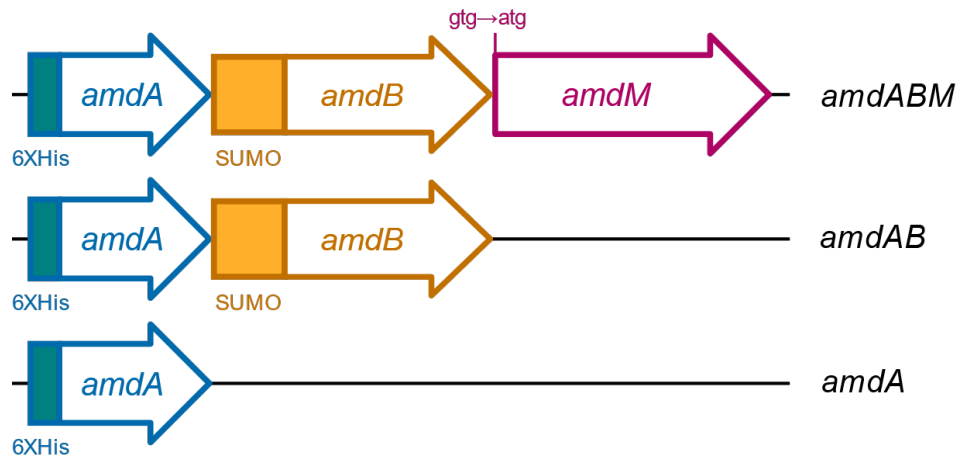

**Figure S2:** The architecture of the modified *amdABM*, *amdAB*, and *amdA* BGCs used for heterologous expression in *E. coli*. The His<sub>6</sub>-tag (MSGSHHHHHHGS) is fused upstream to the coding sequence of AmdA. The SUMO-tag is fused upstream to the coding sequence of AmdB. The start codon of *amdM* was modified from *gtg* to *atg*.

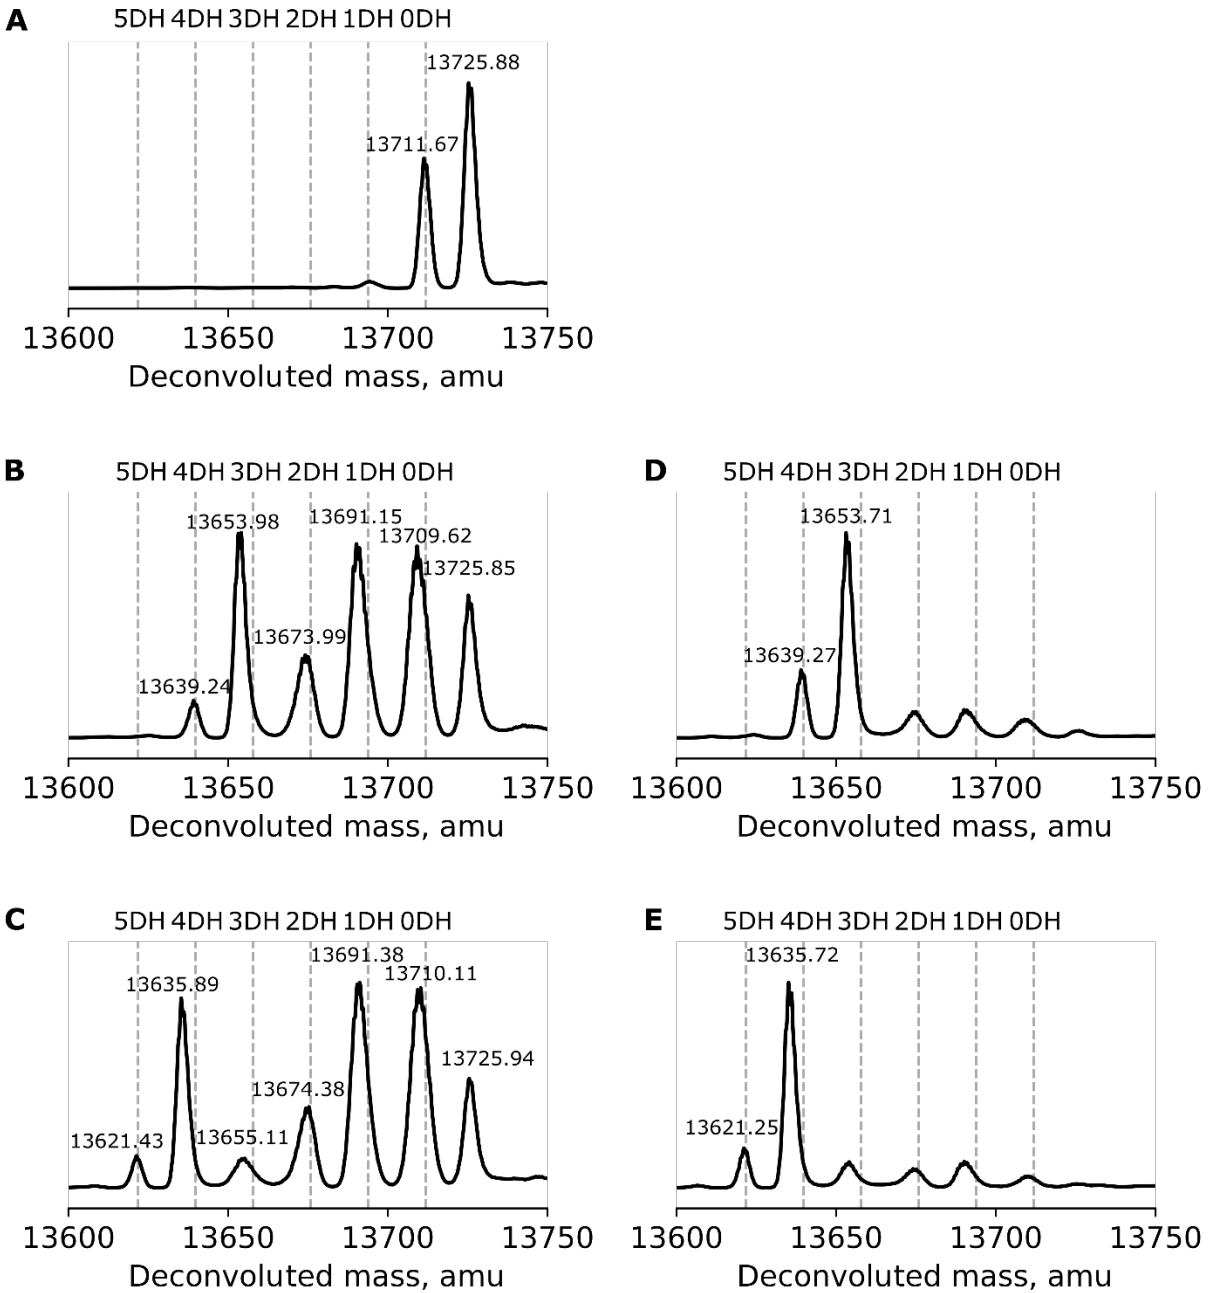

**Figure S3:** Deconvoluted mass spectra of the purified AmdA proteins with the original His<sub>6</sub>-tag (MRGSHHHHHHGS). The grey dotted lines represent the theoretical average masses of the unmodified AmdA (0DH) and AmdA 1-5-fold dehydrated (1-5DH). **(A)** The unmodified AmdA; **(B)** mAmdA<sup>B</sup> from AmdA co-expressed with AmdB; **(C)** mAmdA<sup>BM</sup> from AmdA co-expressed with AmdB and AmdM; **(D)** mAmdA<sup>B</sup> from AmdA co-expressed with SUMO-AmdB; **(E)** mAmdA<sup>BM</sup> from AmdA co-expressed with SUMO-AmdB and AmdM. Co-expressing AmdA with SUMO-AmdB noticeably improves the yield of the completely modified AmdA. Most species of AmdA appear to contain nonspecific methylation.

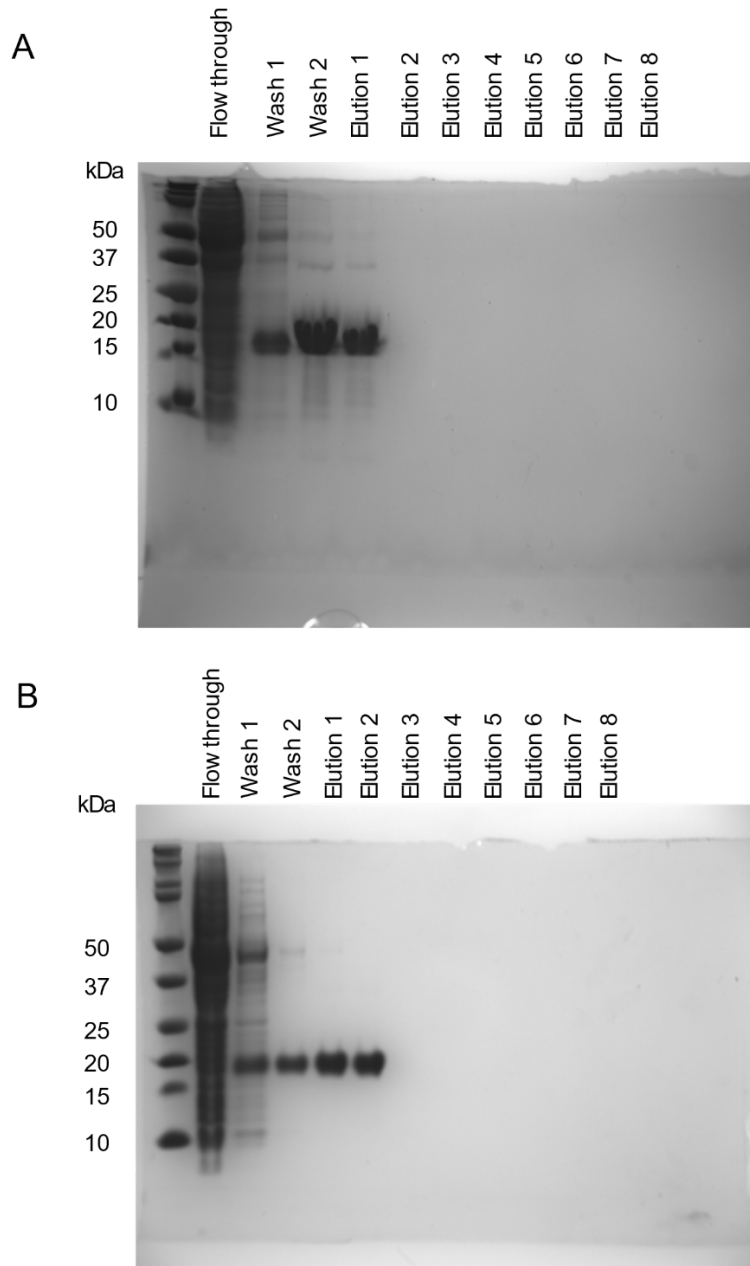

**Figure S4:** SDS-PAGE analysis of Ni-NTA urea-denaturing purification of **(A)** mAmdA<sup>B</sup> and **(B)** mAmdA<sup>BM</sup>. Flow through lane corresponds to *E. coli* cell lysate flow through after 1 hr incubation with Ni resin. Wash 1 corresponds to the first 10 mL wash of the resin with 8 M urea buffer, pH 6.3. Wash 2 corresponds to the second wash (10 mL) with 8 M urea buffer, pH 5.9. Each elution lane corresponds to 1 mL fractions eluted with 8 M urea buffer, pH 4.5.

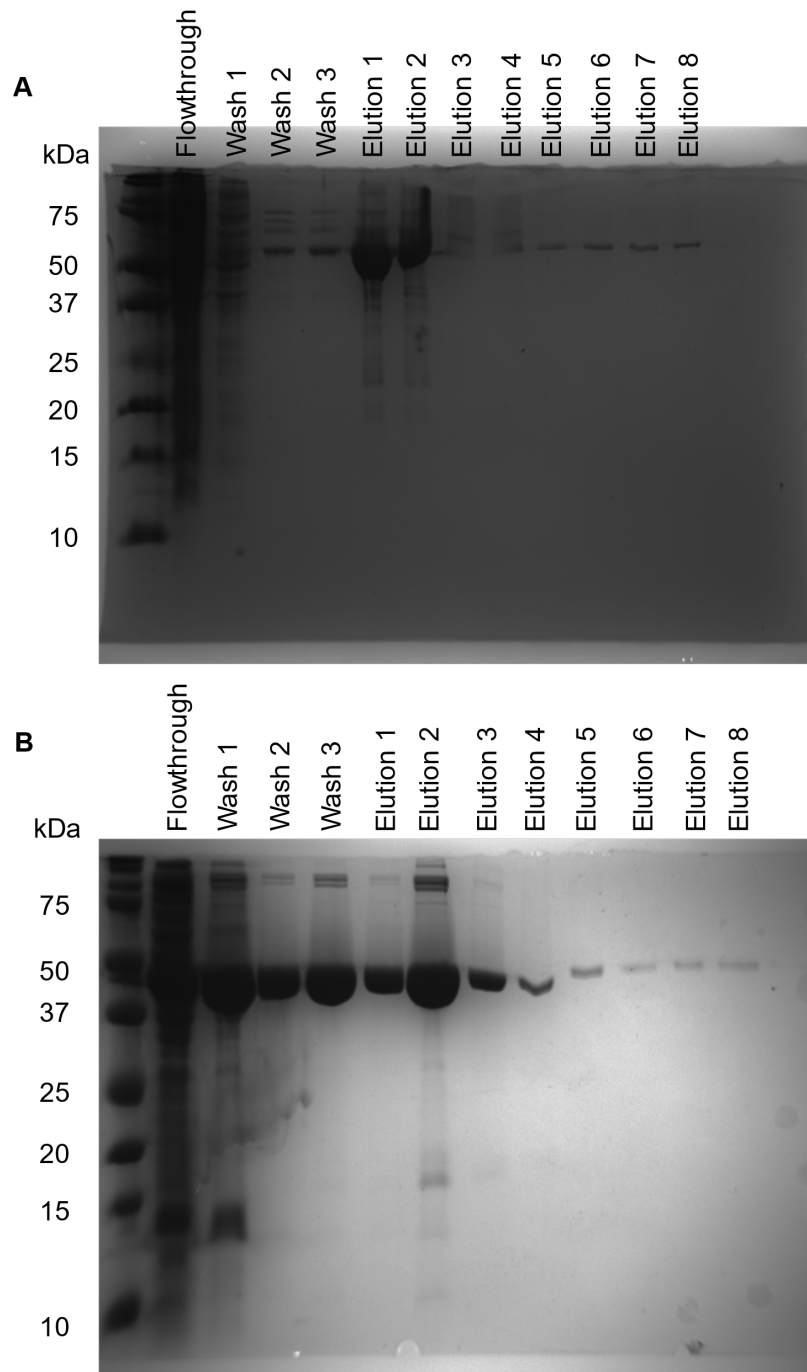

**Figure S5:** SDS-PAGE analysis of Ni-NTA native purification of **(A)** His<sub>6</sub>-SUMO-AmdB and **(B)** His<sub>6</sub>-AmdM. Flow through lane corresponds to *E. coli* cell lysate flow through after 1 hr incubation with Ni-NTA resin. Wash 1, 2, 3 corresponds to the 10 mL washes of the resin with buffer at pH 8.0 containing 50 mM NaH<sub>2</sub>PO<sub>4</sub>, 300 mM NaCl, and 20 mM, 35 mM, and 50 mM imidazole, respectively. Each elution lane corresponds to 1 mL fractions eluted with the same buffer containing 250 mM imidazole.

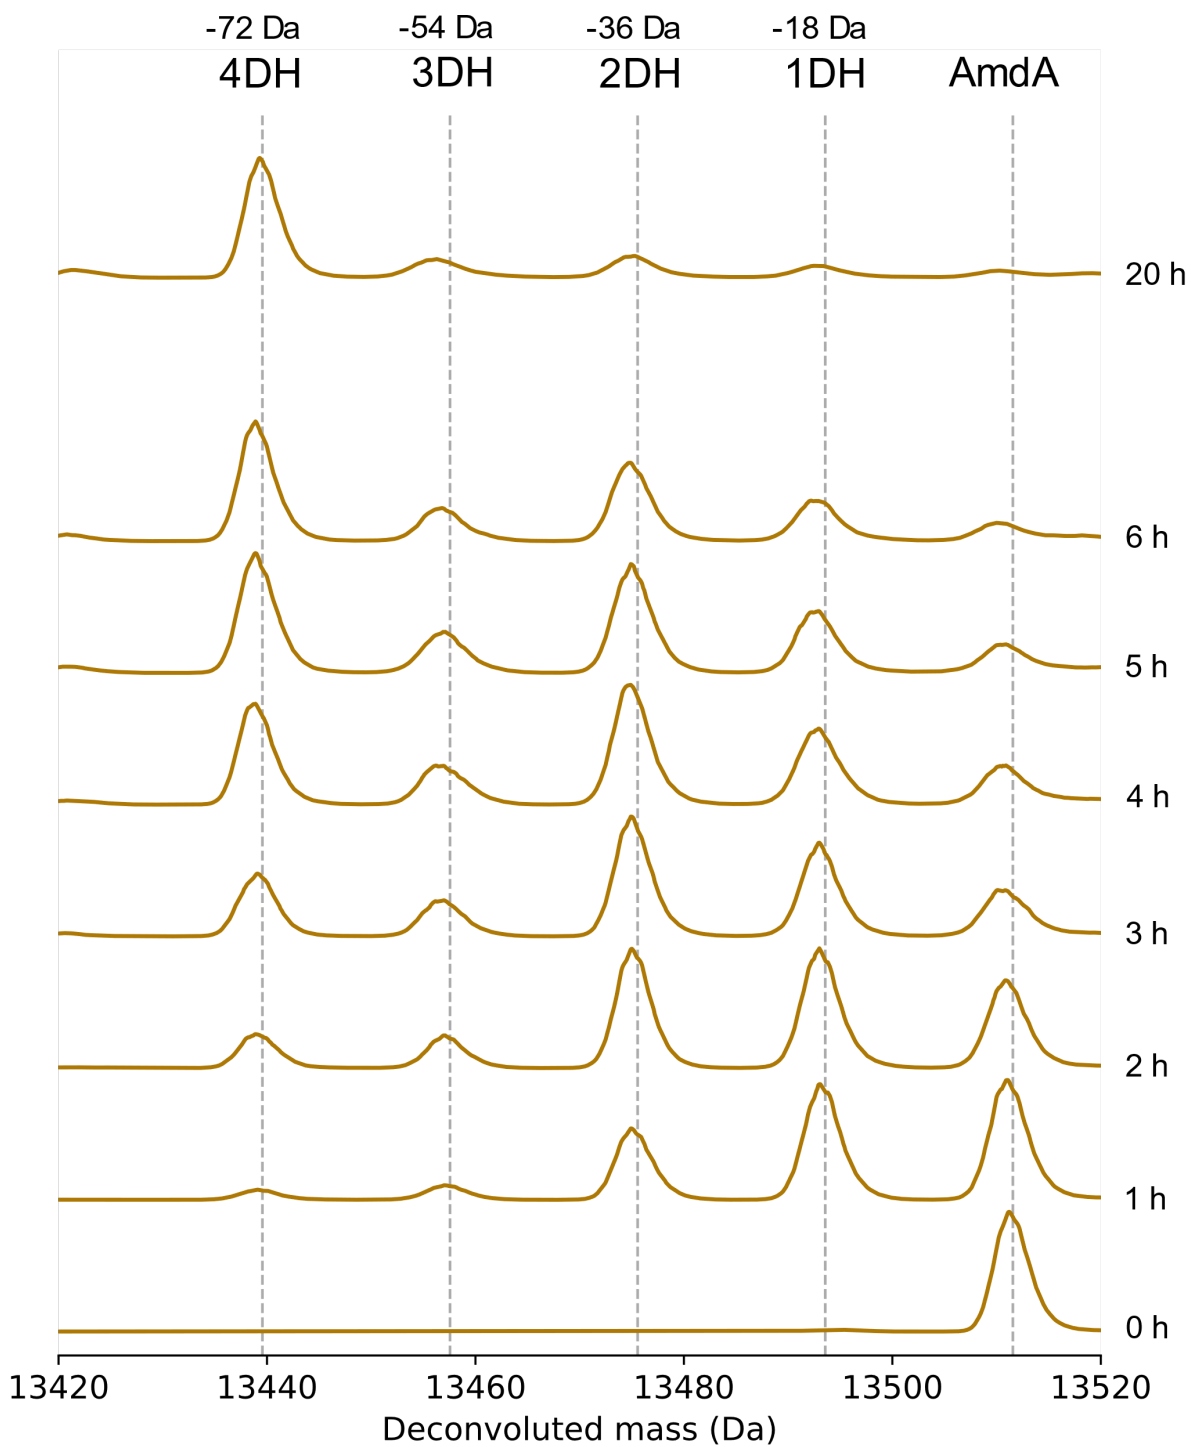

**Figure S6:** *In vitro* His<sub>6</sub>-SUMO-AmdB-modification of AmdA. Over the course of 20 hours at room temperature, almost all AmdA becomes quadruply dehydrated, showing a near-complete conversion into mAmdA<sup>B</sup>.



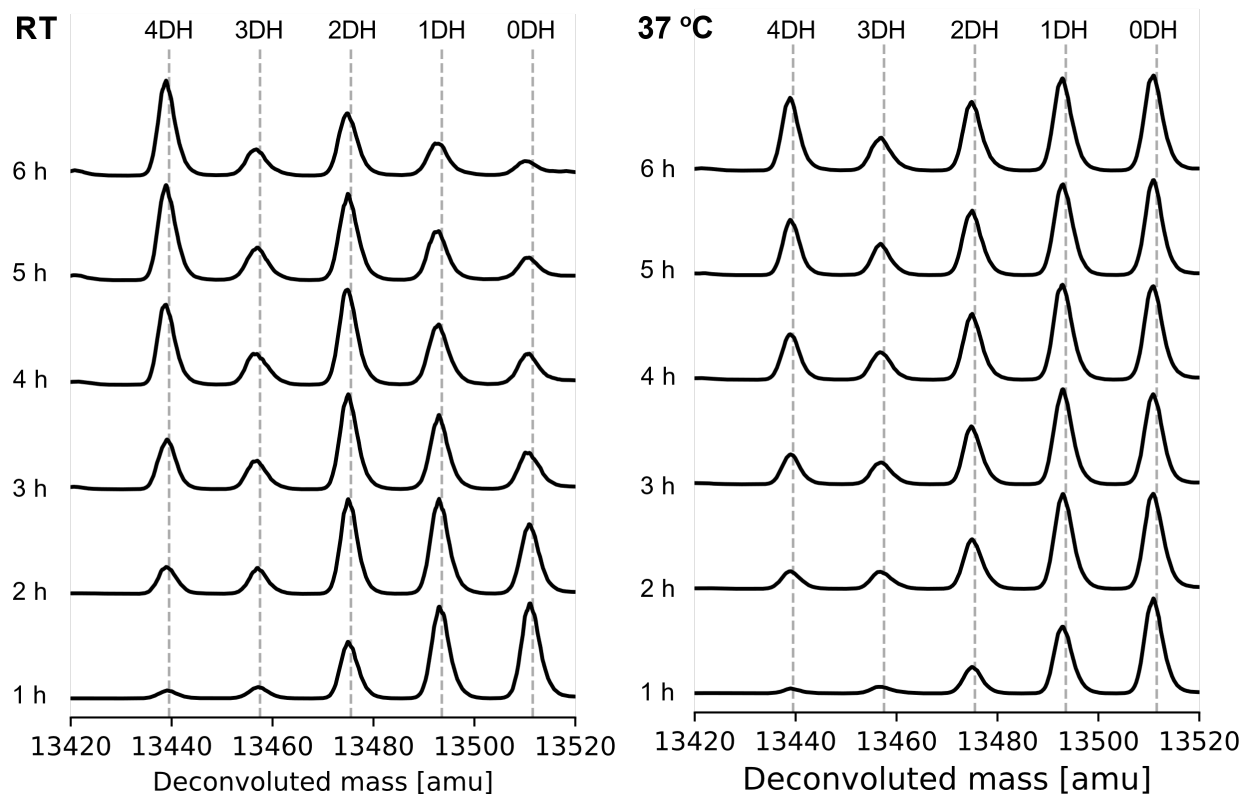

**Figure S7:** Comparison of *in vitro* His<sub>6</sub>-SUMO-AmdB modification of AmdA at **(A)** room temperature (same experimental result as shown in Fig. S6) and **(B)** 37 °C. The reaction is significantly slower at 37 °C than at room temperature.

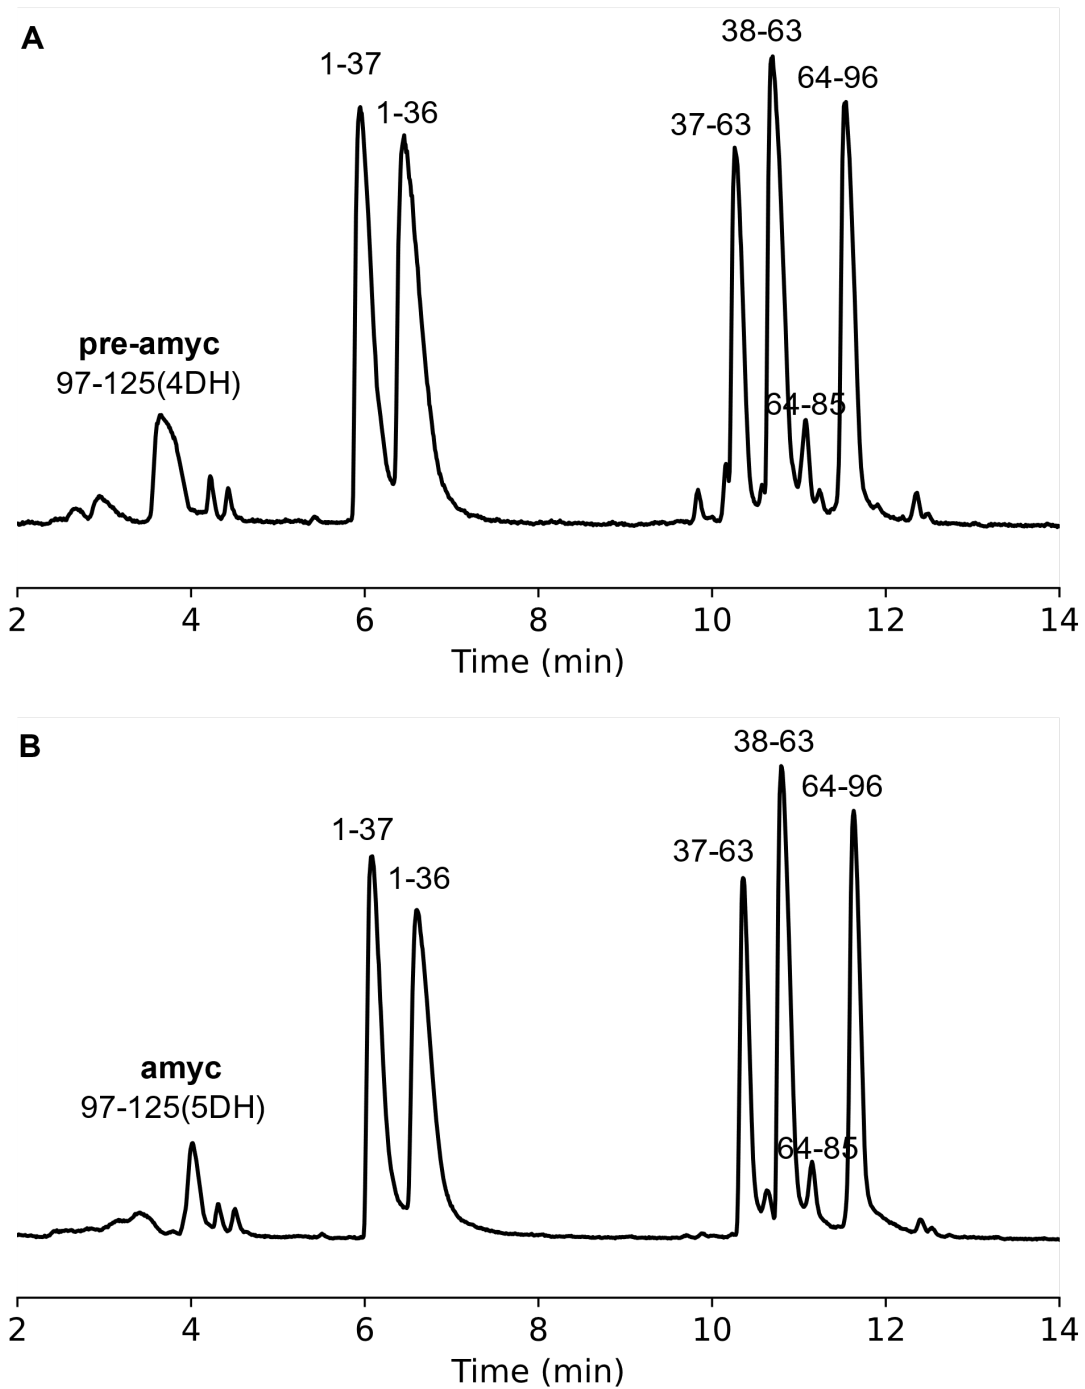

**Figure S8:** Total ion current chromatograms of trypsin-digested **(A)** mAmdA<sup>B</sup> and **(B)** mAmdA<sup>BM</sup>. The numbers above the peaks correspond to the specific peptide within mAmdA<sup>B</sup> or mAmdA<sup>BM</sup>. While the leader peptides (residues 1-96) fragment and chromatograph similarly, pre-amycolimiditide and amycolimiditide (residues 97-125) chromatograph at different retention times, at 3.6 min and 4.0 min, respectively.

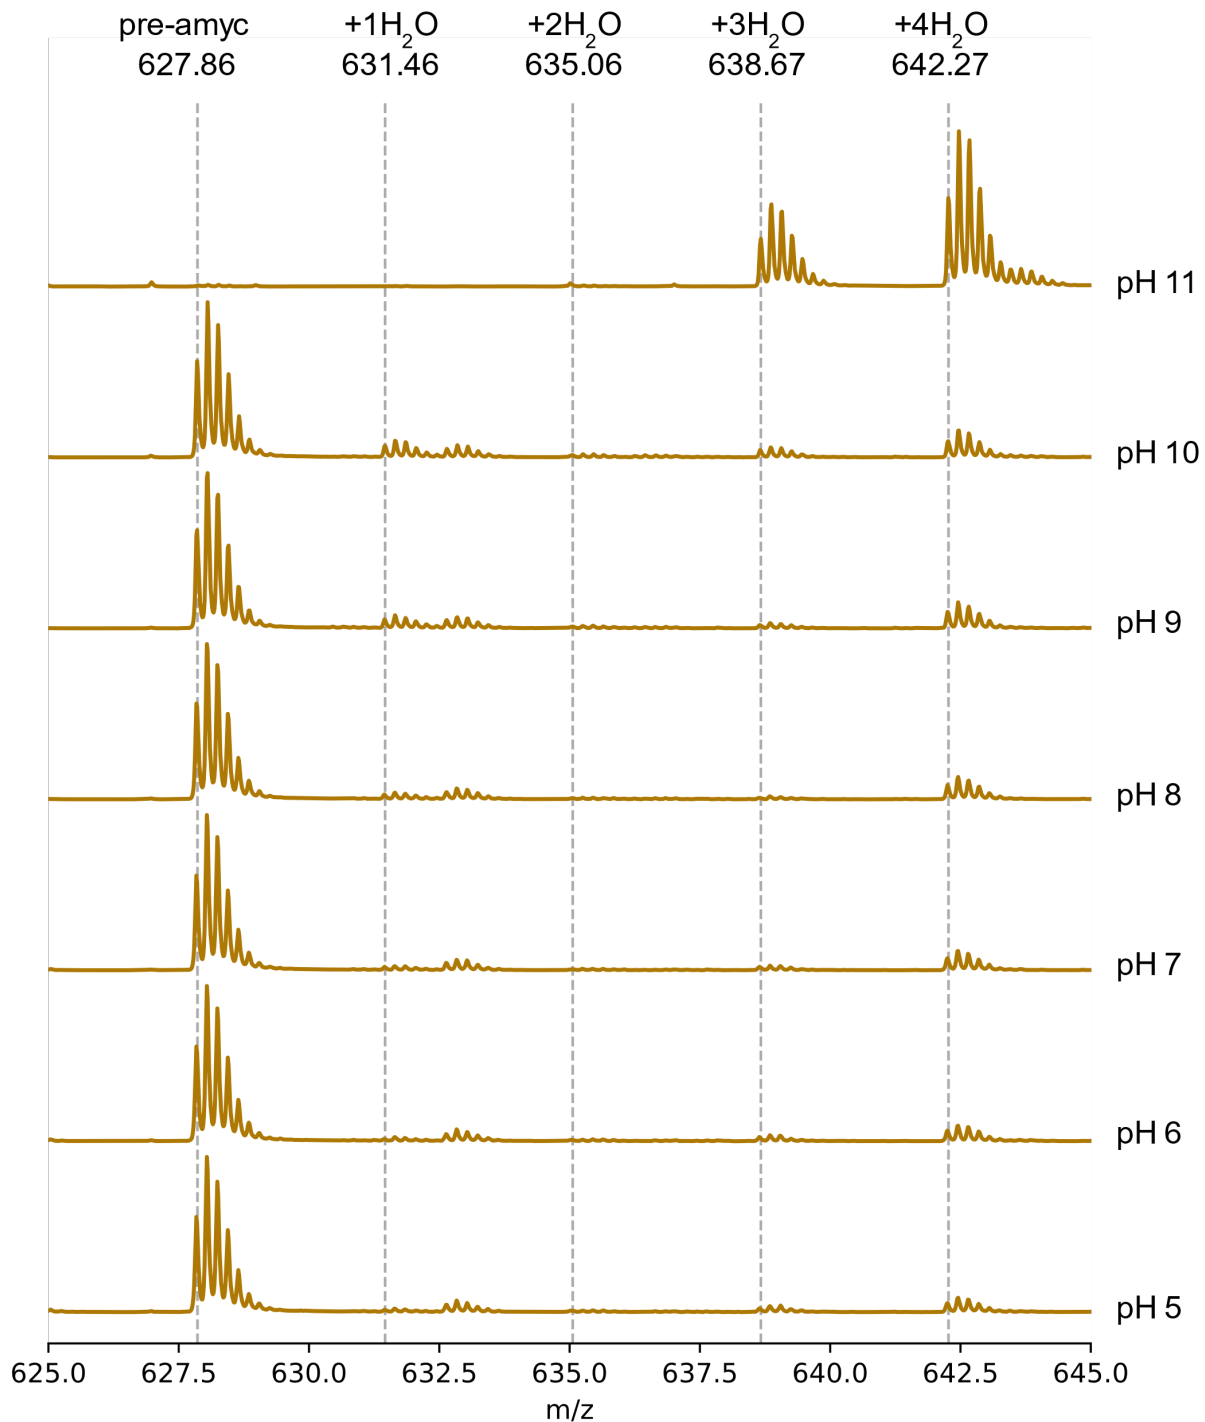

**Figure S9:** Hydrolysis of pre-amycolimidite at various pH values. The +5 charge state is shown. 10  $\mu$ M peptide was incubated in a 1X PBS buffer at room temperature for 30 hours. HCl or NaOH was used to change the pH of the buffer. All four dehydrations of pre-amycolimidite installed by AmdB are undone at pH 11, suggesting the presence of four ester linkages and no amide crosslink.

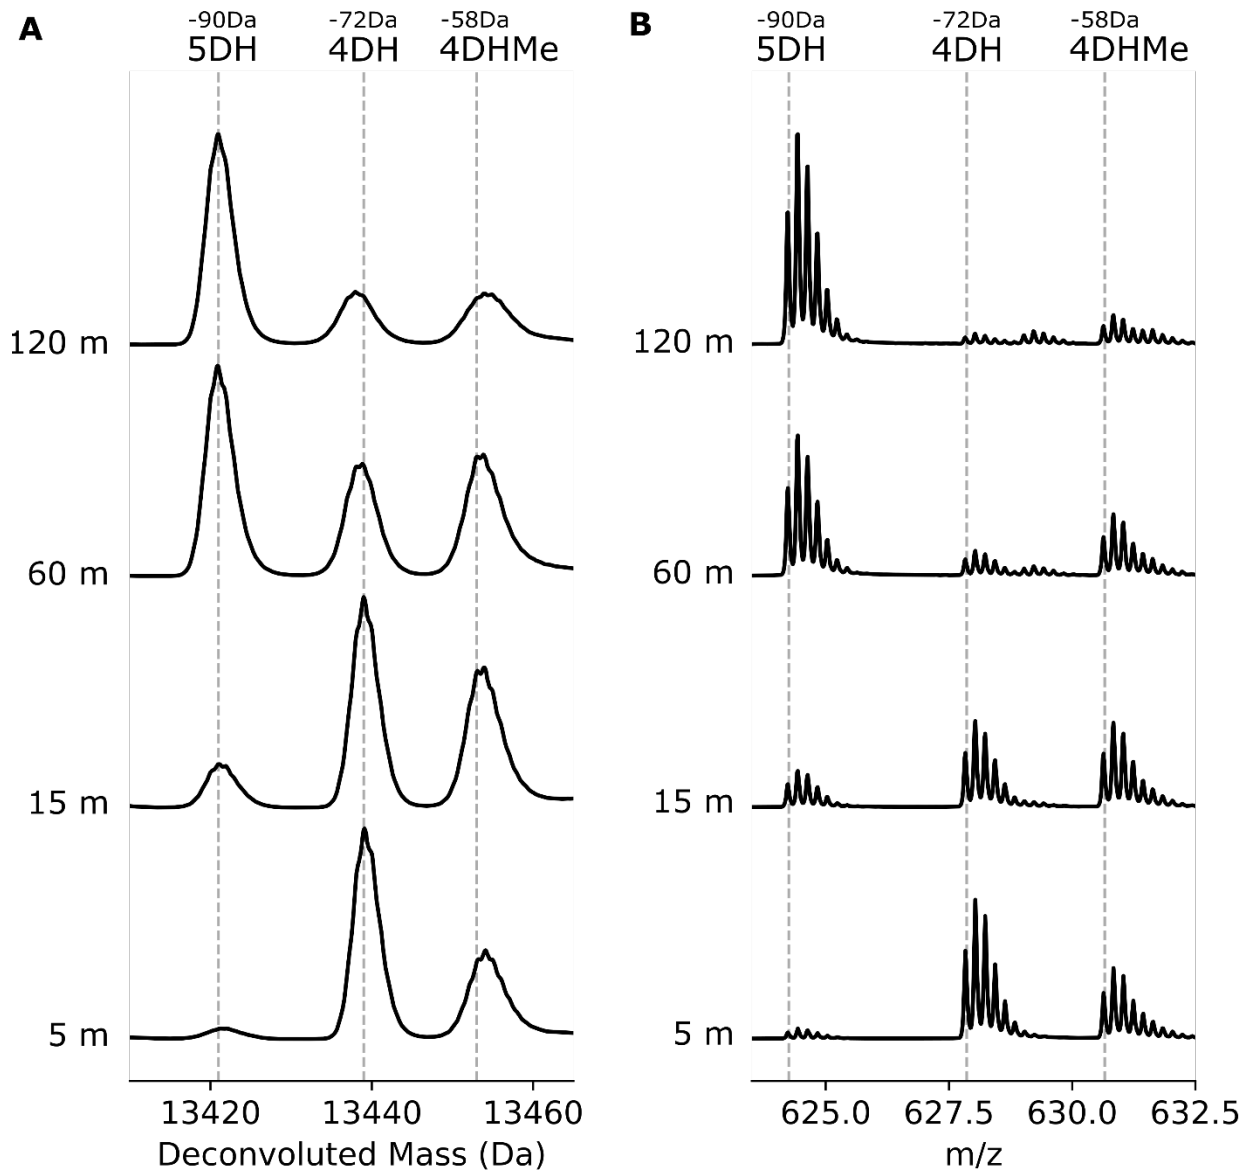

**Figure S10:** Comparison of the *in vitro* aspartimidylation of **(A)** mAmdA<sup>B</sup> and **(B)** pre-amycolimiditide over time. 5DH/4DH indicates species with 5 or 4 dehydrations respectively while 4DHMe is a species with four dehydrations and one Asp methylation. Both reactions progress at a similar rate.

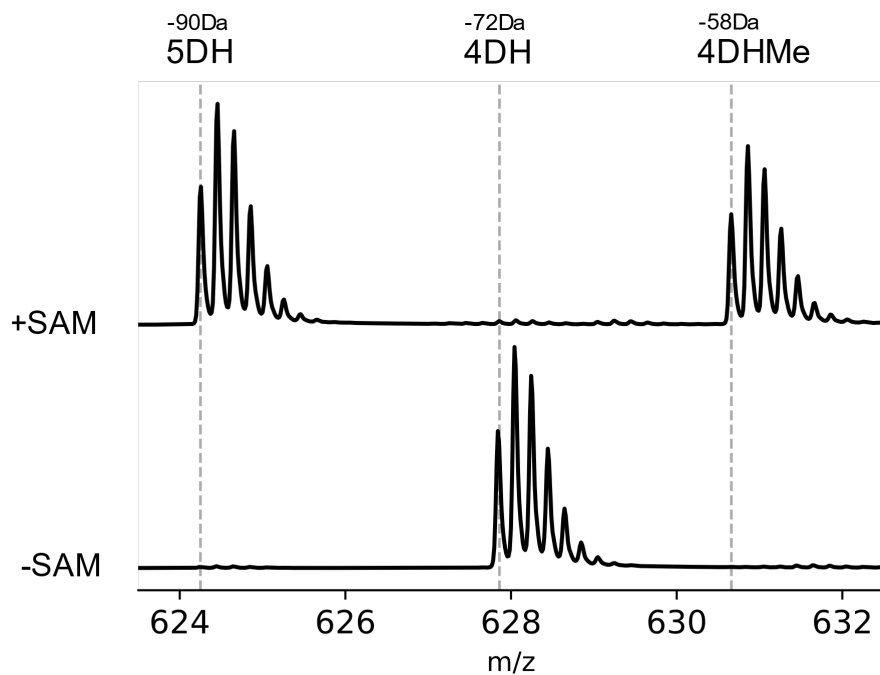

**Figure S11:** Comparison of the *in vitro* aspartimidylation of iso pre-amycolimiditide (top) with and (bottom) without *S*-adenosylmethionine (SAM). 5DH/4DH indicates species with 5 or 4 dehydrations respectively while 4DHMe is a species with four dehydrations and one Asp methylation. The reactions were done at 28 °C for 1 hour. Without SAM, the reaction does not proceed.

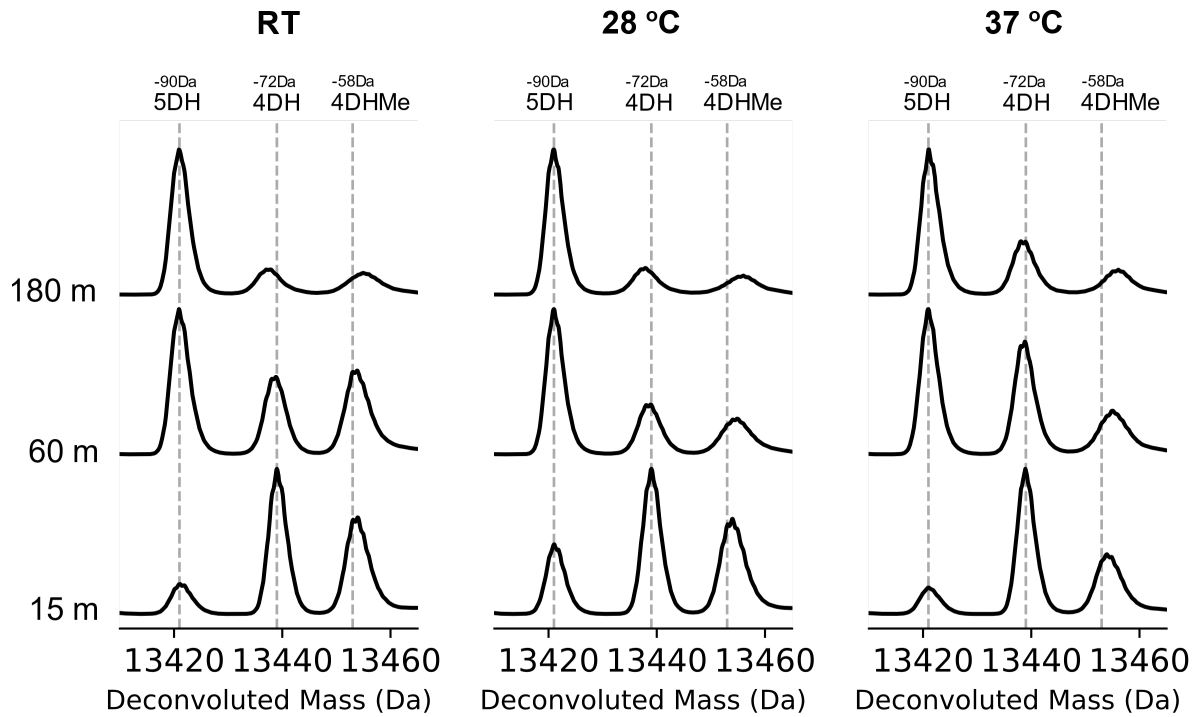

**Figure S12:** Comparison of the *in vitro* aspartimidylation of mAmDA<sup>B</sup> at (left) room temperature, (middle) 28 °C, and (right) 37 °C. 5DH/4DH indicates species with 5 or 4 dehydrations respectively while 4DHMe is a species with four dehydrations and one Asp methylation. Reactions at all three temperatures proceed at a similar rate.

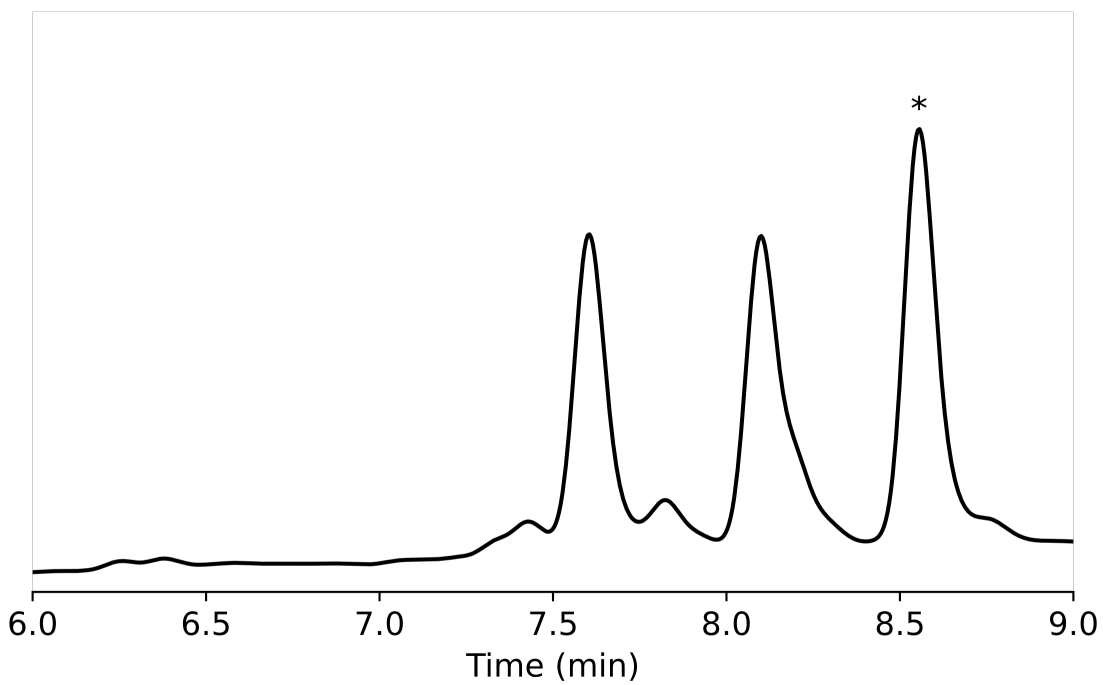

**Figure S13:** HPLC purification (absorbance at 215 nm) of methylated pre-amycolimiditide. The asterisk (\*) indicates the peak that was purified.

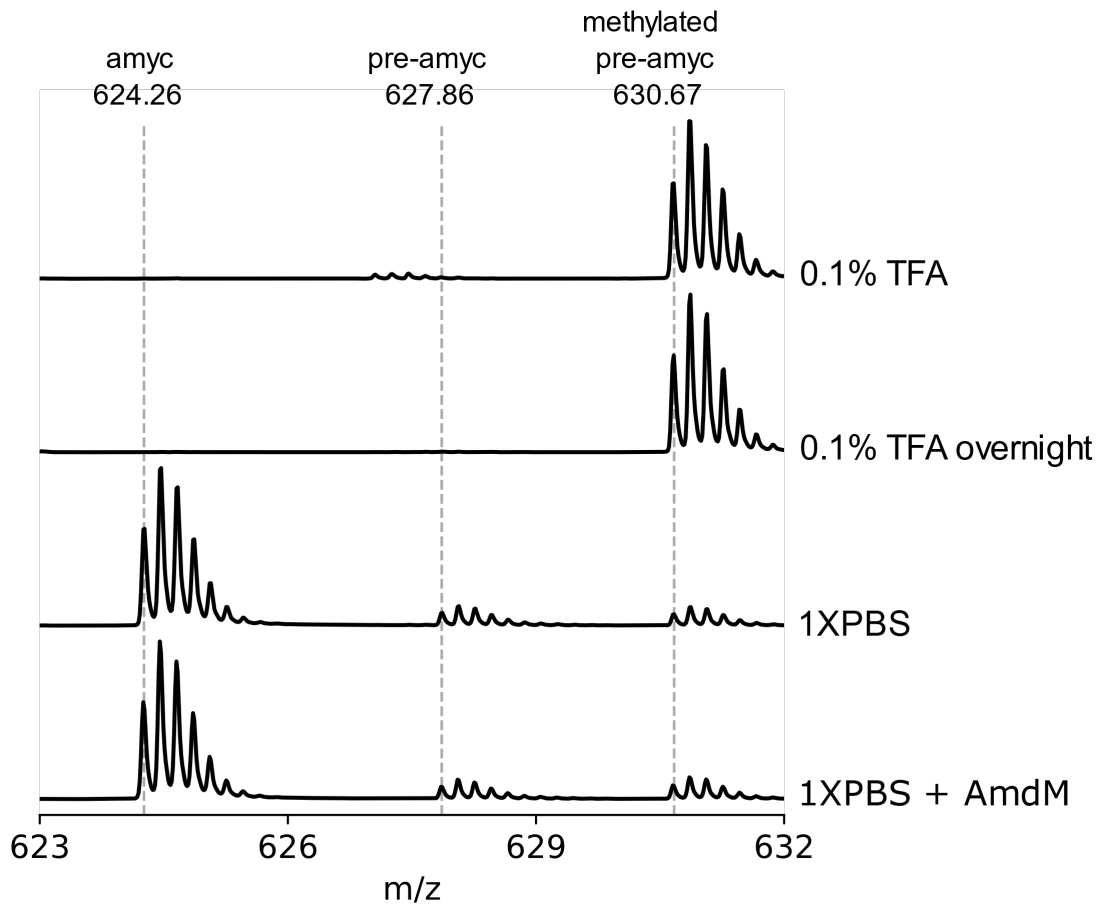

**Figure S14:** MS scan for monitoring the backbone cyclization after the HPLC-purification of methylated pre-amycolimiditide. 0.1% TFA: MS acquired immediately after the HPLC collection of the methylated pre-amycolimiditide. 0.1% TFA overnight: Methylated pre-amycolimiditide incubated in 0.1% TFA overnight. The backbone cyclization does not occur at a low pH. 1XPBS: The purified peptide was lyophilized and then resuspended in 1X PBS, pH 7.4 buffer and allowed to react for 30 min. 1XPBS + AmdM: 1  $\mu$ M His<sub>6</sub>-AmdM was added to the peptide and buffer and was allowed to react for 30 min. Conversion of the methyl ester to aspartimide occurs efficiently in the absence of AmdM.



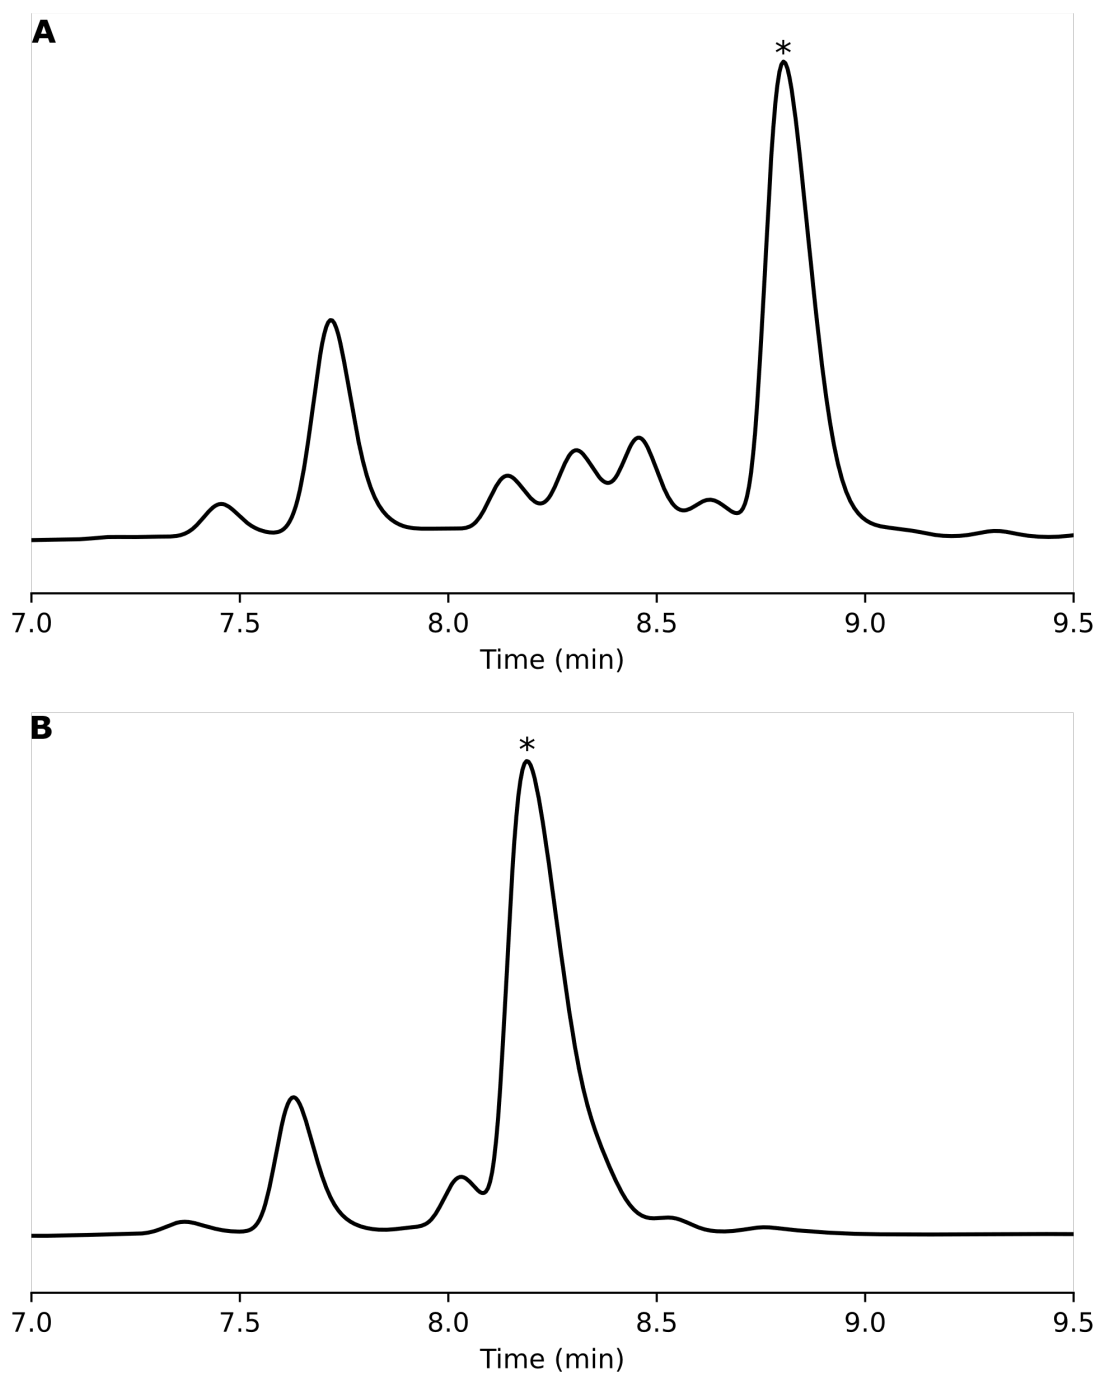

**Figure S15:** HPLC purification (absorbance at 215 nm) of **(A)** amycolimiditide, trypsin-digested from mAmdA<sup>BM</sup>, and **(B)** pre-amycolimiditide, trypsin-digested from mAmdA<sup>B</sup>. The asterisks (\*) indicate the peaks that were purified.

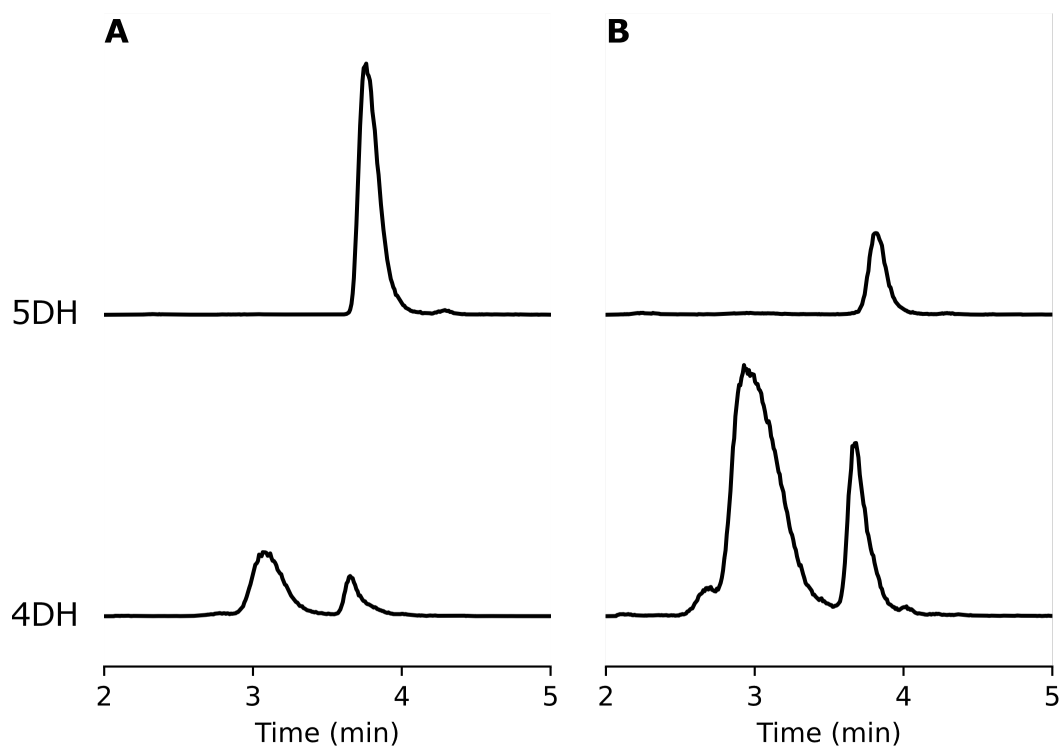

**Figure S16:** Extracted ion current chromatograms (EICs) of aspartimide hydrolysis in amycolimiditide. The top trace represents the EIC for the five-fold dehydrated core peptide (i.e. four esters and one aspartimide), and the bottom trace represents the EIC for the four-fold dehydrated core peptide (only four esters). The y-axes of the traces are normalized to the highest peak height across both EICs. **(A)** Amycolimiditide hydrolyzed at pH 7 for 12 h. **(B)** Amycolimiditide hydrolyzed at pH 8 for 12 h. Hydrolysis happens more rapidly at pH 8, with most of the amycolimiditide hydrolyzed to two isobaric species of pre-amycolimiditide.

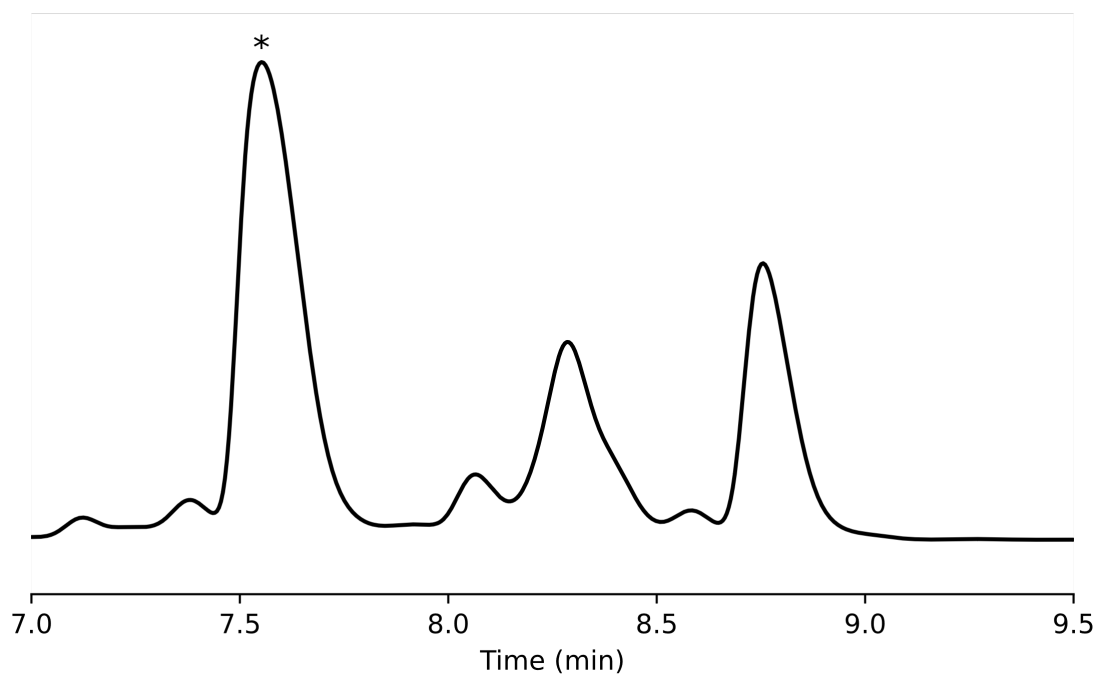

**Figure S17:** HPLC purification (absorbance at 215 nm) of iso pre-amycolimiditide, trypsin-digested from mAmdA<sup>BM</sup> for 2 hours. The asterisk (\*) indicates the peak that was purified.

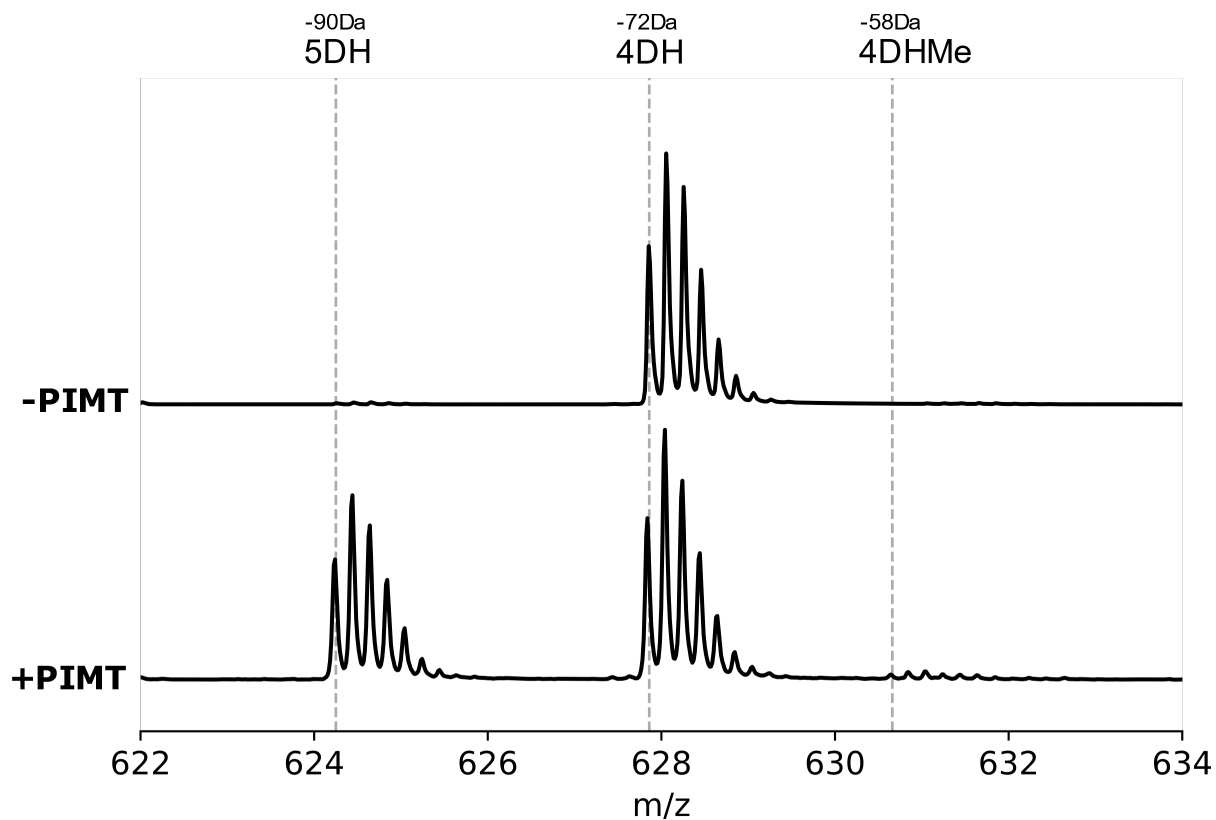

**Figure S18:** MS scan of the major species of amycolimiditide hydrolysate (iso pre-amycolimiditide) modified by the human PIMT. (top) No PIMT control. (bottom) PIMT modification for 3 h. A significant portion of the material is converted to the aspartimide.

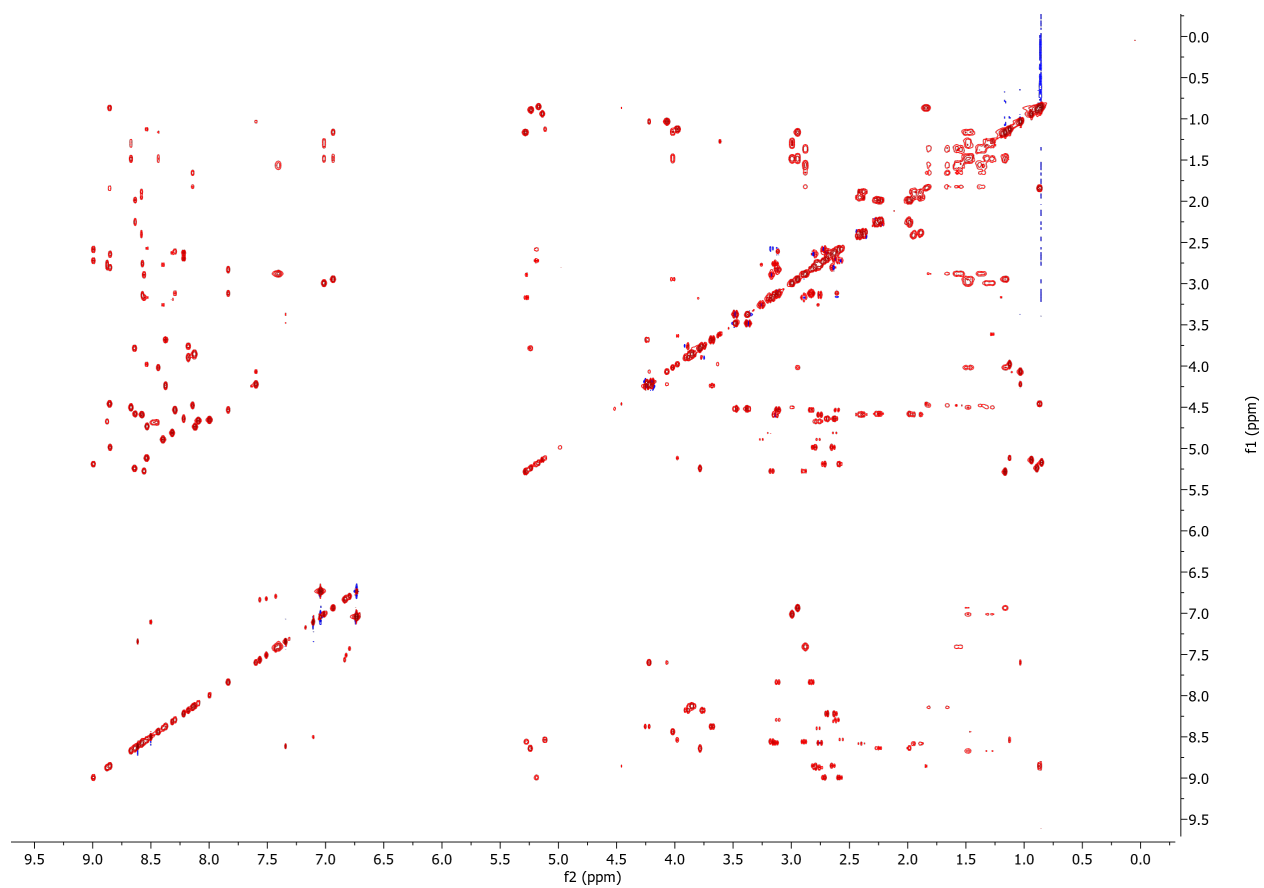

**Figure S19:** TOCSY spectrum of amycolimiditide. The peak assignments are listed in Table S6.

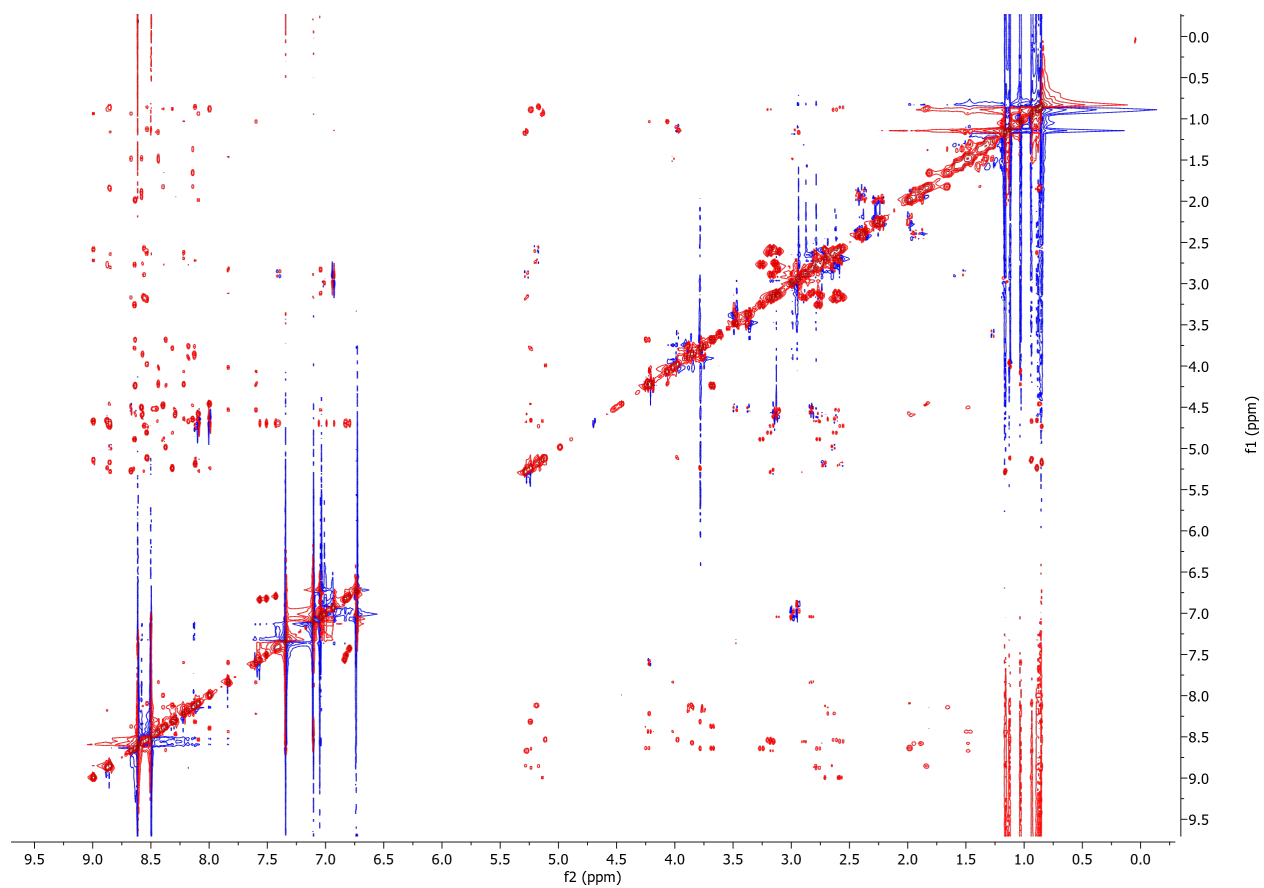

**Figure S20:** NOESY spectrum of amycolimidite with a mixing time of 150 ms. This spectrum was integrated to determine distance constraints.

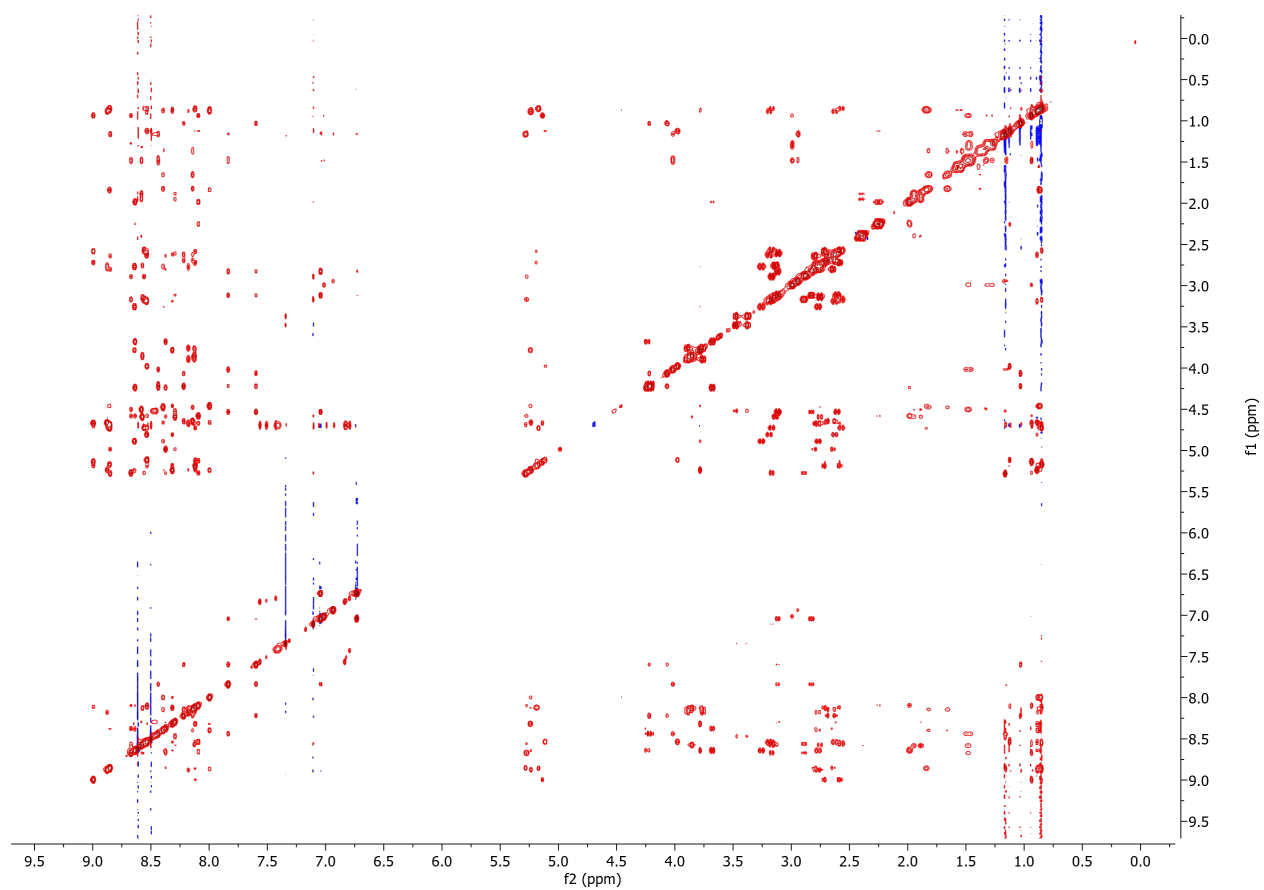

**Figure S21:** NOESY spectrum of amycolimidite with a mixing time of 700 ms. The peak assignments are listed in Table S6.

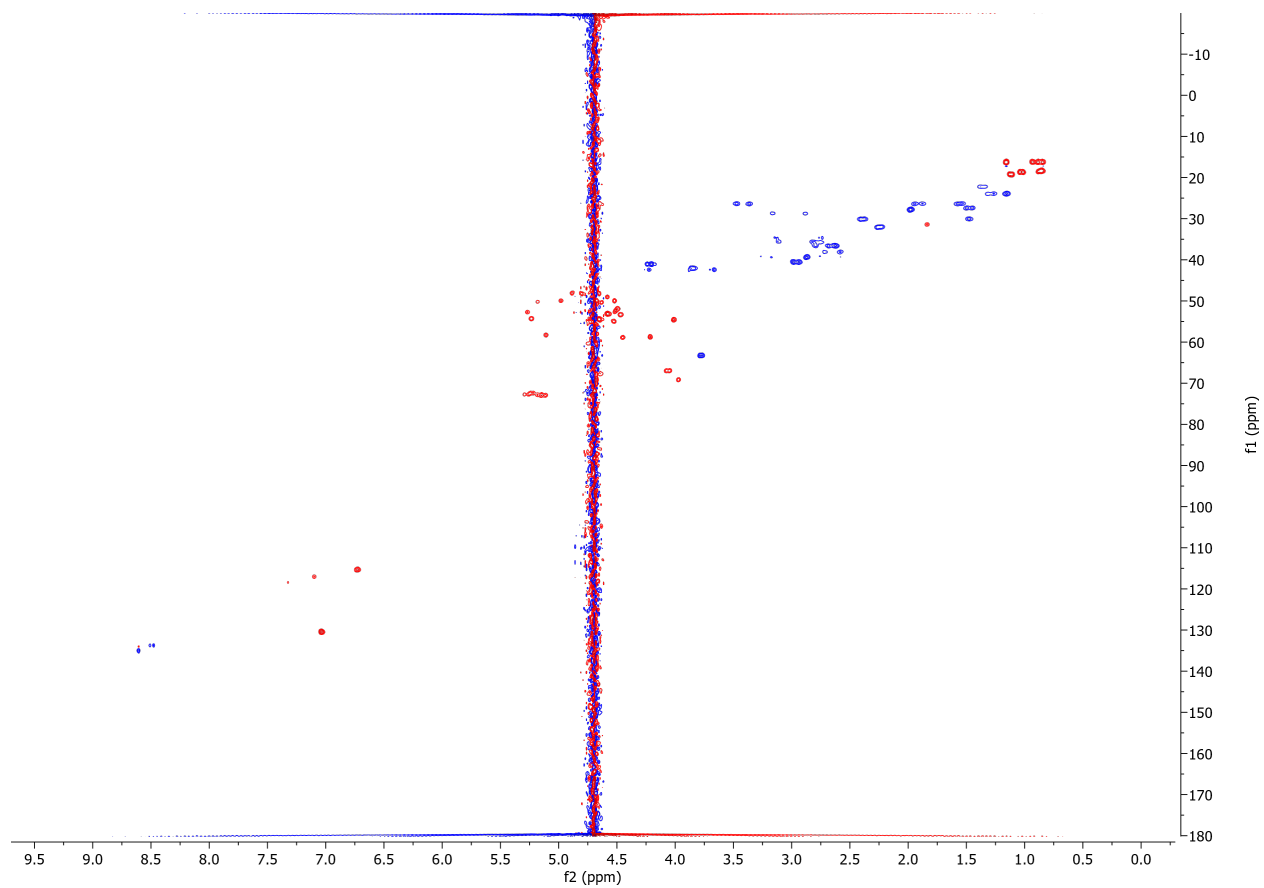

**Figure S22:**  $^1\text{H}$ - $^{13}\text{C}$  HSQC spectrum of amycolimiditide. The peak assignments are listed in Table S6.



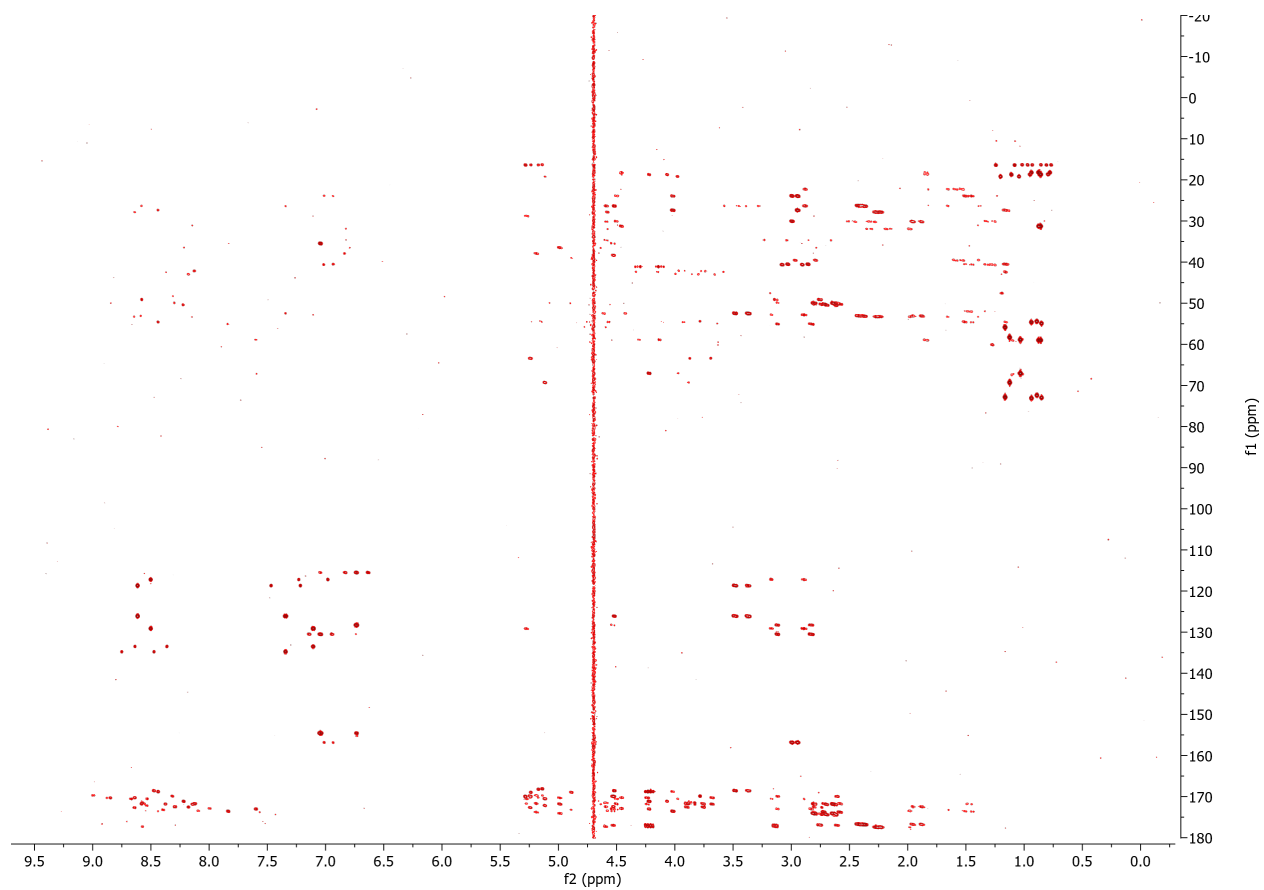

**Figure S23:**  $^1\text{H}$ - $^{13}\text{C}$  HMBC spectrum of amycolimidite, optimized for 10 Hz couplings. The peak assignments are listed in Table S6.

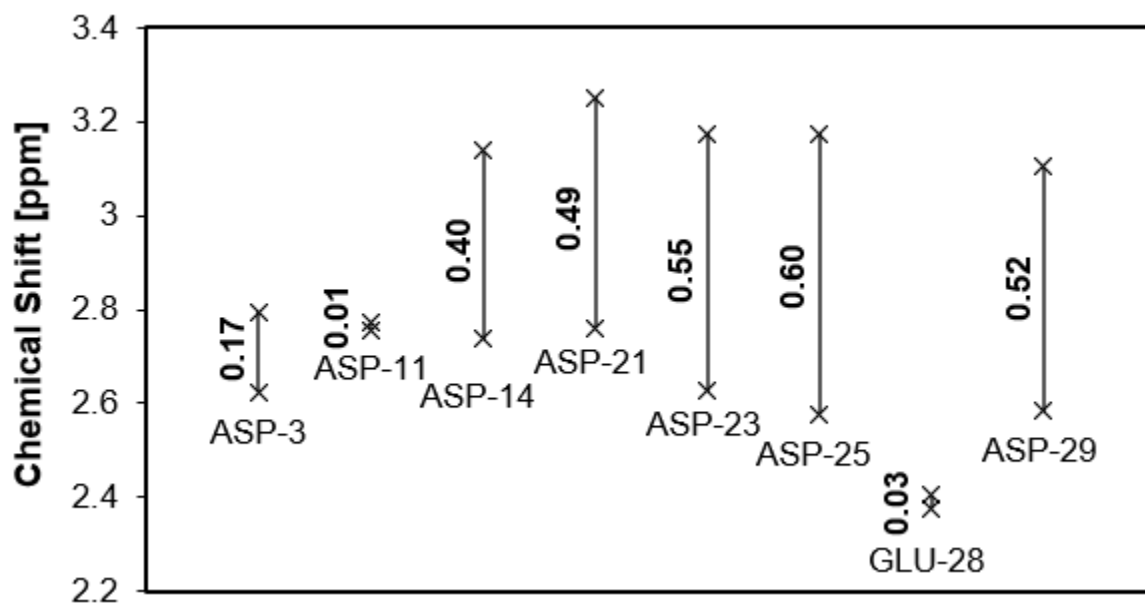

**Figure S24:** The chemical shifts of the  $\beta$ -protons of Asp and the  $\gamma$ -protons of Glu from amycolimiditide. The numbers adjacent to the vertical line segments indicate the difference between the chemical shifts of the two protons. The differences between the chemical shifts of the two  $\beta$ -protons of Asp-14, Asp-21, Asp-23, Asp-25, and Asp-29 are significantly larger than the others.

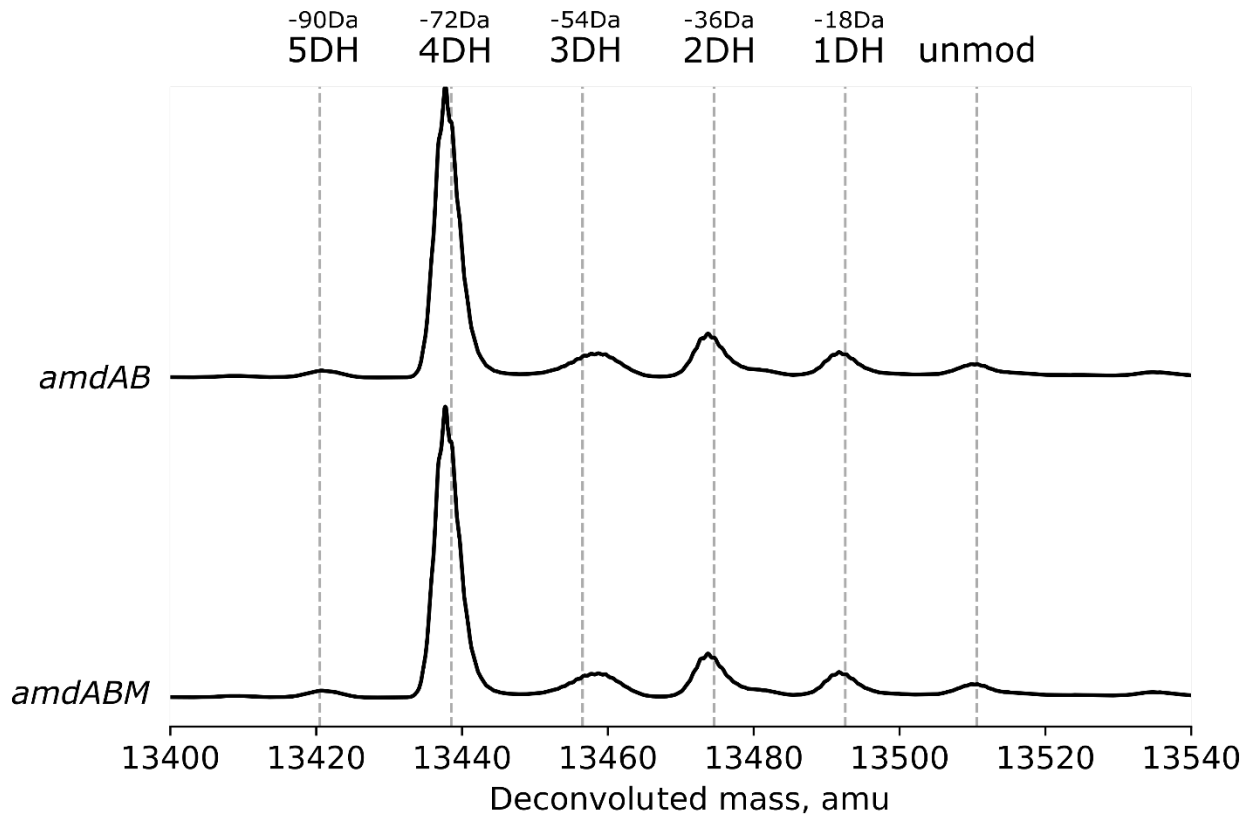

**Figure S25:** Co-expression of the AmdA(D14N) variant with **(A)** SUMO-AmdB and **(B)** SUMO-AmdB and AmdM. Both co-expression experiments yield four dehydrations, indicating that AmdM does not aspartimidylate the AmdA(D14N) variant.

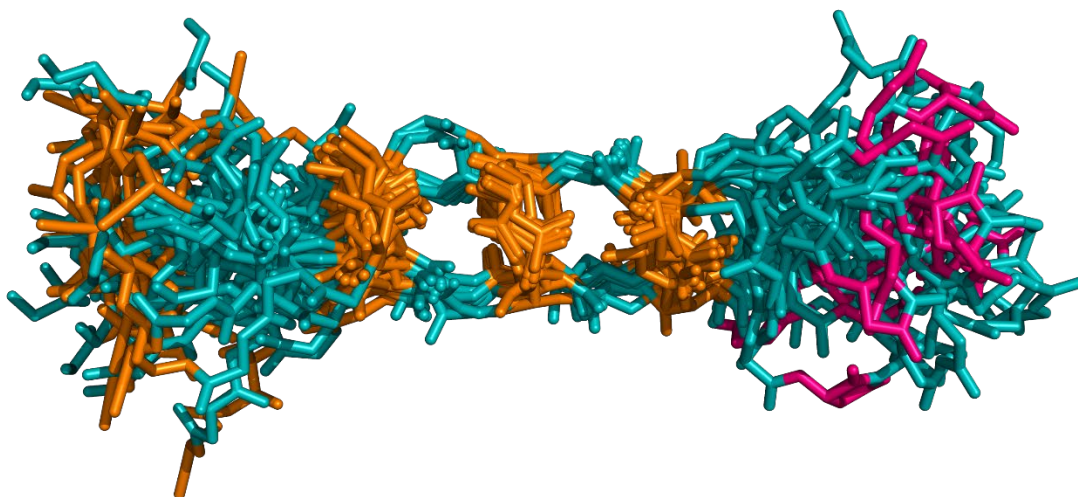

**Figure S26:** Alignment of the top 20 amycolimiditide NMR structures (PDB: 8DYM). Only the backbone atoms of all residues and the sidechain atoms of the  $\omega$ -ester linkages and the aspartimide are shown. All atoms of the  $\omega$ -ester linkages are colored orange, the aspartimide magenta, and the rest teal. The structures are aligned at the intermediate stem region, across the T10-D21, T8-D23, and T6-D25 crosslinks. The average stem length (measured as the distance between the ester carbonyl carbon of T2-D29 crosslink and the ester carbonyl carbon of T10-D21 crosslink) is  $24 \pm 1$  Å. The average peptide length (measured as the distance between the ester carbon of T2-D29 crosslink and the sidechain carbonyl carbon of Asu-14) is  $35 \pm 2$  Å.

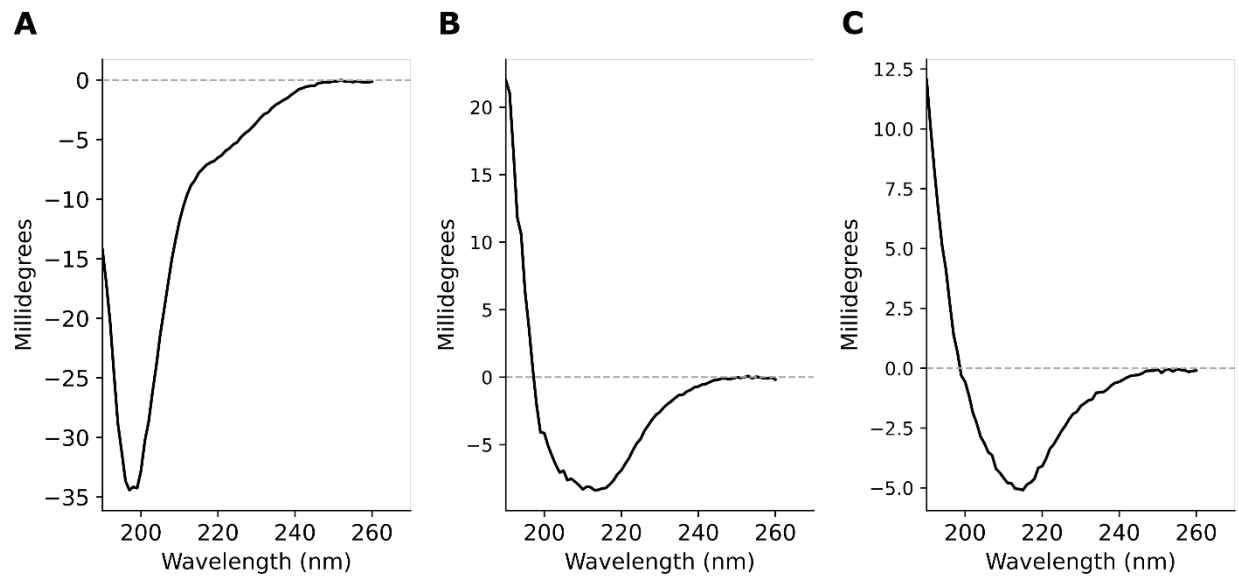

**Figure S27:** Circular dichroism spectroscopy on **(A)** the unmodified core peptide, **(B)** pre-amycolimiditide, and **(C)** amycolimiditide. The data suggest random coil character for the unmodified core peptide and  $\beta$ -strand character for pre-amycolimiditide and amycolimiditide.

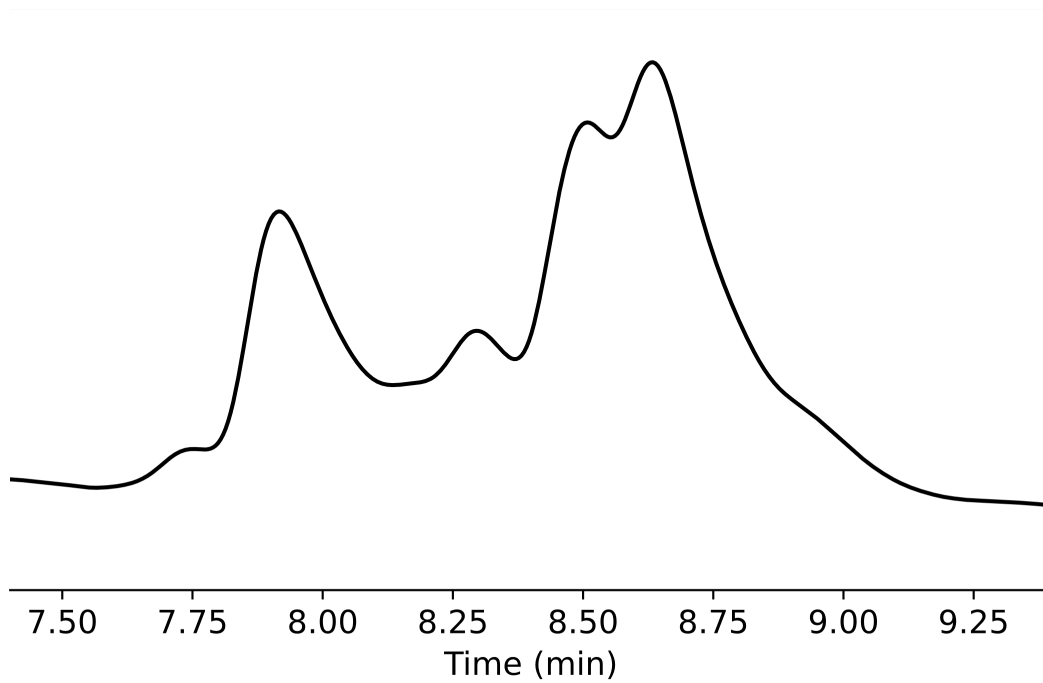

**Figure S28:** HPLC purification (absorbance at 215 nm) of partially-modified core peptides, obtained from the trypsin-digested His<sub>6</sub>-AmdA modified by His<sub>6</sub>-SUMO-AmdB for 2 h. All peaks shown here were collected together and used as a mixture.

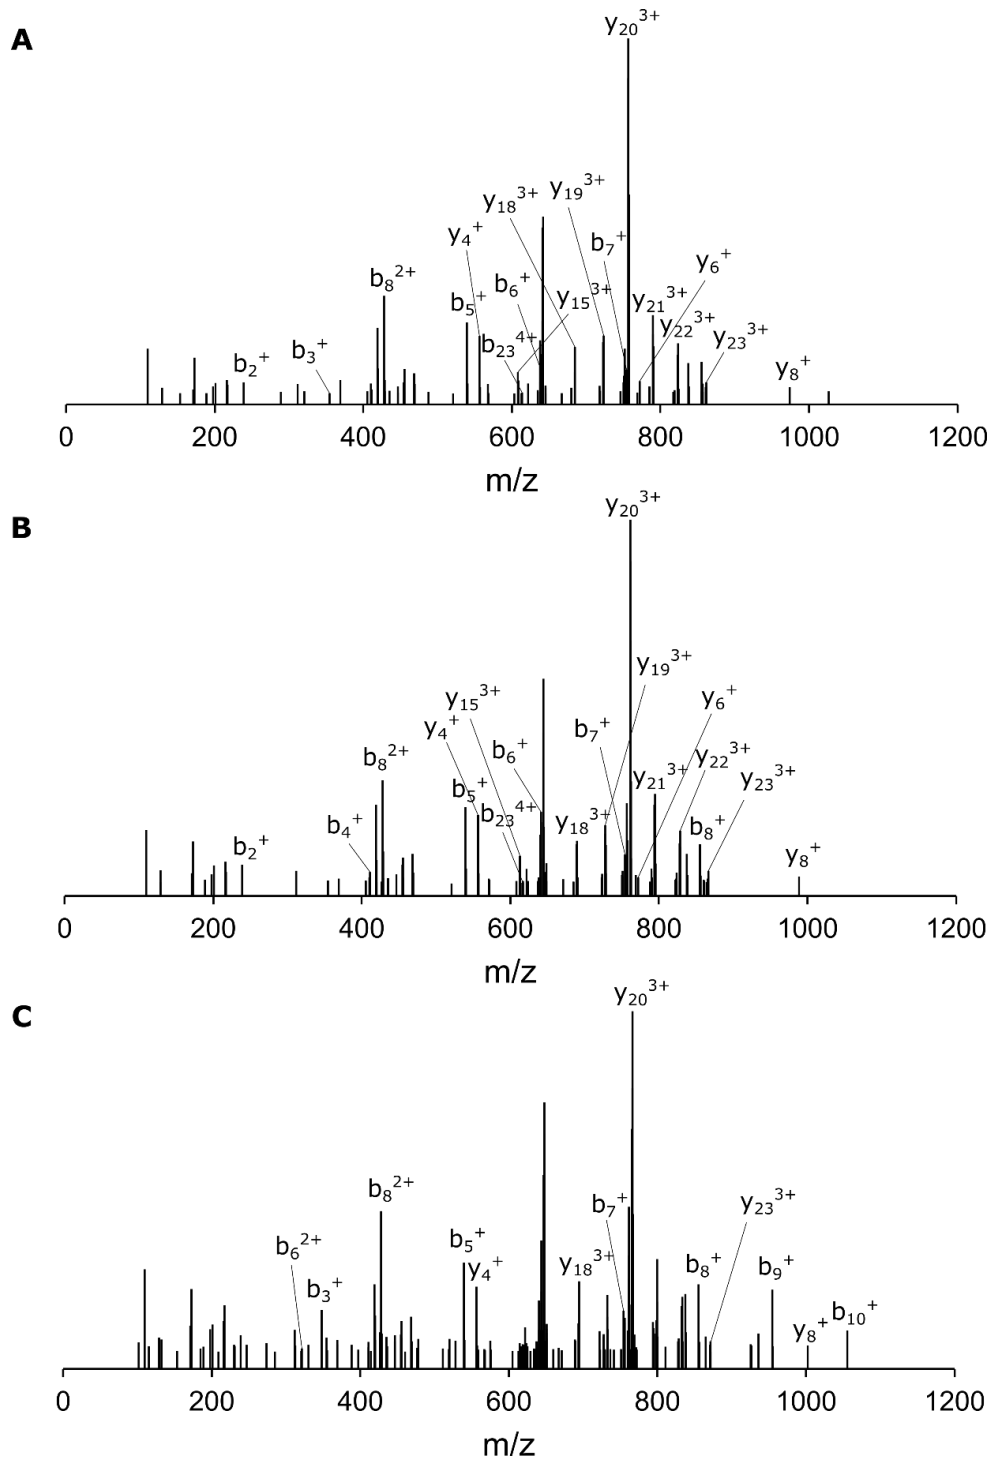

**Figure S29:** MS/MS spectra for pre-amycolimidite intermediate core peptide hydrazinolysed. **(A)** one-fold hydrazinolysed peptide, **(B)** two-fold hydrazinolysed peptide, **(C)** three-fold hydrazinolysed peptide.

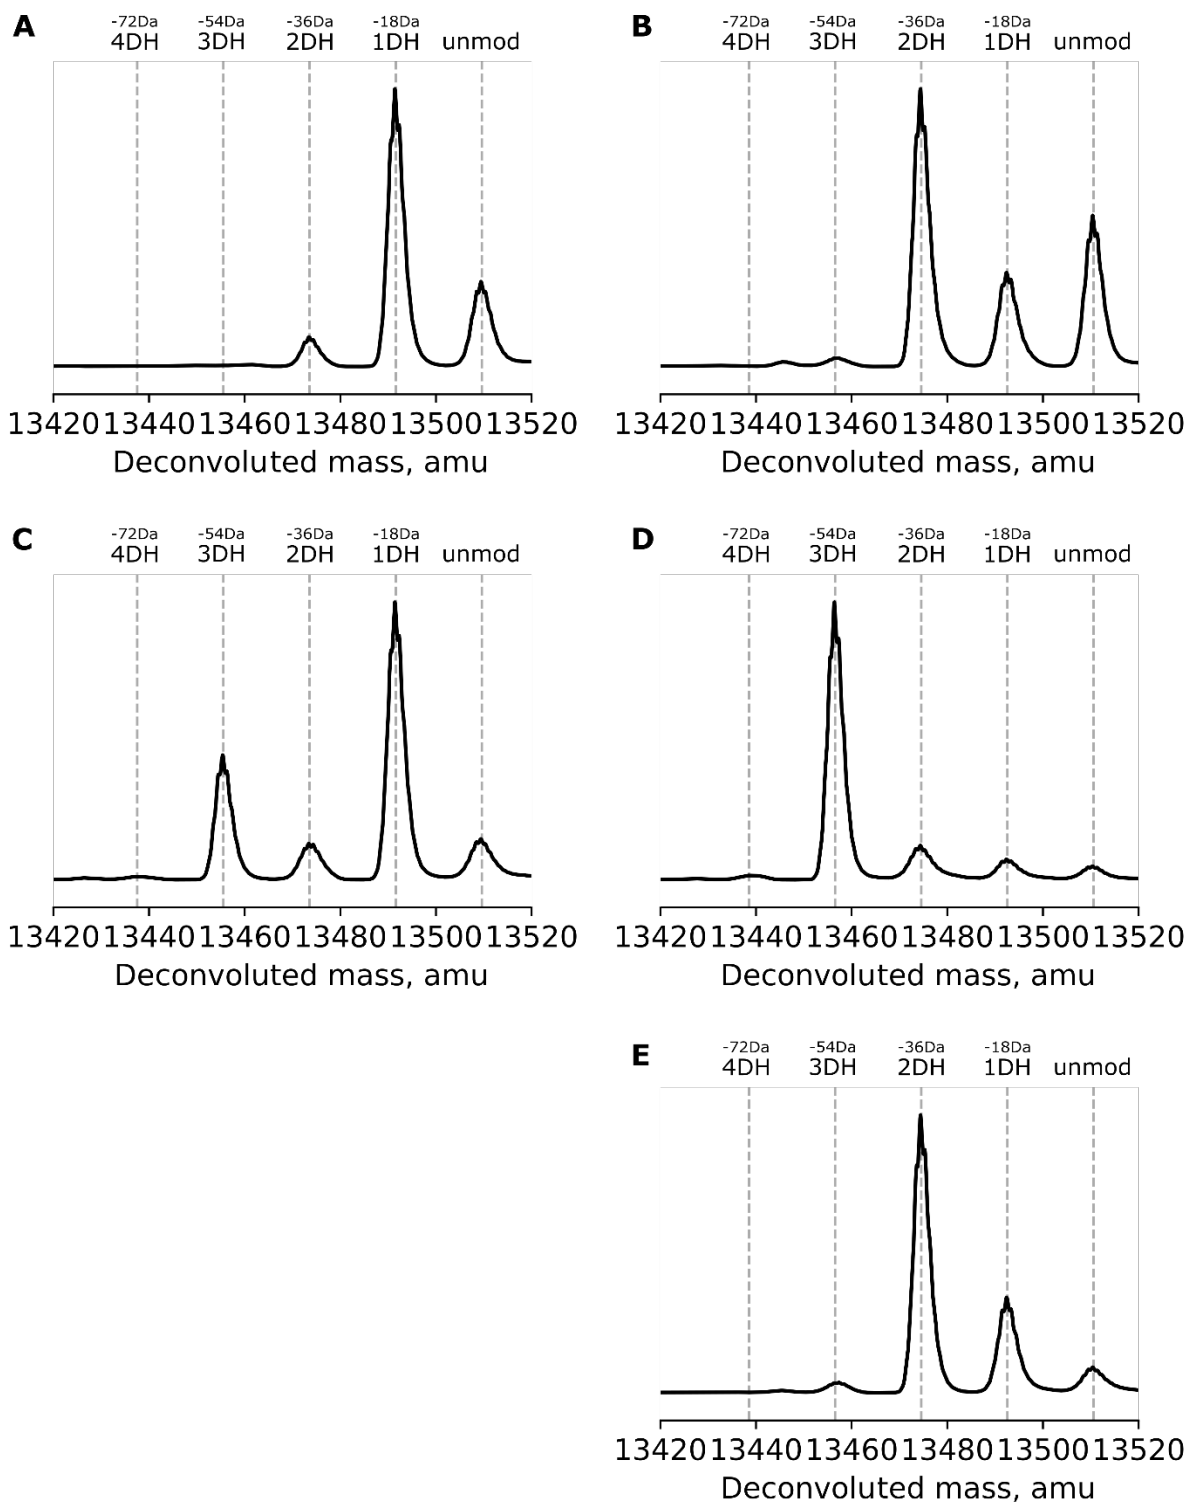

**Figure S30:** Deconvoluted mass spectra of AmdB-modified AmdA variants with single amino acid substitutions. **(A)** T10V and **(B)** D21N, intended to block the formation of I-ester linkage. **(C)** T8V and **(D)** D23N, intended to block the formation of II-ester linkage. **(E)** D25N, intended to block the formation of III-ester linkage.



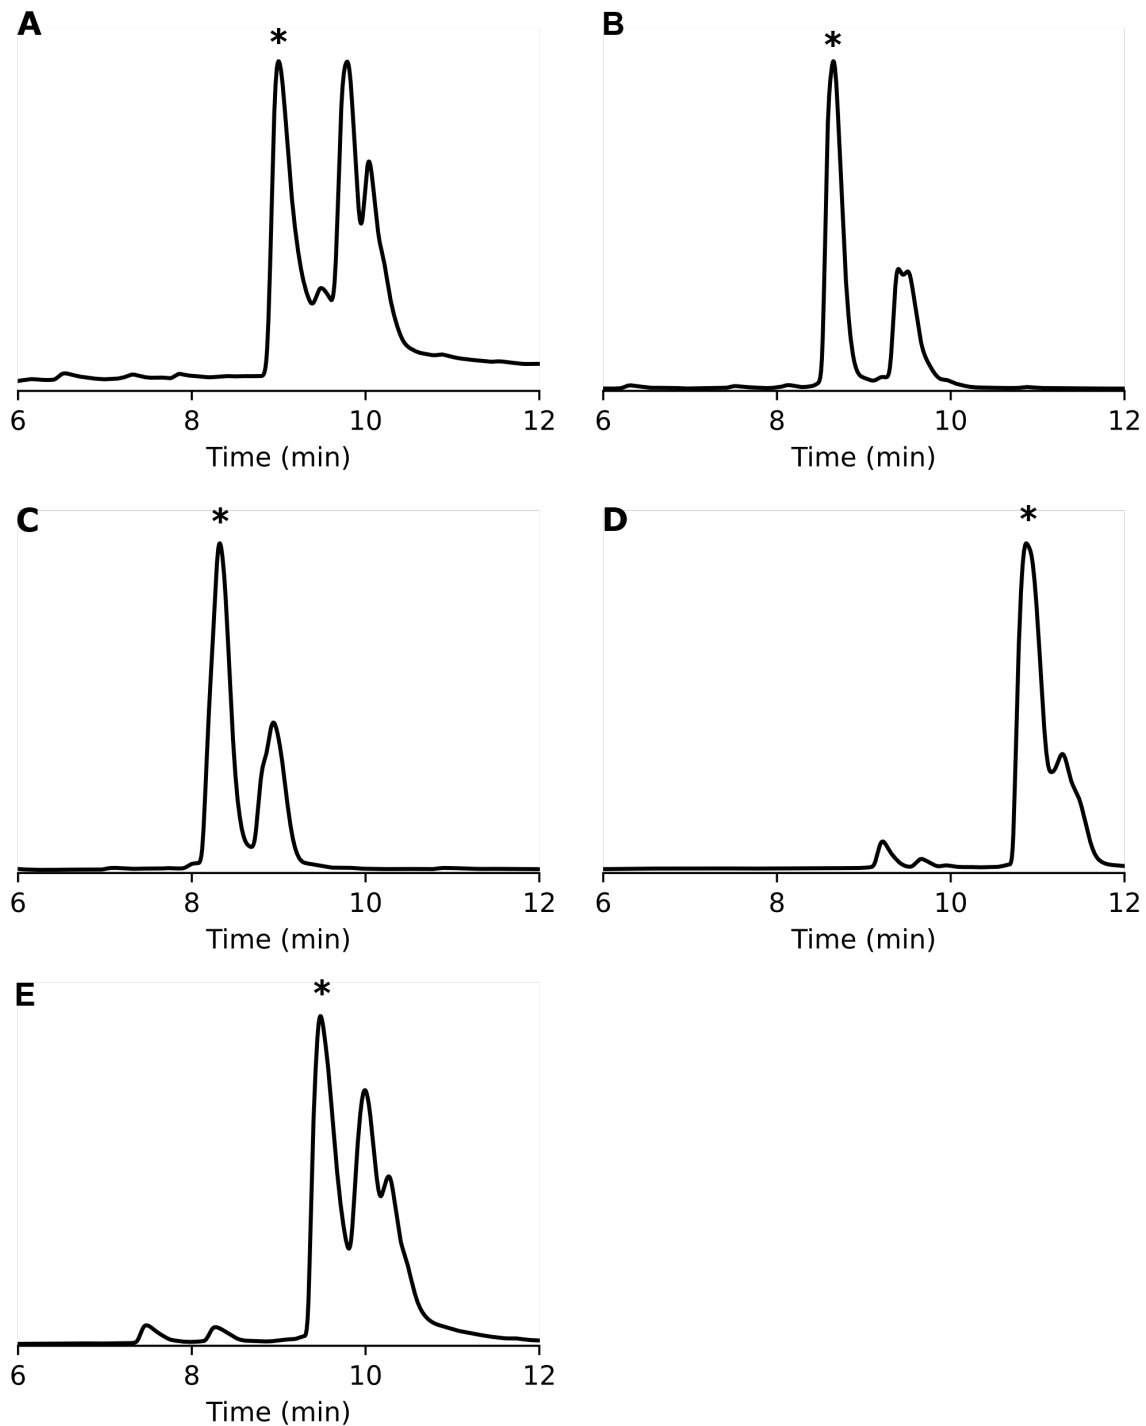

**Figure S31:** HPLC purification (215 nm absorbance) of the core peptides of AmdA variants with double amino acid substitutions modified by SUMO-AmdB. The purified proteins were trypsin digested prior to HPLC purification. **(A)** II-null, **(B)** III-null, **(C)** IV-null, **(D)** II,III-null, and **(E)** II,IV-null variants. The asterisks (\*) indicate the peaks that were purified.

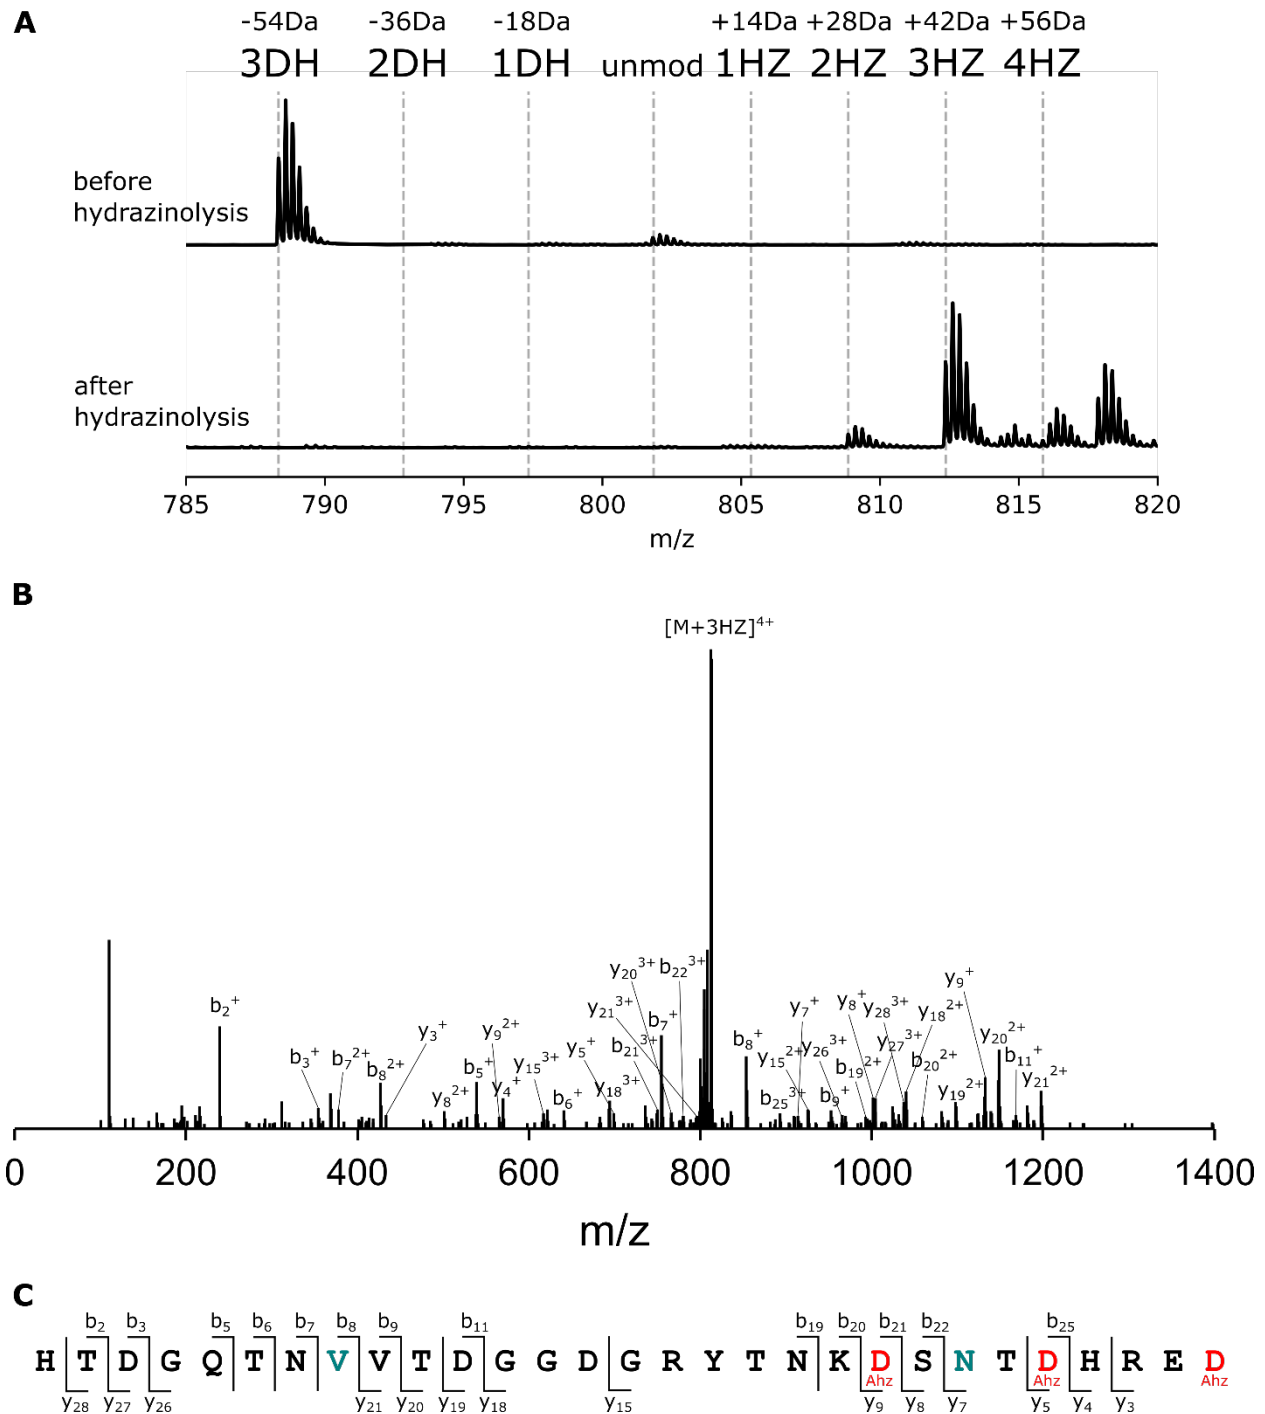

**Figure S32:** Determining the  $\omega$ -ester linkages present in the II-null variant. **(A)** MS scan before (top) and after (bottom) hydrazinolysis. **(B)** MS/MS spectrum on the hydrazinolysed core peptide with the identified *b* and *y* ions (**Table S12**) labelled at the corresponding peaks. The core peptide with 3 hydrazide adducts (3HZ) was selected for fragmentation (CID) at 30V, targeting  $m/z = 813 \pm \sim 1.3$ ,  $z = 4$ . **(C)** Schematics representing the MS/MS fragmentation pattern of the hydrazinolysed core peptide.

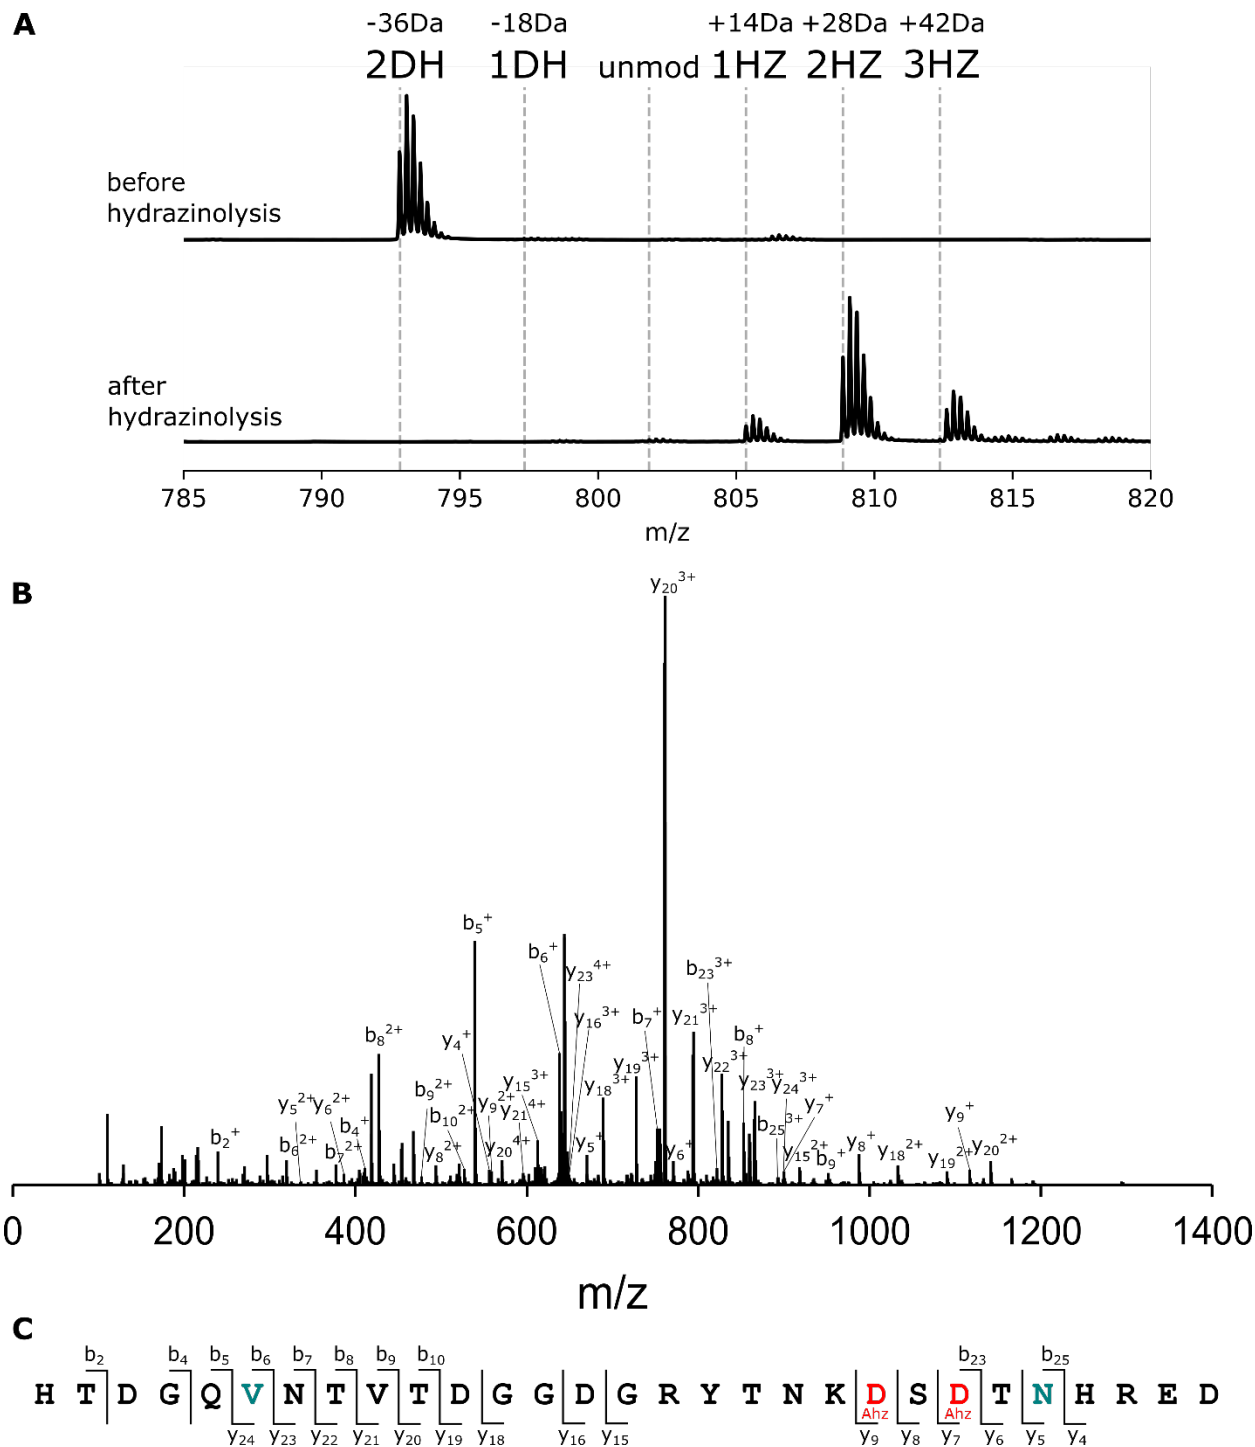

**Figure S33:** Determining the  $\omega$ -ester linkages present in the III-null variant. **(A)** MS scan before (top) and after (bottom) hydrazinolysis. **(B)** MS/MS spectrum on the hydrazinolyzed core peptide with the identified *b* and *y* ions (**Table S13**) labelled at the corresponding peaks. The core peptide with 2 hydrazide adducts (2HZ) was selected for MS/MS fragmentation ( $m/z = 808 \pm \sim 1.3$ ). **(C)** Schematics representing the MS/MS fragmentation pattern of the hydrazinolyzed core peptide.

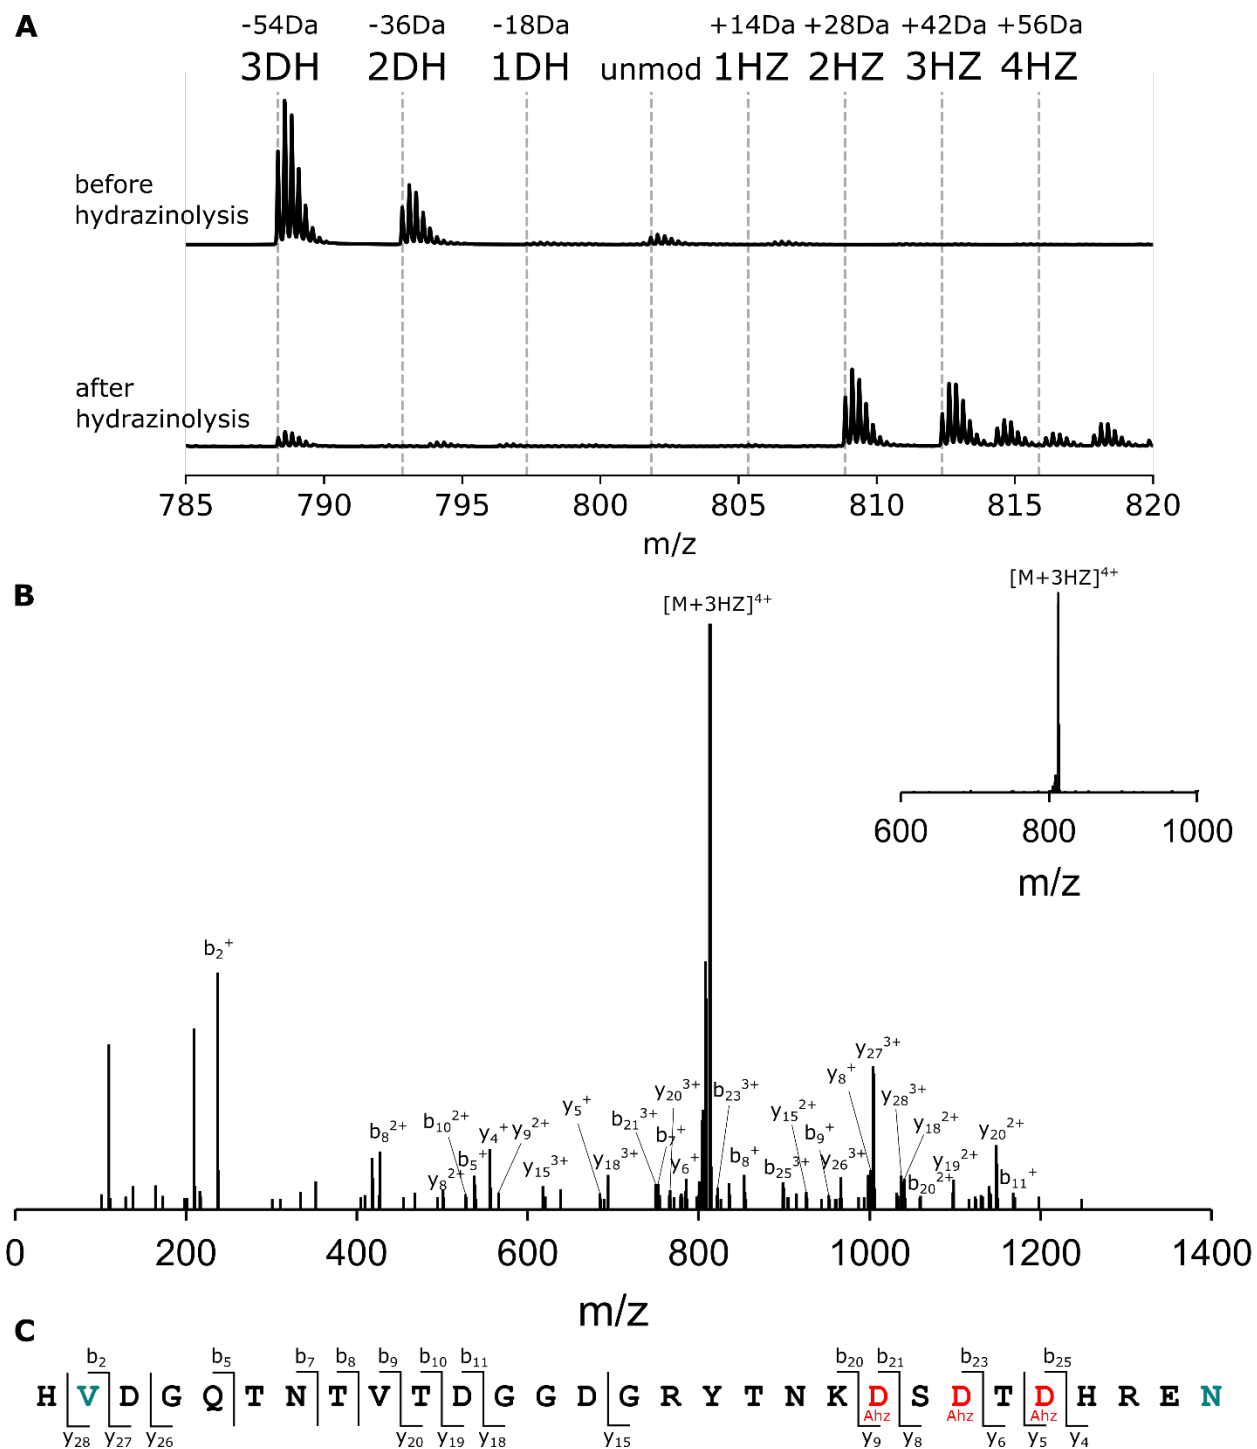

**Figure S34:** Determining the  $\omega$ -ester linkages present in the IV-null variant. **(A)** MS scan before (top) and after (bottom) hydrazinolysis. **(B)** MS/MS spectrum on the hydrazinolysed core peptide with the identified  $b$  and  $y$  ions (**Table S14**) labelled at the corresponding peaks. The core peptide with 3 hydrazide adducts (3HZ) was selected for MS/MS fragmentation ( $m/z = 813 \pm \sim 1.3$ ). **(C)** Schematics representing the MS/MS fragmentation pattern of the hydrazinolysed core peptide.



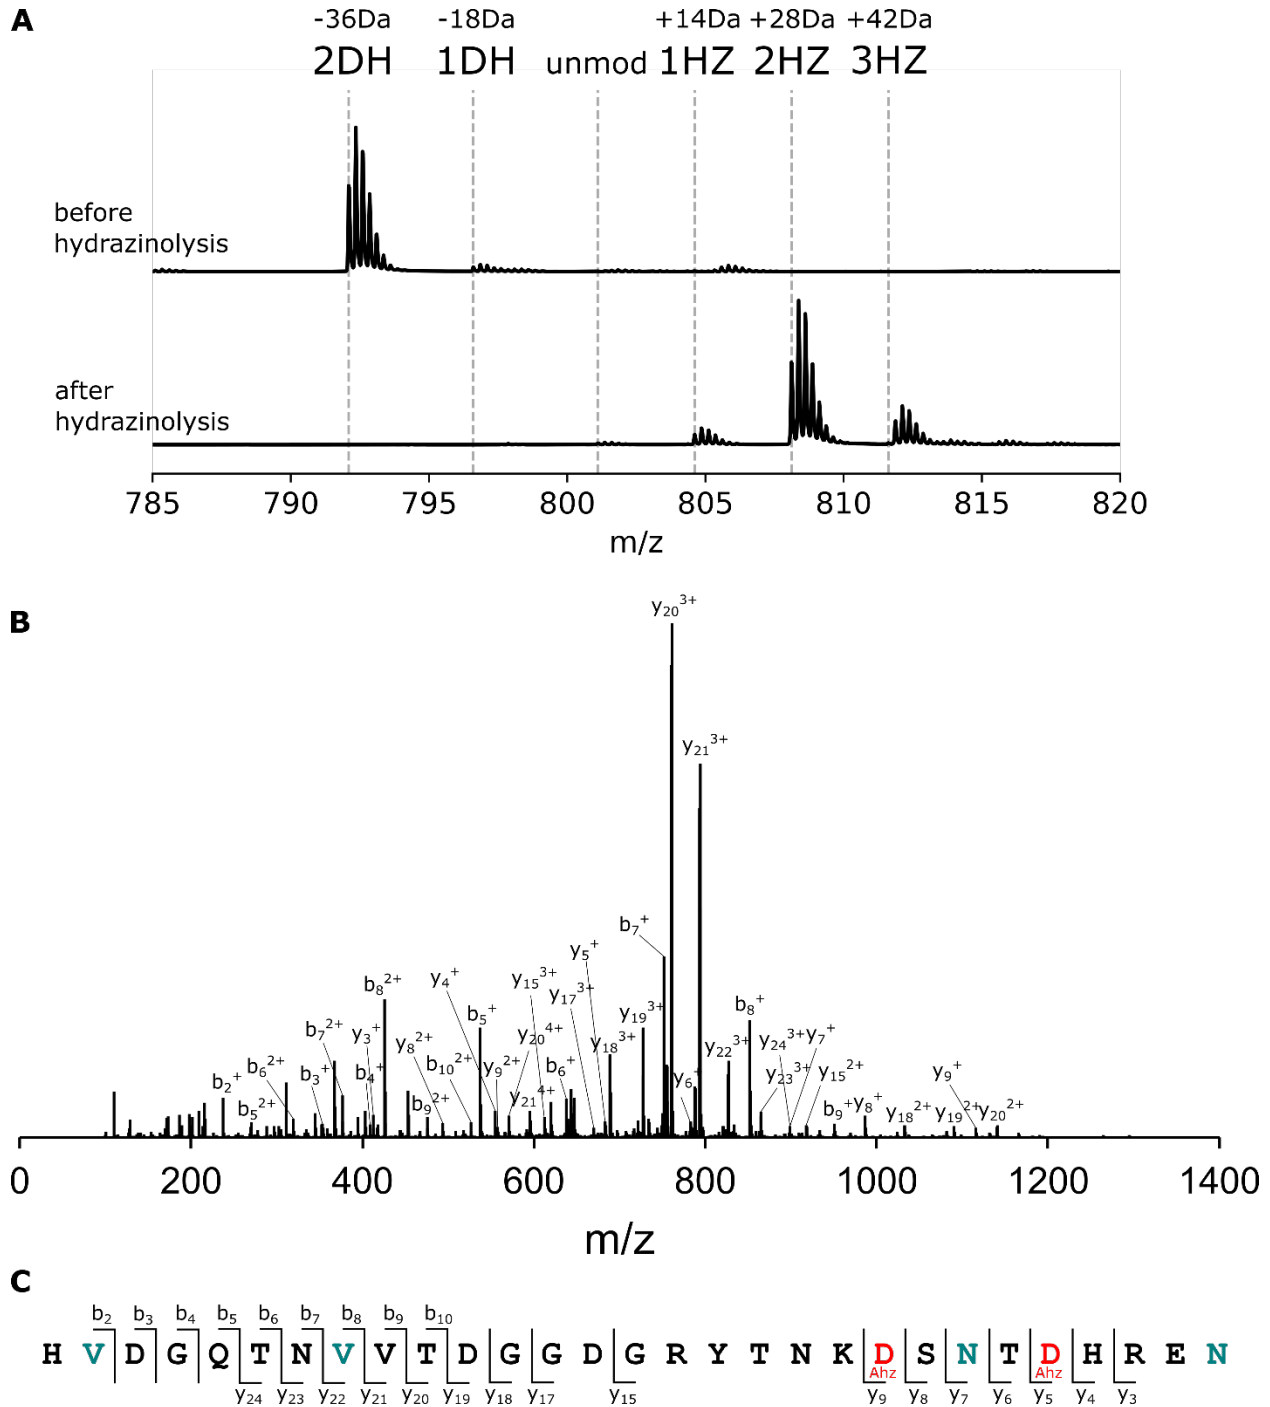

**Figure S36:** Determining the  $\omega$ -ester linkages present in the II,IV-null variant. **(A)** MS scan (top) before and (bottom) after hydrazinolysis. **(B)** MS/MS spectrum on the hydrazinolysed core peptide with the identified *b* and *y* ions (**Table S16**) labelled at the corresponding peaks. The core peptide with 2 hydrazide adducts (2HZ) was selected for MS/MS fragmentation ( $m/z = 808 \pm \sim 1.3$ ). **(C)** Schematics representing the MS/MS fragmentation pattern of the hydrazinolysed core peptide.

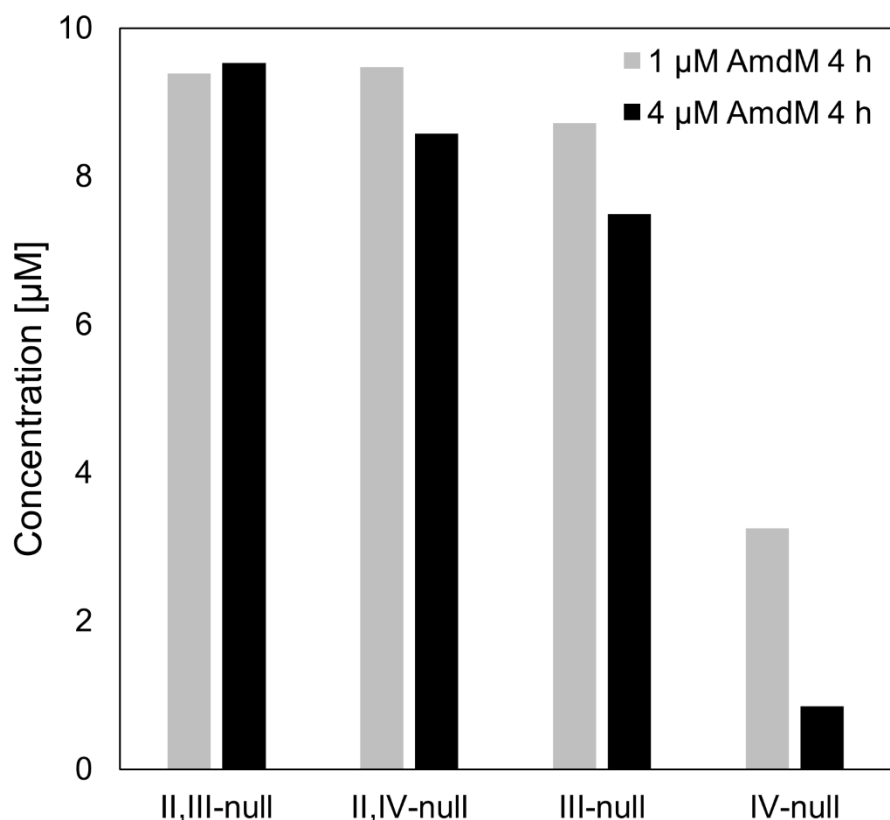

**Figure S37:** Comparison of *in vitro* aspartimidylation of pre-amycolimiditide variants with different concentrations of AmdM (1  $\mu\text{M}$ , grey vs 4  $\mu\text{M}$ , black). The y-axis values represent the concentrations of the pre-aspartimidylated species after 4 h of reaction. The data corresponding to 1  $\mu\text{M}$  AmdM are identical to the data shown in Figure 5B from the main text. Increasing the enzyme concentration 4-fold improves methylation for the variants with two (II,IV-null and III-null variants) or three (IV-null variant) ester linkages, whereas no difference is observed for II,III-null variant, which has only one ester. This trend is consistent with the results of the heterologous expression experiments shown in Figure 5A from the main text.

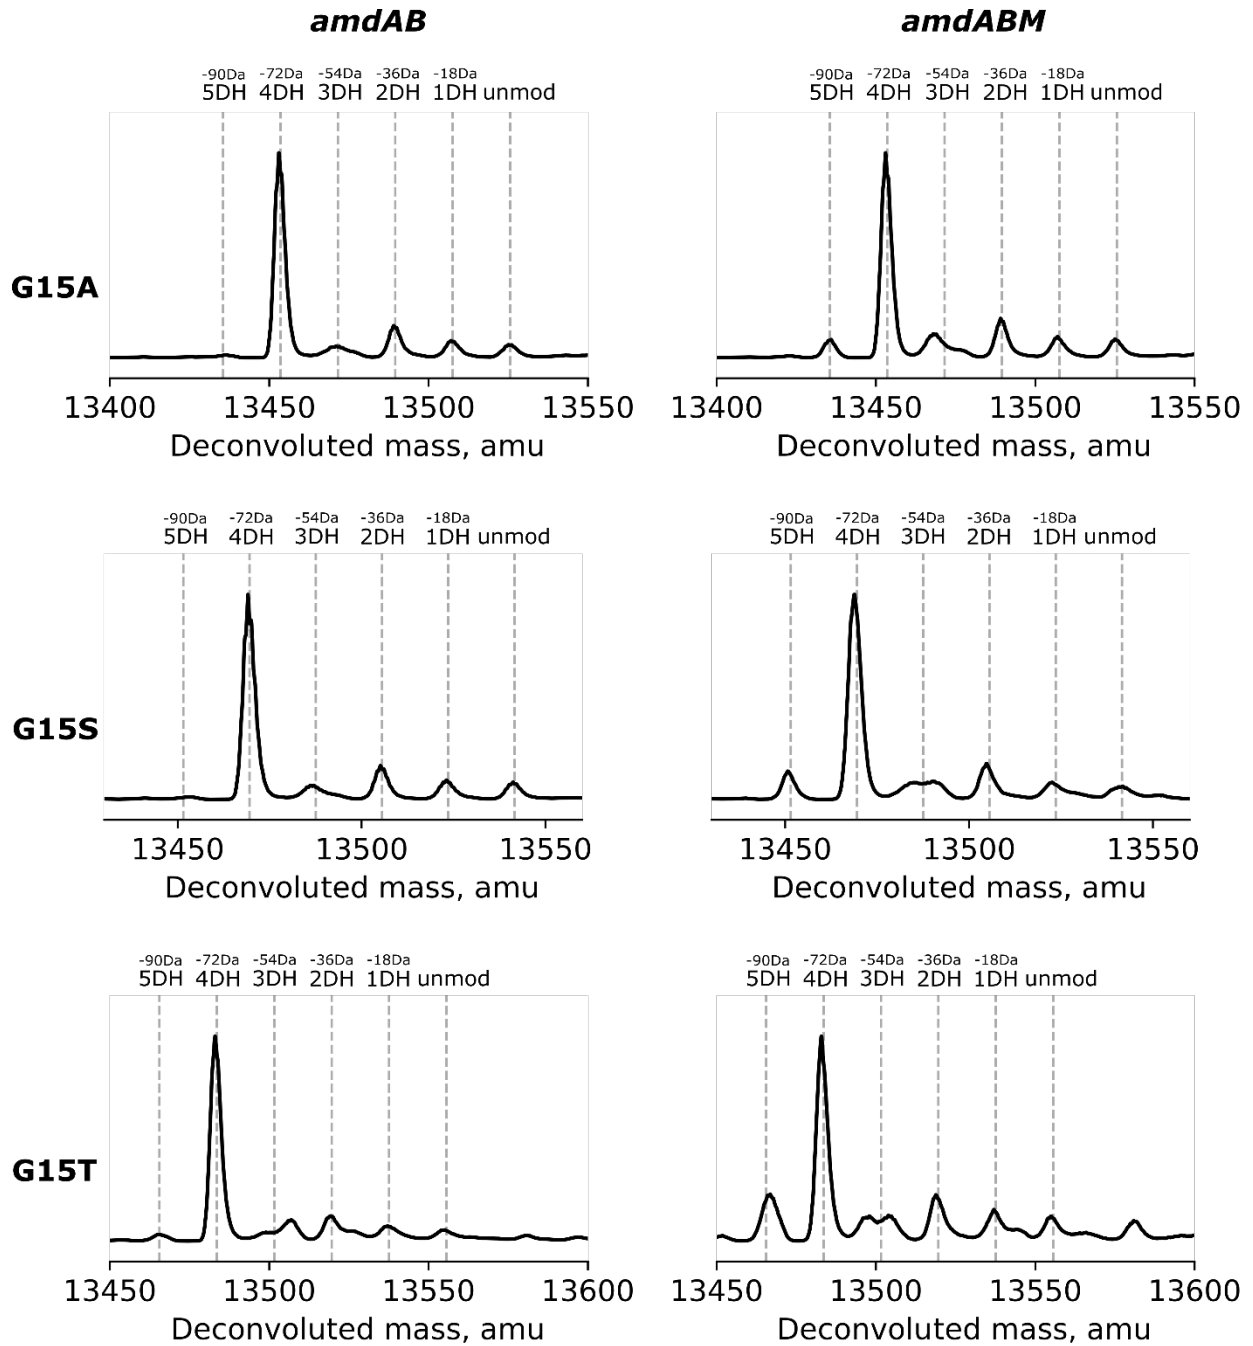

**Figure S38:** SUMO-AmdB and AmdM modified G15 variants. AmdA G15A (top), G15S (middle), G15T (bottom) variants co-expressed with SUMO-AmdB for 20 h (left) or SUMO-AmdB and AmdM for 24 h (right). Only small amounts of the proteins are aspartimidylated, showing that AmdM cannot modify the AmdA G15 variants efficiently.



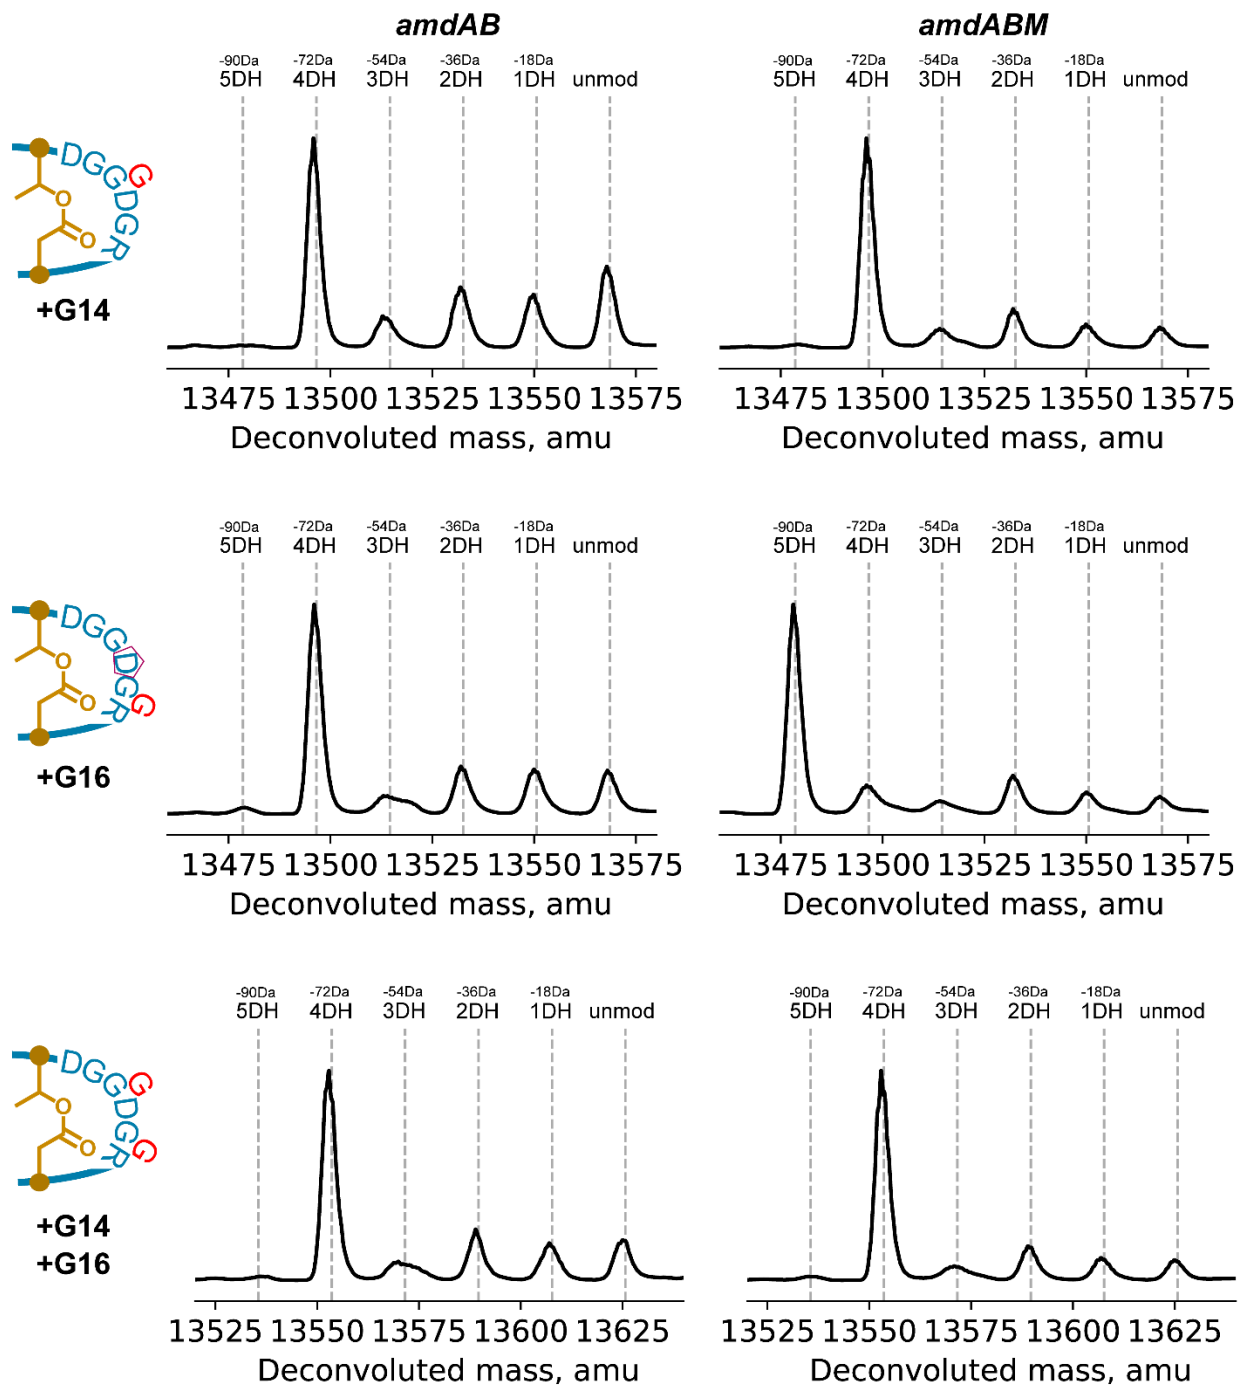

**Figure S39:** SUMO-AmdB and AmdM modified AmdA Gly insertion variants. AmdA +G14 (top, before the aspartimidylation site), +G16 (middle, after the aspartimidylation site), +G14+G16 (bottom) variants co-expressed with SUMO-AmdB for 20 h (left) or SUMO-AmdB and AmdM for 24 h (right). Only the +G16 variant can be aspartimidylated, showing that D14 must be the 14<sup>th</sup> residue to be aspartimidylated by AmdM.

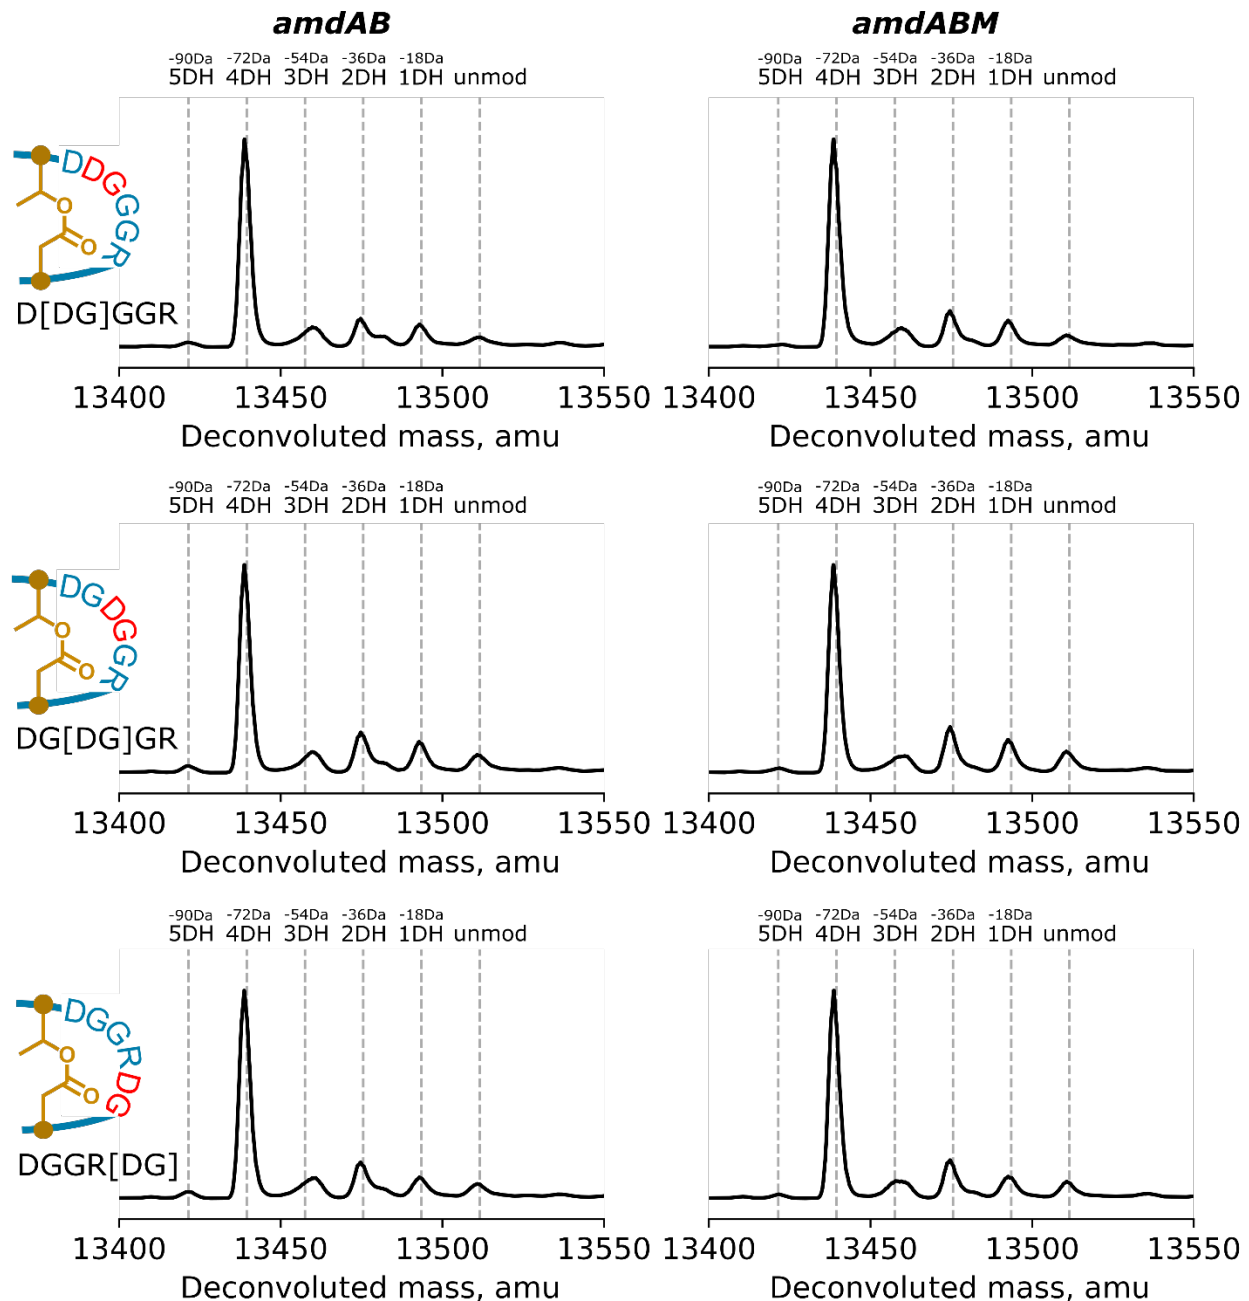

**Figure S40:** SUMO-AmdB and AmdM modified “DG-swap” variants. The first 6 aa in the loop of wild-type amycolimiditide are DGG[DG]R where the brackets indicate the aspartimidylation site. AmdA D[DG]GGR (top), DG[DG]GR (middle), DGGR[DG] (bottom) variants co-expressed with SUMO-AmdB for 20 h (left) or SUMO-AmdB and AmdM for 24 h (right). In these variants, the aspartimidylation site is placed at different locations on the loop. No aspartimidylation occurs for all of these variants, indicating that the location of the native aspartimidylation site is important for recognition by AmdM.

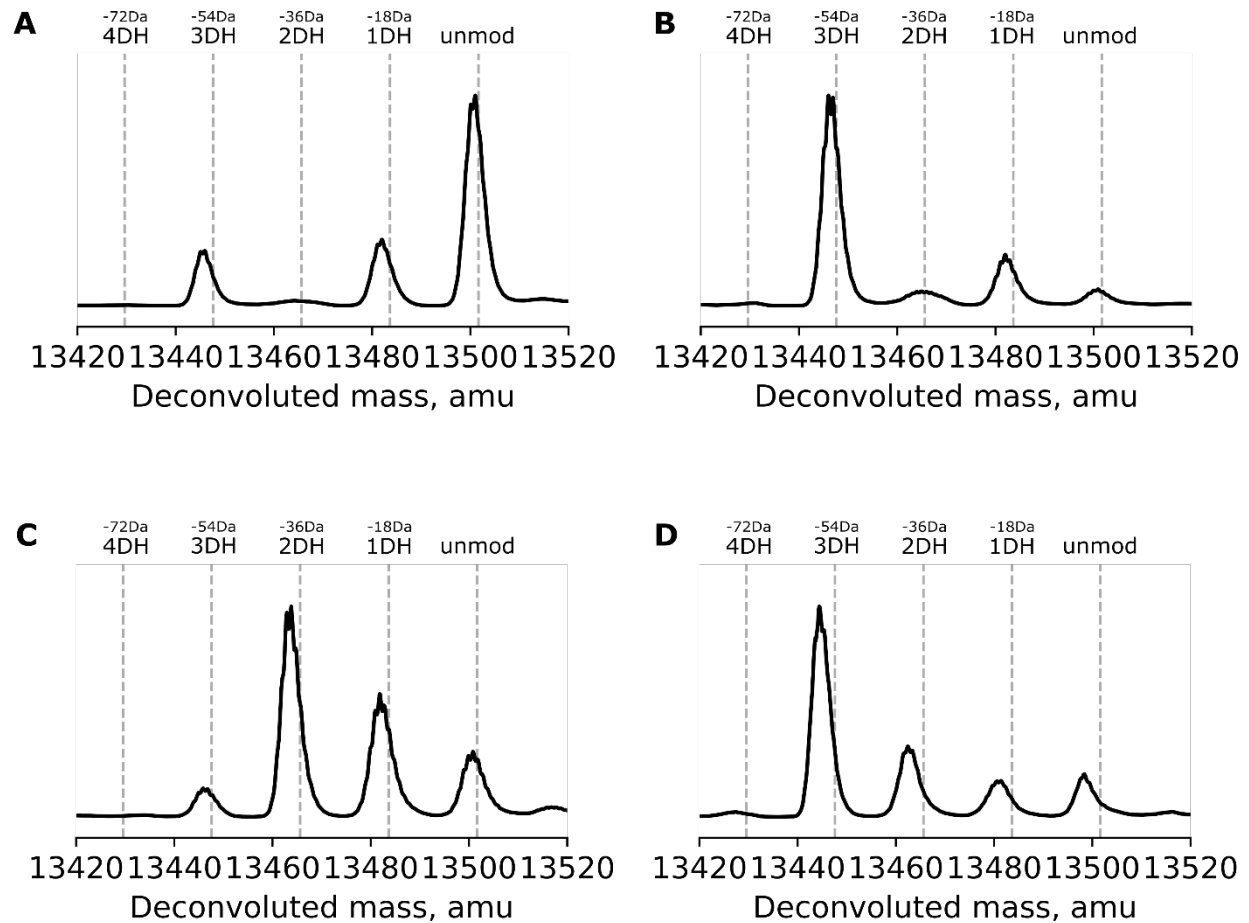

**Figure S41:** SUMO-AmdB modified AmdA disulfide variants. **(A)** I-disulfide, **(B)** II-disulfide, **(C)** III-disulfide, and **(D)** IV-disulfide variants co-expressed with SUMO-AmdB. The vertical dashed lines represent the calculated average masses for  $m\text{AmdA}^{\text{B}}$  with a varying number of dehydrations, without the disulfide bond formation. In *E. coli*, the disulfide variants are modified similarly to the null variants (Fig. 5A in the main text). The disulfide bonds observed in these peptides are presumed to form during protein purification rather than in the reducing *E. coli* cytoplasm.

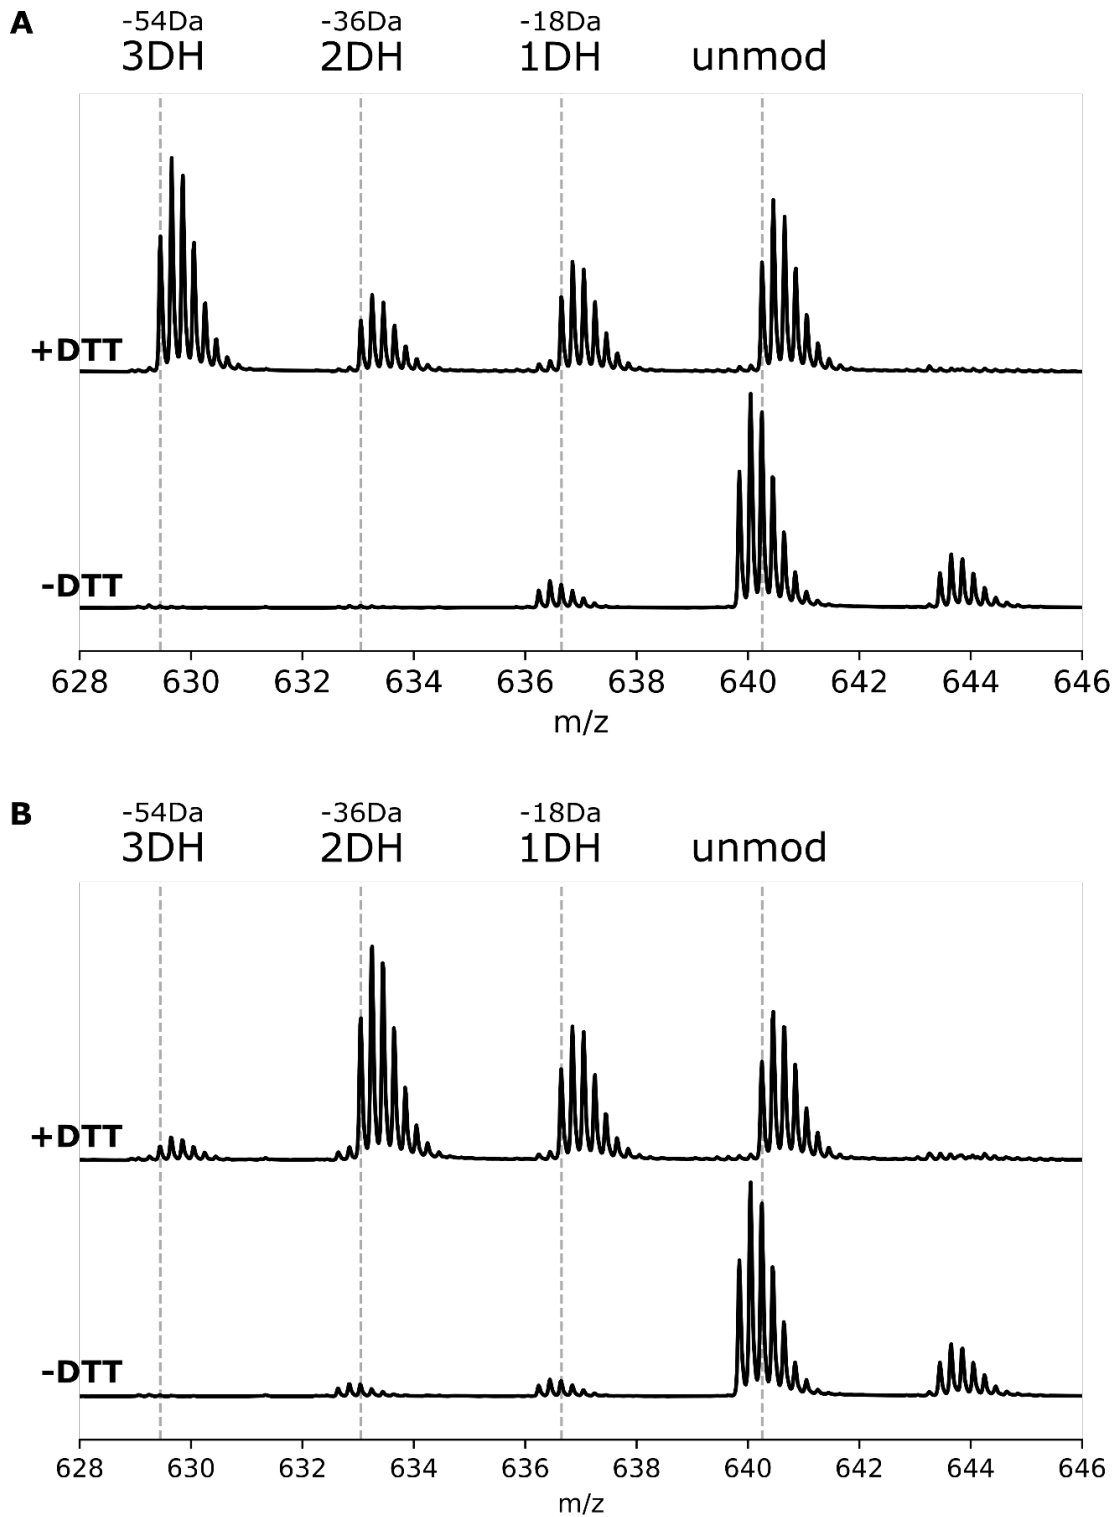

**Figure S42:** Trypsin digestion of AmdA **(A)** II-disulfide and **(B)** III-disulfide variants modified by His<sub>6</sub>-SUMO-AmdB *in vitro*. These results show that DTT effectively prevents a disulfide bond from forming during the reaction. See also Fig. 6A in the main text.

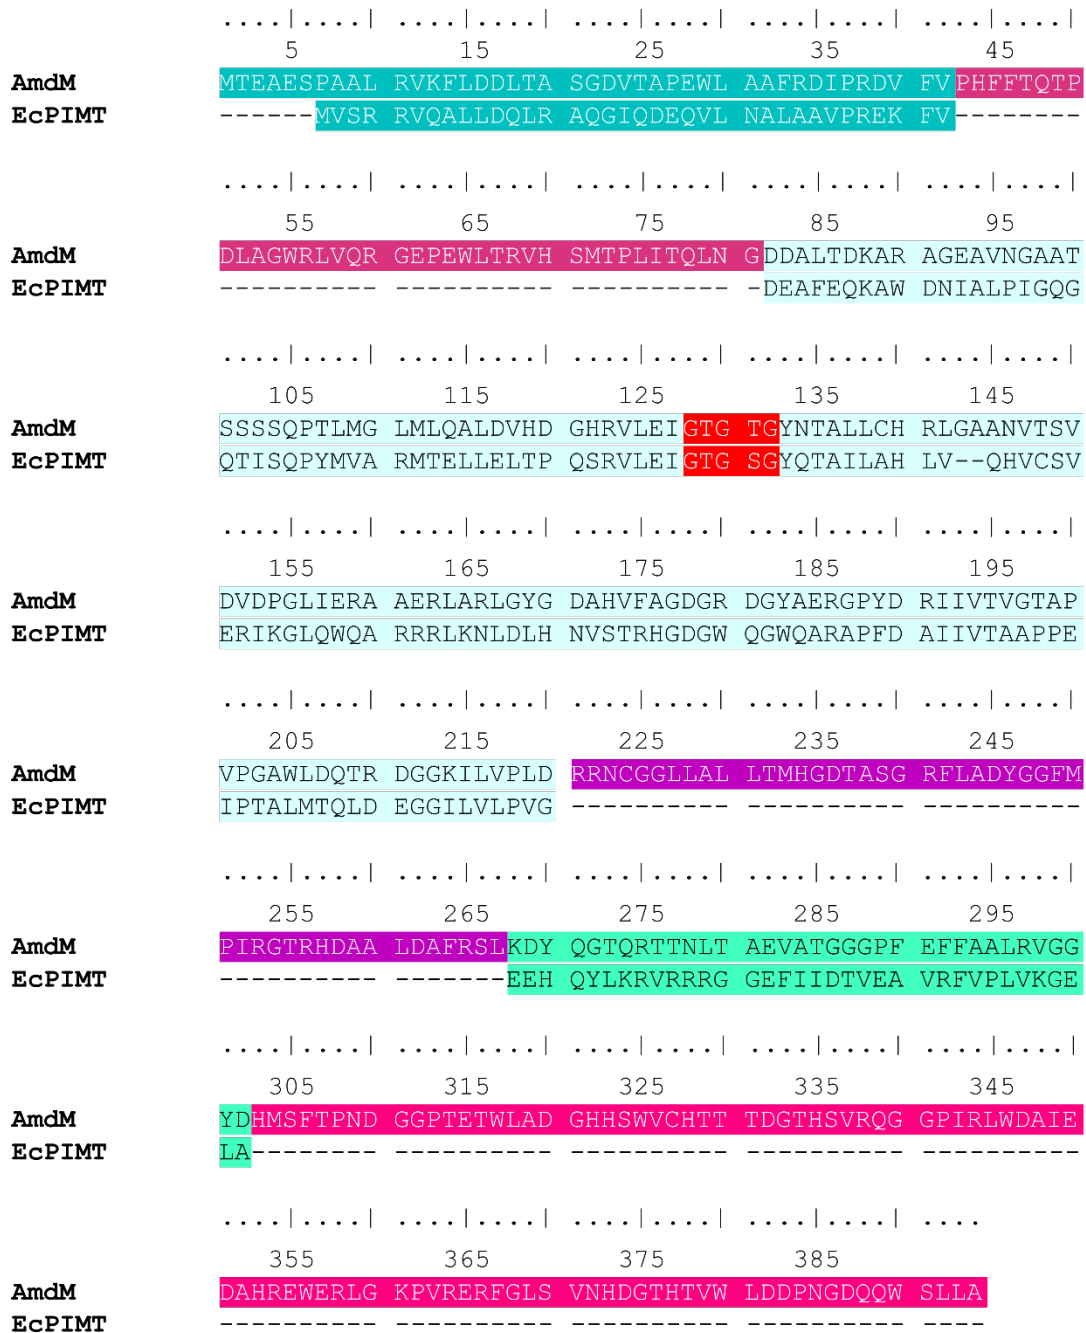

**Figure S43:** ClustalW sequence alignment of AmdM and EcPIMT. The background colors behind the sequences correspond to the colors of the protein structures shown in Fig. 7B (refer to the main text). In general, colors in a blue or green tone represent a segment of AmdM or EcPIMT sequence showing homology, and colors in a magenta tone represent a segment of AmdM sequence that is unique. The red GXXGX sequence is known to be a SAM binding site.

## Supplementary Tables

**Table S1:** AmdA and its 29 homologs used for MEME.

|    | Accession Number | Origin                                                    | Protein Sequence                                                                                                                                     |
|----|------------------|-----------------------------------------------------------|------------------------------------------------------------------------------------------------------------------------------------------------------|
| 0  | WP_141997876.1   | <i>Amycolatopsis cihanbeyliensis</i>                      | MPVHQHERPTEGAFSSGHFPLGRRFGMVDTAPEPASVPRPFGLTLGTRP<br>RQVTPPLNPADIGYDEDAQMGMLRDDGGQLVPMRHTDGQNTVTVDGGDGRY<br>TNKDSDDHRED                              |
| 1  | MPZ83135.1       | <i>Actinophytocola</i> sp.                                | MPLQQHERPTGAGVFPSSDHFPLGRRFGVVDATPEPASPMRPFGLTLGTRP<br>RQVTPPLNPADIGYDENAQVGLIRDDDGQLVVRMGRHTDGQGTVTVDKGGQS<br>TNKDSDDHRED                           |
| 2  | MBV9314006.1     | <i>Pseudonocardia</i> sp.                                 | MPVELHERRTGAGFLSSDHFPLGRAYGHVNTTAESATLARPFGLTLAVRP<br>RRVARLNPADLVYDEQNVGLIRDGDELIKMGRHTDGQNTQTNADGQNGP<br>DSDTDWRED                                 |
| 3  | WP_132875576.1   | <i>Tamarichabitans halophyticus</i>                       | MSIAKPEGRPGSVVFPASDQFPLGRAYGRVDSTGEPASTARPFGLTLGVPR<br>KRVDRLNLAELSYDEEAQVGLLRHGGELVRLGRHTDGQNTQTNSDGHQGY<br>DSDTDHRED                               |
| 4  | PZS38665.1       | <i>Pseudonocardiales</i> bacterium                        | MVDAAGTQRKAHHMKSREHPTGAVLCPTSDHFPLGRAYGRIDATPAPASDL<br>RPFGLTLAVQPATSVRLDPAELGHDDVRKIGLIREGGKEMVPLSKHSDGST<br>STLTDADGGGRDSDTDHRED                   |
| 5  | MBV9010918.1     | <i>Pseudonocardiales</i> bacterium                        | MSRTPFLPASDHFPLGRAYGCVQATPCPASGVRPFGLTLAVAPSAVRFDPG<br>ELGYDDIRQVGLIRDGEMVPLARHTDGQNTLTNADGGGYDSDTDWRED                                              |
| 6  | WP_207125195.1   | <i>Actinocatenispora comari</i>                           | MYPTDAIDPLSTAPDQFSLGRPTALPHGDTAVSSAPRPFGLTLAVEPNEVE<br>AIDLEALS YDTERQIALIRDSQVVPARHTDGRTSTSTASRDGTPQDGDSD<br>DVRED                                  |
| 7  | BCJ32534.1       | <i>Actinocatenispora thailandica</i>                      | MHVNTTDSLSSTTPDQFPLGRSALPLATGIGSAACRPFGLTLAVAPAETA<br>AIELDALSYDADRQIGLIHGDQVVPARHTDGRTSTTTASRDGTPQDGDAD<br>VRED                                     |
| 8  | GID14923.1       | <i>Actinocatenispora rupis</i>                            | MPATPTASAPVFRPDWLFQKEGRCAHPGSPRSEYDVHVLTPTCDPLSTVTD<br>EFPLGRPALPLGDNEMPTAARPFVTLAVEPTTVEPIDVNALS YDTHRQVG<br>MIRDGELVPLARHTDGRTSTTTASRDGTPQDGEDTRED |
| 9  | WP_203662960.1   | <i>Actinocatenispora rupis</i>                            | MFRPDWLFQKEGRCAHPGSPRSEYDVHVLTPTCDPLSTVTDDEFPLGRPALP<br>LGDNEMPTAARPFVTLAVEPTTVEPIDVNALS YDTHRQVGMIRDGELVPL<br>LARHTDGRTSTTTASRDGTPQDGEDTRED         |
| 10 | WP_203965230.1   | <i>Actinocatenispora thailandica</i>                      | MGSAACRPFGLTLAVAPAETA AIELDALSYDADRQIGLIHGDQVVPARH<br>TDGRTSTTTASRDGTPQDGDADVRED                                                                     |
| 11 | MBN1173025.1     | <i>Micromonosporaceae</i><br>bacterium                    | MPTPASTADPLYPVSNQFPLGRPFGLIPSGTDATLPAALPFGLRLAVTTPA<br>ADIGDL SHYGYDHDQQIGVLHTEQGTVPLARHTTGQTRTVTHPDGHRGPD<br>DQDVRED                                |
| 12 | WP_221083949.1   | <i>Micromonospora tarapacensis</i>                        | MLATTVPGRAGPADAARAPEADPLYPASGLFPLGRPFGLLPESEVCPPEEL<br>LFFGLRRAVVGKPLPVGDL SAGYDHDQQIGTVRDGTVVPLMRHTTGQTS<br>TTNADG HKGPDSDTDHRED                    |
| 13 | OJF13460.1       | <i>Couchioplanes caeruleus</i><br>subsp. <i>caeruleus</i> | MSPTAPVLSVPVTDPLYPAAAGFLPLGRPLGAVDGDMAPTSDRRPFGLR<br>FAVVP AHPIPVDLTTVRYDPRQMAVDTTGAPVLGKHSTGATSTRTSDGHK<br>SMDSDDHTED                               |
| 14 | MBT8225494.1     | <i>Dactylosporangium</i> sp.                              | MDTLTSPMTDPLYPTNGQFPLGRPFGLIMPGGTDATPAEALPFGLRLAVTAP<br>AAD IENLD RYGYDHRHQIGVVHTSGAVPLARHTTGQTRTVHAPDGHGRPD<br>TDQDVRED                             |
| 15 | WP_211277811.1   | <i>Couchioplanes caeruleus</i>                            | MTDDPLYPAAGFLPLGRPLGAVDGDMAPTSDRRPFGLRFAVVP AHPIPV<br>DLTTVRYDPRQMAVDTTGAPVLGKHSTGATSTRTSDGHKSMDSDDHTED                                              |
| 16 | WP_018831371.1   | <i>Salinispora tropica</i>                                | MTDDPLYPTAGHLPLGRPLDAVGSDDVRSSTDRRPFALRFATVPARPI<br>VNLTTVRYDPRQMSVDPTGTPILGKHSTGATSTRTSDGHKSMDSDDHTED                                               |
| 17 | WP_027661194.1   | <i>Salinispora fenicalii</i>                              | MSPTSPVLSRPVTDPLYPYTAGYLPGRPLDAVGSDDQAQPSSTDRRPFGLR<br>RFATVPARPIPVNLTTVRYDPRQMSVDPTGTPVLGKHSTGATSTRTSDGH<br>KSMDSDDHTED                             |
| 18 | WP_028193085.1   | <i>Salinispora pacifica</i>                               | MTDDPLYPTAGYLPGRPLDAVGSDDVQPSPTDRRPFALRFATVPARPI<br>VNLTTVRYDPRQMSVDPTGTPVLGKHSTGATSTRTSDGHRSMDSDDHTED                                               |
| 19 | WP_019900531.1   | <i>Salinispora arenicola</i>                              | MAEDPLYPAAGYLPGRPLDAVSSDDVQPTSDRRRPFALRFATVPARPI<br>VDLTTVRYDPRQMSVDRTGTPVLGKHSTGATSTRTSDGHKSMADDDHTED                                               |
| 20 | ABP54871.1       | <i>Salinispora tropica</i> CNB-440                        | MSPTSPVLSRPVTDPLYPYTAGYLPGRPLDAVGSDDVRSSTDRRPFALR<br>RFATVPARPIPVNLTTVRYDPRQMSVDPTGTPILGKHSTGATSTRTSDGH<br>KSMDSDDHTED                               |
| 21 | WP_028565500.1   | <i>Salinispora tropica</i>                                | MTDDPLYPTAGYLPGRPLDAVGSDDVRSSTDRRPFALRFATVPARPI<br>VNLTTVRYDPRQMSVDPTGTPILGKHSTGATSTRTSDGHKSMDSDDHTED                                                |

|    |                |                         |                                                                                                                               |
|----|----------------|-------------------------|-------------------------------------------------------------------------------------------------------------------------------|
| 22 | MPZ85240.1     | Actinophytocola sp.     | MSANTEALPGAHGIFPLGAYRGSTTVRDEPAARPFGLRFAAPPQPCESVPA<br>ADFSSWDYDPDRQIAVVTEDEGSRIEAAKHSTGPTQTPTNTGDGTRFERDE<br>VTEDE           |
| 23 | WP_018790314.1 | Salinispora arenicola   | MAEDPLYPAAGYLPLGRPLDAVDSSDDDAQPTSTDRRPFALRFATVFPARPI<br>PVDLTTVRYDPDRQMSVDRTGTPVLGKHSTGATSTRTSBGHKSMDADTDHT<br>ED             |
| 24 | NIL43132.1     | Salinispora arenicola   | MAEDPLYPAAGYLPLGRPLDAVDSSDDDAQPTSTDRRPFALRFATVFPARPI<br>PVDLTTVRYDPDRQMSVDPTGTPVLGKHSTGATSTRTSBGHKSMDADTDHT<br>ED             |
| 25 | WP_029024809.1 | Salinispora arenicola   | MAEDPLYPAAGYLPLGRPLDAVDSSDDDAQPTSTGRRPFALRFATVFPARPI<br>PVDLTTVRYDPDRQMSVDRTGTPVLGKHSTGATSTRTSBGHKSMDADTDHT<br>ED             |
| 26 | TQL38569.1     | Salinispora arenicola   | MFPTNPVLPSPMAEDPLYPAAGYLPLGRPLDAVDSSDDDAQPTSTGRRPFA<br>LRFATVFPARPI PVDLTTVRYDPDRQMSVDRTGTPVLGKHSTGATSTRTSBG<br>HKSMDADTDHTED |
| 27 | MBI1759089.1   | Actinomycetia bacterium | MGQFGLGRPFGLLPTSERVCAVEALPFGLRRAMVAATVSVGDLISAYGYDHD<br>RQIGVIRDGDQEVPLLKHTTGQTRTTNPDGQKGPDSVDVQRED                           |
| 28 | WP_038841753.1 | Salinispora arenicola   | MAEDPLYPAAGYLPLGRPLDAVDSSDDDAQASSTDRRPFALRFATVFPARPI<br>PVDLTTVRYDPDRQMSVDRTGTPVLGKHSTGATSTRTSBGHKSMDADTDHT<br>ED             |
| 29 | NYT94749.1     | Salinispora sp. H7-4    | MGEVWRCPDQPIPLGRPLDAVGSDDDVQPSPTDRRPFALRFATVFPARPIPV<br>NLTTVRYDPDRQLSVDPTGTPVLGKHSTGATSTRTSBGHESMDSDDTDHTED                  |

**Table S2:** Oligonucleotides used in this study.

| Name   | Sequence (5' -> 3')                                         |
|--------|-------------------------------------------------------------|
| oBC026 | GCATGGTCTCTgatccCCCGTACACCAGCAGC                            |
| oBC028 | GCATGGTCTCTgatccGTTGGTGCAGCTCGTTCTGTGCTCGTGCTGAC            |
| oBC029 | CGATGGTCTCaagcttTCACGTCTTGTCGTATCCTC                        |
| oBC031 | CGATGGTCTCaagcttCTATGCGAGTAGGCTCCATTG                       |
| oBC032 | GCATGGTCTCTaattcATTAAGAGGAGAAATTAATatg                      |
| oBC043 | GCATcatatgCGGTGTGAAATACCGCAC                                |
| oBC044 | ACGTGgttctcGCGGTATCATTGC                                    |
| oBC045 | GATACCGCgagaacCACGTTACCGGCTCCAGATTTATC                      |
| oBC046 | CGATggatccGTGATGGTGATG                                      |
| oBC047 | GCATggatccgagaccGAAAGTGAAACGTGATTTTCATGC                    |
| oBC050 | CGATAAGCTTgagaccTCATTTGTAGAGCTCATCCATGC                     |
| oBC054 | CGATGGTCTCaagcttTCAATCCTCCCGATGGTC                          |
| oBC055 | cgcacacattattaataagatttacaaaatgttcaaaatgacgcatgaaatcacgtttc |
| oBC056 | CTTATTTAATAATGTGTGCGgcaattcacatttaattatgaatgttttcttaacatcgc |
| oBC057 | ctagtagctaagatccgaacctgccgtttcttgagttgccgcatgtaagaaaacattc  |
| oBC058 | CGGATCTTAGCTACTAGagaaagaggagaaatactagATGAGCAAAGGAGAAGAAC    |
| oBC064 | GCATGGTCTCTcatgTCGGACTCAGAAGTCAATC                          |
| oBC065 | CGATGGTCTCAgtcacgttctgtcgtatCCTTC                           |
| oBC066 | CGATGGTCTCAcatgATCAATCCTCCCGATGG                            |
| oBC067 | GCATGGTCTCTgaccgaagctgaatccccg                              |
| oBC104 | AATTCATTAAGAGGAGAAATTAATGAGCGGATCGCATCACCATCACCATCAGC       |
| oBC105 | GATCCGTGATGGTATGGTATGCGATCCGCTCATAGTTAATTTCTCCTCTTTAATG     |
| oBC112 | GCATGGTCTCGgatccaccgaagctgaatccccg                          |
| oBC118 | GGCCGCTATCGCGGACGCTTTGGAAGGataccgacaagaca                   |
| oBC119 | gtcatgtcttgcgtatCCTTCAAAGCGTCCGCGATAGC                      |
| oBC120 | GCATaattTgagaccATTAAGAGGAGAAATTAATGaaagtgaaacgtgatttc       |
| oBC121 | CGATgatctgagacctataaacgc                                    |
| oBC122 | CGATGGTCTCaGATCCACCAATCTGTTCTC                              |
| oBC127 | CGATGGTCTCaccacCACGGTGTGGTCTG                               |
| oBC128 | GCATGGTCTCggtggATGGAGGTGACGGCC                              |
| oBC129 | CGATGGTCTCatattTTTGTGGTGTACCGG                              |
| oBC130 | GCATGGTCTCgaataGTGACACCGACCATC                              |
| oBC164 | ggatccgagaccgaaagtgaaac                                     |
| oBC165 | aagcttgagacctataaacgc                                       |
| oBC207 | CGATggtctcaAACGTGACGACTCATCGGG                              |
| oBC208 | GCATggtctcaCGTTGACGGCCAGACCAAC                              |
| oBC209 | CGATggtctcaGTTCTCCCGATGGTCGG                                |
| oBC210 | GCATggtctcaGAACTGATcatgTCGGACTCAG                           |
| oBC228 | CGATggtctcaCATTACCTCCATCGGTCAC                              |
| oBC229 | GCATggtctcaAATGGCCGGTACACCAAC                               |
| oBC230 | CGATggtctcAaccaCCATCATCGGTCACGGTGTTG                        |
| oBC231 | GCATggtctcAtggtGGCCGGTACACCAAC                              |
| oBC232 | CGATggtctcAaccaTCACCATCGGTCACGGTGTTG                        |
| oBC233 | CGATggtctcAaccaTCCCGACCTCCATCGGTCAC                         |
| oBC234 | GCATggtctcAtggtTACACCAACAAAGACAGTGAC                        |
| oBC240 | CGATggtctcAgagcGTCACCTCCATCGGTCAC                           |
| oBC241 | GCATggtctcAgctcGGTACACCAACAAAGACAGTG                        |
| oBC255 | CGATggtctcAgaccGCCGTACCTCCATC                               |
| oBC256 | GCATGGTCTCGggtcGGTACACCAACAAAGAC                            |



|        |                                                           |
|--------|-----------------------------------------------------------|
| oBC259 | CGATggtctcAgaccgtcaccACCTCCATCGGTAC                       |
| oBC260 | CGATggtctcAgaccaccgtcaccACCTCCATCGGTAC                    |
| oBC264 | CGATggtctcAggggTGCACCTCCATCGGTG                           |
| oBC265 | GCATggtctcTaccGGTACACCAACAAAGAC                           |
| oBC266 | CGATggtctcAgagaGTCACCTCCATCGGTG                           |
| oBC267 | GCATggtctcTtctcGGTACACCAACAAAGAC                          |
| oBC271 | GCATGGTCTCTgatccCCCGTACACC                                |
| oBC276 | CGATggtctcAcgcaGTGACGACTCATCGGG                           |
| oBC277 | GCATggtctcTtgcgACGGCCAGACCAAC                             |
| oBC278 | CGATggtctcAagctTTCAGCACTCCCGATGGTCGGTG                    |
| oBC302 | CGATGGTCTCTtaacCTGGCCGTCCGTGTG                            |
| oBC303 | GCATGGTCTCTgtaACACCGTGACCGATG                             |
| oBC304 | CGATGGTCTCTcaacGTTGGTCTGGCCGTG                            |
| oBC305 | GCATGGTCTCTgttgTGACCGATGGAGGTG                            |
| oBC306 | CGATGGTCTCTgttACTGTCTTTGTTGGTGTACC                        |
| oBC307 | GCATGGTCTCTaacaCCGACCATCGGG                               |
| oBC308 | CGATGGTCTCTggttGGTGTCACTGTCTTTGTTG                        |
| oBC309 | GCATGGTCTCTaaccATCGGGAGGATTGATC                           |
| oBC318 | CGATGGTCTCTcacaCACGGTGTTGGTCTG                            |
| oBC319 | TGTGATGGAGGTGACGGCCGGTACACCAACAAA                         |
| oBC320 | TACATTTGTTGGTGTACCGCCGTACCTCCAT                           |
| oBC321 | GCATGGTCTCTgtaGTGACACCGACCATC                             |
| oBC326 | GTTAACGTTGTGACCGATGGAGGTGACGGCCGGTACACCAACAAAGACAGTAACACC |
| oBC327 | GGTTGGTGTACTGTCTTTGTTGGTGTACCGCCGTACCTCCATCGGTACAAACGT    |
| oBC340 | CGATGGTCTCaagctTCAATCCTCCCGATG                            |
| oBC341 | CGATGGTCTCTcatgATCAGCACTCCCGATG                           |
| oBC342 | CGATGGTCTCTcacaGTTGGTCTGGCCGTG                            |
| oBC343 | TGTGTGACCGATGGAGGTGACGGCCGGTACACCAACAAAGACAGT             |
| oBC344 | TACAAGTGTCTTTGTTGGTGTACCGCCGTACCTCCATCGGTCA               |
| oBC345 | GCATGGTCTCTgtaCCGACCATCGGGAG                              |
| oBC346 | CGATGGTCTCTtacaCTGGCCGTCCGTG                              |
| oBC347 | TGTAACACCGTGACCGATGGAGGTGACGGCCGGTACACCAACAAAGACAGTGACACC |
| oBC348 | GACAGGTGTCACTGTCTTTGTTGGTGTACCGCCGTACCTCCATCGGTACGGTGT    |
| oBC349 | GCATGGTCTCTgtcATCGGGAGGATTGATcatg                         |

**Table S3:** Plasmids used and generated in this study.

| Plasmid      | Description and Purpose                                                                                                                                                                              | Source                                 |
|--------------|------------------------------------------------------------------------------------------------------------------------------------------------------------------------------------------------------|----------------------------------------|
| pQE-80       | Expression vector with T5 promoter and AmpR marker                                                                                                                                                   |                                        |
| pRSFDuet-1   | Dual expression vector with T7 promoter and KanR marker, only MCS1 site used in this study                                                                                                           |                                        |
| pWC108       | <i>panA</i> -LVPRGS-sfGFP-His, <i>panBCD</i> pQE-80; used in this study to amplify sfGFP                                                                                                             | Cheung-Lee, et al. (2019) <sup>5</sup> |
| pYTK96       | Yeast Toolkit (YTK) plasmid used for assembling a gene expression cassette to be integrated into the URA3 locus of <i>Saccharomyces cerevisiae</i> BY4741; used in this study to amplify PglpT-ffGFP | Lee, et al. (2015) <sup>6</sup>        |
| pET-28b-SUMO | Expression vector with KanR marker for N-terminal SUMO-tag fusion of a protein                                                                                                                       | Darst Lab                              |
| pBC011       | <i>amdABM</i> ; His <sub>6</sub> -mAmdA <sup>BM</sup> biosynthesis; Native AmdB CDS; MRGSHHHHHHGS His <sub>6</sub> -tag used                                                                         | This study                             |
| pBC015       | <i>amdA</i> ; His <sub>6</sub> -AmdA (unmodified) biosynthesis; MRGSHHHHHHGS His <sub>6</sub> -tag used                                                                                              | This study                             |
| pBC016       | <i>amdB</i> ; His <sub>6</sub> -AmdB expression for purification and <i>in vitro</i> reaction                                                                                                        | This study                             |
| pBC019       | <i>amdAB</i> ; His <sub>6</sub> -mAmdA <sup>B</sup> biosynthesis; Native AmdB CDS; MRGSHHHHHHGS His <sub>6</sub> -tag used                                                                           | This study                             |
| pBC022       | Modified pQE-80L with MCS replaced by sfGFP constitutive expression cassette flanked by <i>Bsal</i> sites; <i>Bsal</i> site in AmpR ablated                                                          | This study                             |
| pBC026       | <i>amdB</i> ; His <sub>6</sub> -SUMO-AmdB expression for purification and <i>in vitro</i> reaction                                                                                                   | This study                             |
| pBC031       | <i>amdABM</i> ; His <sub>6</sub> -mAmdA <sup>BM</sup> biosynthesis; MRGSHHHHHHGS His <sub>6</sub> -tag used                                                                                          | This study                             |
| pBC032       | <i>amdAB</i> ; His <sub>6</sub> -mAmdA <sup>B</sup> biosynthesis; MRGSHHHHHHGS His <sub>6</sub> -tag used                                                                                            | This study                             |
| pBC043       | Modified pBC022 with His <sub>6</sub> -tag modified to MSGSHHHHHHGS                                                                                                                                  | This study                             |
| pBC044       | <i>amdABM</i> ; His <sub>6</sub> -mAmdA <sup>BM</sup> biosynthesis                                                                                                                                   | This study                             |
| pBC045       | <i>amdAB</i> ; His <sub>6</sub> -mAmdA <sup>B</sup> biosynthesis                                                                                                                                     | This study                             |
| pBC050       | His <sub>6</sub> -AmdM expression for purification and <i>in vitro</i> reaction                                                                                                                      | This study                             |
| pBC051       | <i>amdABM</i> ; His <sub>6</sub> -mAmdA <sup>BM</sup> biosynthesis                                                                                                                                   | This study                             |
| pBC052       | ffGFP- <i>amdBM</i> ; Entry vector for a His <sub>6</sub> -AmdA variant co-expression with SUMO-AmdB and AmdM                                                                                        | This study                             |
| pBC054       | <i>amdA</i> ; His <sub>6</sub> -AmdA (unmodified) biosynthesis                                                                                                                                       | This study                             |
| pBC071       | <i>amdABM</i> ; His <sub>6</sub> -mAmdA(T10V) <sup>BM</sup> biosynthesis                                                                                                                             | This study                             |
| pBC072       | <i>amdABM</i> ; His <sub>6</sub> -mAmdA(D21N) <sup>BM</sup> biosynthesis                                                                                                                             | This study                             |
| pBC108       | Modified pQE-80 with MCS replaced by ffGFP constitutive expression cassette flanked by <i>Bsal</i> sites; <i>Bsal</i> recognition sequence in AmpR ablated; 6XHis-tag modified to MSGSHHHHHHGS       | This study                             |
| pBC123       | His <sub>6</sub> -AmdA(T2V) in <i>amdABM</i> , for cloning His <sub>6</sub> -mAmdA(T2V, D29N)                                                                                                        | This study                             |
| pBC133       | ffGFP- <i>amdB</i> ; Entry vector for His <sub>6</sub> -AmdA variant co-expression with SUMO-AmdB; 6XHis-tag: MSGSHHHHHHGS                                                                           | This study                             |
| pBC135       | <i>amdAB</i> ; His <sub>6</sub> -mAmdA(D14N) <sup>B</sup> biosynthesis                                                                                                                               | This study                             |
| pBC136       | <i>amdABM</i> ; His <sub>6</sub> -mAmdA(D14N) <sup>BM</sup> biosynthesis                                                                                                                             | This study                             |
| pBC137       | <i>amdABM</i> ; His <sub>6</sub> -mAmdA(G12D, D14G) <sup>BM</sup> biosynthesis                                                                                                                       | This study                             |
| pBC138       | <i>amdABM</i> ; His <sub>6</sub> -mAmdA(G13D, D14G) <sup>BM</sup> biosynthesis                                                                                                                       | This study                             |
| pBC139       | <i>amdABM</i> ; His <sub>6</sub> -mAmdA(D14R, G15D, R16G) <sup>BM</sup> biosynthesis                                                                                                                 | This study                             |
| pBC140       | <i>amdAB</i> ; His <sub>6</sub> -mAmdA(G12D, D14G) <sup>B</sup> biosynthesis                                                                                                                         | This study                             |
| pBC141       | <i>amdAB</i> ; His <sub>6</sub> -mAmdA(G13D, D14G) <sup>B</sup> biosynthesis                                                                                                                         | This study                             |
| pBC142       | <i>amdAB</i> ; His <sub>6</sub> -mAmdA(D14R, G15D, R16G) <sup>B</sup> biosynthesis                                                                                                                   | This study                             |
| pBC147       | <i>amdABM</i> ; His <sub>6</sub> -mAmdA(G15A) <sup>BM</sup> biosynthesis                                                                                                                             | This study                             |
| pBC148       | <i>amdAB</i> ; His <sub>6</sub> -mAmdA(G15A) <sup>B</sup> biosynthesis                                                                                                                               | This study                             |
| pBC156       | <i>amdA</i> ; His <sub>6</sub> -AmdA(T2C, D29C) expression                                                                                                                                           | This study                             |

|        |                                                                                          |            |
|--------|------------------------------------------------------------------------------------------|------------|
| pBC163 | <i>amdABM</i> ; His <sub>6</sub> -mAmdA(+G16) <sup>BM</sup> biosynthesis                 | This study |
| pBC167 | <i>amdAB</i> ; His <sub>6</sub> -mAmdA(+G16) <sup>B</sup> biosynthesis                   | This study |
| pBC169 | <i>amdABM</i> ; His <sub>6</sub> -mAmdA(+G14) <sup>BM</sup> biosynthesis                 | This study |
| pBC170 | <i>amdABM</i> ; His <sub>6</sub> -mAmdA(+G14+G16) <sup>BM</sup> biosynthesis             | This study |
| pBC172 | <i>amdABM</i> ; His <sub>6</sub> -mAmdA(G15T) <sup>BM</sup> biosynthesis                 | This study |
| pBC173 | <i>amdABM</i> ; His <sub>6</sub> -mAmdA(G15S) <sup>BM</sup> biosynthesis                 | This study |
| pBC174 | <i>amdAB</i> ; His <sub>6</sub> -mAmdA(G15T) <sup>B</sup> biosynthesis                   | This study |
| pBC175 | <i>amdAB</i> ; His <sub>6</sub> -mAmdA(G15S) <sup>B</sup> biosynthesis                   | This study |
| pBC201 | His <sub>6</sub> -mAmdA(T6V) in <i>amdAB</i> , for cloning AmdA(T6V, D25N)               | This study |
| pBC202 | <i>amdAB</i> ; His <sub>6</sub> -mAmdA(T8V) <sup>B</sup> biosynthesis                    | This study |
| pBC203 | <i>amdAB</i> ; His <sub>6</sub> -mAmdA(T10V) <sup>B</sup> biosynthesis                   | This study |
| pBC204 | <i>amdAB</i> ; His <sub>6</sub> -mAmdA(D21N) <sup>B</sup> biosynthesis                   | This study |
| pBC205 | <i>amdAB</i> ; His <sub>6</sub> -mAmdA(D23N) <sup>B</sup> biosynthesis                   | This study |
| pBC206 | <i>amdAB</i> ; His <sub>6</sub> -mAmdA(D25N) <sup>B</sup> biosynthesis                   | This study |
| pBC208 | <i>amdABM</i> ; His <sub>6</sub> -mAmdA(T8V) <sup>BM</sup> biosynthesis                  | This study |
| pBC209 | <i>amdABM</i> ; His <sub>6</sub> -mAmdA(D23N) <sup>BM</sup> biosynthesis                 | This study |
| pBC210 | <i>amdABM</i> ; His <sub>6</sub> -mAmdA(D25N) <sup>BM</sup> biosynthesis                 | This study |
| pBC215 | <i>amdAB</i> ; His <sub>6</sub> -mAmdA(T10C, D21C) <sup>B</sup> biosynthesis             | This study |
| pBC216 | <i>amdAB</i> ; His <sub>6</sub> -mAmdA(T10V, D21N) <sup>B</sup> biosynthesis             | This study |
| pBC217 | <i>amdAB</i> ; His <sub>6</sub> -mAmdA(T8V, D23N) <sup>B</sup> biosynthesis              | This study |
| pBC218 | <i>amdAB</i> ; His <sub>6</sub> -mAmdA(T6V, D25N) <sup>B</sup> biosynthesis              | This study |
| pBC219 | <i>amdAB</i> ; His <sub>6</sub> -mAmdA(T2V, D29N) <sup>B</sup> biosynthesis              | This study |
| pBC220 | <i>amdABM</i> ; His <sub>6</sub> -mAmdA(T10V, D21N) <sup>BM</sup> biosynthesis           | This study |
| pBC221 | <i>amdABM</i> ; His <sub>6</sub> -mAmdA(T8V, D23N) <sup>BM</sup> biosynthesis            | This study |
| pBC222 | <i>amdABM</i> ; His <sub>6</sub> -mAmdA(T6V, D25N) <sup>BM</sup> biosynthesis            | This study |
| pBC223 | <i>amdABM</i> ; His <sub>6</sub> -mAmdA(T2V, D29N) <sup>BM</sup> biosynthesis            | This study |
| pBC226 | <i>amdAB</i> ; His <sub>6</sub> -mAmdA(T6V, T8V, D23N, D25N) <sup>B</sup> biosynthesis   | This study |
| pBC231 | <i>amdABM</i> ; His <sub>6</sub> -mAmdA(T6V, T8V, D23N, D25N) <sup>BM</sup> biosynthesis | This study |
| pBC238 | <i>amdAB</i> ; His <sub>6</sub> -mAmdA(T2V, T8V, D23N, D29N) <sup>B</sup> biosynthesis   | This study |
| pBC239 | <i>amdABM</i> ; His <sub>6</sub> -mAmdA(T2V, T8V, D23N, D29N) <sup>BM</sup> biosynthesis | This study |
| pBC242 | <i>amdA</i> ; His <sub>6</sub> -mAmdA(T10C, D21C) expression                             | This study |
| pBC243 | <i>amdAB</i> ; His <sub>6</sub> -mAmdA(T8C, D23C) <sup>B</sup> biosynthesis              | This study |
| pBC244 | <i>amdAB</i> ; His <sub>6</sub> -mAmdA(T6C, D25C) <sup>B</sup> biosynthesis              | This study |
| pBC245 | <i>amdA</i> ; His <sub>6</sub> -mAmdA(T8C, D23C) expression                              | This study |
| pBC246 | <i>amdA</i> ; His <sub>6</sub> -mAmdA(T6C, D25C) expression                              | This study |
| pBC247 | <i>amdAB</i> ; His <sub>6</sub> -mAmdA(T2C, D29C) <sup>B</sup> biosynthesis              | This study |
| pBC248 | <i>amdAB</i> ; His <sub>6</sub> -mAmdA(+G14) <sup>B</sup> biosynthesis                   | This study |
| pBC249 | <i>amdAB</i> ; His <sub>6</sub> -mAmdA(+G14+G16) <sup>B</sup> biosynthesis               | This study |

**Table S4:** Plasmids used in this study and their construction methodology.

| Plasmid | Preparation Method for the Insert(s)                                                                                                                           | Vector       | Assembly Method                                                                          |
|---------|----------------------------------------------------------------------------------------------------------------------------------------------------------------|--------------|------------------------------------------------------------------------------------------|
| pBC011  | Insert 11-1: PCR on <i>A. cihanbeyliensis</i> DSM 45679 genomic DNA (German Collection of Microorganisms and Cell Cultures, DSMZ) using oBC026 and oBC031      | pQE-80       | Golden Gate Assembly (GGA) (pQE-80L pre-digested with <i>Bam</i> HI and <i>Hind</i> III) |
| pBC015  | Insert 15-1: PCR on pBC011 using oBC026 and oBC054                                                                                                             | pQE-80       | Restriction digestion and ligation using <i>Bam</i> HI and <i>Hind</i> III               |
| pBC016  | Insert 16-1: PCR on pBC011 using oBC028 and oBC029                                                                                                             | pQE-80       | GGA (pQE-80L pre-digested with <i>Bam</i> HI and <i>Hind</i> III)                        |
| pBC019  | Insert 19-1: PCR on pBC011 using oBC026 and oBC029                                                                                                             | pQE-80       | GGA (pQE-80L pre-digested with <i>Bam</i> HI and <i>Hind</i> III)                        |
| pBC022  | Refer to pages 4-5 of this document                                                                                                                            | pQE-80       | Refer to pages 4-5 of this document                                                      |
| pBC026  | Insert 26-1: PCR on pBC011 using oBC028 and oBC029                                                                                                             | pET-28b-SUMO | Restriction digestion and ligation using <i>Bam</i> HI and <i>Hind</i> III               |
| pBC031  | Insert 31-1: PCR on pBC020 using oBC026 and oBC066<br>Insert 31-2: PCR on pBC026 using oBC064 and oBC065<br>Insert 31-3: PCR on pBC020 using oBC067 and oBC031 | pBC022       | GGA                                                                                      |
| pBC032  | Insert 32-1: PCR on pBC020 using oBC026 and oBC066<br>Insert 32-2: PCR on pBC026 using oBC064 and oBC029                                                       | pBC022       | GGA                                                                                      |
| pBC043  | Insert 43-1: oBC104 and oBC105 annealed                                                                                                                        | pBC022       | Restriction digestion and ligation using <i>Bam</i> HI and <i>Eco</i> RI                 |
| pBC044  | Insert 44-1: PCR on pBC031 using oBC026 and oBC031                                                                                                             | pBC043       | GGA                                                                                      |
| pBC045  | Insert 45-1: PCR on pBC031 using oBC026 and oBC029                                                                                                             | pBC043       | GGA                                                                                      |
| pBC050  | Insert 50-1: PCR on pBC011 using oBC112 and oBC031                                                                                                             | pBC043       | GGA                                                                                      |
| pBC051  | Insert 51-1: PCR on pBC011 using oBC067 and oBC031<br>Insert 51-2: oBC118 and oBC119 annealed                                                                  | pBC044       | GGA (pBC044 pre-digested with <i>Not</i> I and <i>Hind</i> III)                          |
| pBC052  | Insert 52-1: PCR on pYTK96 <sup>[1]</sup> using oBC120 and oBC121                                                                                              | pBC051       | GGA (pBC051 pre-digested with <i>Bam</i> HI and <i>Eco</i> RI)                           |
| pBC054  | Insert 54-1: oBC104 and oBC105 annealed                                                                                                                        | pBC015       | Restriction digestion and ligation using <i>Bam</i> HI and <i>Eco</i> RI                 |
| pBC071  | Insert 71-1: PCR on pBC044 using oBC032 and oBC127<br>Insert 71-2: PCR on pBC044 using oBC128 and oBC122                                                       | pBC052       | GGA                                                                                      |
| pBC072  | Insert 72-1: PCR on pBC044 using oBC032 and oBC129<br>Insert 72-2: PCR on pBC044 using oBC130 and oBC122                                                       | pBC052       | GGA                                                                                      |
| pBC108  | Insert 108-1: PCR on pYTK96 <sup>[1]</sup> using oBC164 and oBC165                                                                                             | pBC043       | GGA (pBC043 pre-digested with <i>Bam</i> HI and <i>Hind</i> III)                         |
| pBC123  | Insert 123-1: PCR on pBC044 using oBC032 and oBC207<br>Insert 123-2: PCR on pBC044 using oBC208 and oBC122                                                     | pBC052       | GGA                                                                                      |
| pBC133  | Insert 133-1: PCR on pYTK96 <sup>[1]</sup> using oBC120 and oBC121                                                                                             | pBC045       | GGA (pBC045 pre-digested with <i>Bam</i> HI and <i>Hind</i> III)                         |
| pBC135  | Insert 135-1: PCR on pBC051 using oBC032 and oBC228<br>Insert 135-2: PCR on pBC051 using oBC229 and oBC122                                                     | pBC133       | GGA                                                                                      |
| pBC136  | Insert 136-1: PCR on pBC051 using oBC032 and oBC228<br>Insert 136-2: PCR on pBC051 using oBC229 and oBC122                                                     | pBC052       | GGA                                                                                      |
| pBC137  | Insert 137-1: PCR on pBC051 using oBC032 and oBC230<br>Insert 137-2: PCR on pBC051 using oBC231 and oBC122                                                     | pBC052       | GGA                                                                                      |
| pBC138  | Insert 138-1: PCR on pBC051 using oBC032 and oBC232<br>Insert 138-2: PCR on pBC051 using oBC231 and oBC122                                                     | pBC052       | GGA                                                                                      |
| pBC139  | Insert 139-1: PCR on pBC051 using oBC032 and oBC233<br>Insert 139-2: PCR on pBC051 using oBC234 and oBC122                                                     | pBC052       | GGA                                                                                      |
| pBC140  | Insert 140-1: PCR on pBC051 using oBC032 and oBC230<br>Insert 140-2: PCR on pBC051 using oBC231 and oBC122                                                     | pBC133       | GGA                                                                                      |
| pBC141  | Insert 141-1: PCR on pBC051 using oBC032 and oBC232<br>Insert 141-2: PCR on pBC051 using oBC231 and oBC122                                                     | pBC133       | GGA                                                                                      |
| pBC142  | Insert 142-1: PCR on pBC051 using oBC032 and oBC233<br>Insert 142-2: PCR on pBC051 using oBC234 and oBC122                                                     | pBC133       | GGA                                                                                      |
| pBC147  | Insert 147-1: PCR on pBC051 using oBC032 and oBC240<br>Insert 147-2: PCR on pBC051 using oBC241 and oBC122                                                     | pBC052       | GGA                                                                                      |
| pBC148  | Insert 148-1: PCR on pBC051 using oBC032 and oBC240                                                                                                            | pBC133       | GGA                                                                                      |

|        |                                                                                                                                                        |        |     |
|--------|--------------------------------------------------------------------------------------------------------------------------------------------------------|--------|-----|
|        | Insert 148-2: PCR on pBC051 using oBC241 and oBC122                                                                                                    |        |     |
| pBC156 | Insert 156-1: PCR on pBC051 using oBC271 and oBC276<br>Insert 156-2: PCR on pBC051 using oBC277 and oBC278                                             | pBC108 | GGA |
| pBC163 | Insert 163-1: PCR on pBC051 using oBC032 and oBC255<br>Insert 163-2: PCR on pBC051 using oBC256 and oBC122                                             | pBC052 | GGA |
| pBC167 | Insert 167-1: PCR on pBC051 using oBC032 and oBC255<br>Insert 167-2: PCR on pBC051 using oBC256 and oBC122                                             | pBC133 | GGA |
| pBC169 | Insert 169-1: PCR on pBC051 using oBC032 and oBC259<br>Insert 169-2: PCR on pBC051 using oBC256 and oBC122                                             | pBC052 | GGA |
| pBC170 | Insert 170-1: PCR on pBC051 using oBC032 and oBC260<br>Insert 170-2: PCR on pBC051 using oBC256 and oBC122                                             | pBC052 | GGA |
| pBC172 | Insert 172-1: PCR on pBC051 using oBC261 and oBC264<br>Insert 172-2: PCR on pBC051 using oBC265 and oBC122                                             | pBC052 | GGA |
| pBC173 | Insert 173-1: PCR on pBC051 using oBC032 and oBC266<br>Insert 173-2: PCR on pBC051 using oBC267 and oBC122                                             | pBC052 | GGA |
| pBC174 | Insert 174-1: PCR on pBC172 using oBC032 and oBC122                                                                                                    | pBC133 | GGA |
| pBC175 | Insert 175-1: PCR on pBC173 using oBC032 and oBC122                                                                                                    | pBC133 | GGA |
| pBC201 | Insert 201-1: PCR on pBC051 using oBC032 and oBC302<br>Insert 201-2: PCR on pBC051 using oBC303 and oBC122                                             | pBC133 | GGA |
| pBC202 | Insert 202-1: PCR on pBC051 using oBC032 and oBC304<br>Insert 202-2: PCR on pBC051 using oBC305 and oBC122                                             | pBC133 | GGA |
| pBC203 | Insert 203-1: PCR on pBC051 using oBC032 and oBC127<br>Insert 203-2: PCR on pBC051 using oBC128 and oBC122                                             | pBC133 | GGA |
| pBC204 | Insert 204-1: PCR on pBC051 using oBC032 and oBC129<br>Insert 204-2: PCR on pBC051 using oBC130 and oBC122                                             | pBC133 | GGA |
| pBC205 | Insert 205-1: PCR on pBC051 using oBC032 and oBC306<br>Insert 205-2: PCR on pBC051 using oBC307 and oBC122                                             | pBC133 | GGA |
| pBC206 | Insert 206-1: PCR on pBC051 using oBC032 and oBC308<br>Insert 206-2: PCR on pBC051 using oBC309 and oBC122                                             | pBC133 | GGA |
| pBC208 | Insert 208-1: PCR on pBC051 using oBC032 and oBC304<br>Insert 208-2: PCR on pBC051 using oBC305 and oBC122                                             | pBC052 | GGA |
| pBC209 | Insert 209-1: PCR on pBC051 using oBC032 and oBC306<br>Insert 209-2: PCR on pBC051 using oBC307 and oBC122                                             | pBC052 | GGA |
| pBC210 | Insert 210-1: PCR on pBC051 using oBC032 and oBC308<br>Insert 210-2: PCR on pBC051 using oBC309 and oBC122                                             | pBC052 | GGA |
| pBC215 | Insert 215-1: PCR on pBC051 using oBC032 and oBC318<br>Insert 215-2: PCR on pBC051 using oBC321 and oBC122<br>Insert 215-3: oBC319 and oBC320 annealed | pBC133 | GGA |
| pBC216 | Insert 216-1: PCR on pBC203 using oBC032 and oBC129<br>Insert 216-2: PCR on pBC203 using oBC130 and oBC122                                             | pBC133 | GGA |
| pBC217 | Insert 217-1: PCR on pBC202 using oBC032 and oBC306<br>Insert 217-2: PCR on pBC202 using oBC307 and oBC122                                             | pBC133 | GGA |
| pBC218 | Insert 218-1: PCR on pBC201 using oBC032 and oBC308<br>Insert 218-2: PCR on pBC201 using oBC309 and oBC122                                             | pBC133 | GGA |
| pBC219 | Insert 219-1: PCR on pBC123 using oBC032 and oBC209<br>Insert 219-2: PCR on pBC123 using oBC210 and oBC122                                             | pBC133 | GGA |
| pBC220 | Insert 220-1: PCR on pBC203 using oBC032 and oBC129<br>Insert 220-2: PCR on pBC203 using oBC130 and oBC122                                             | pBC052 | GGA |
| pBC221 | Insert 221-1: PCR on pBC202 using oBC032 and oBC306<br>Insert 221-2: PCR on pBC202 using oBC307 and oBC122                                             | pBC052 | GGA |
| pBC222 | Insert 222-1: PCR on pBC201 using oBC032 and oBC308<br>Insert 222-2: PCR on pBC201 using oBC309 and oBC122                                             | pBC052 | GGA |
| pBC223 | Insert 223-1: PCR on pBC123 using oBC032 and oBC209<br>Insert 223-2: PCR on pBC123 using oBC210 and oBC122                                             | pBC052 | GGA |
| pBC226 | Insert 226-1: PCR on pBC051 using oBC032 and oBC302<br>Insert 226-2: PCR on pBC051 using oBC309 and oBC122<br>Insert 226-3: oBC326 and oBC327 annealed | pBC133 | GGA |
| pBC231 | Insert 231-1: PCR on pBC051 using oBC032 and oBC302<br>Insert 231-2: PCR on pBC051 using oBC309 and oBC122<br>Insert 231-3: oBC326 and oBC327 annealed | pBC052 | GGA |
| pBC238 | Insert 238-1: PCR on pBC217 using oBC032 and oBC207<br>Insert 238-2: PCR on pBC217 using oBC208 and oBC209                                             | pBC133 | GGA |
| pBC239 | Insert 239-1: PCR on pBC217 using oBC032 and oBC207<br>Insert 239-2: PCR on pBC217 using oBC208 and oBC209                                             | pBC052 | GGA |
| pBC242 | Insert 242-1: PCR on pBC215 using oBC026 and oBC054                                                                                                    | pBC108 | GGA |
| pBC243 | Insert 243-1: PCR on pBC051 using oBC032 and oBC342<br>Insert 243-2: PCR on pBC051 using oBC345 and oBC122                                             | pBC133 | GGA |

|        |                                                                                                                                                        |        |     |
|--------|--------------------------------------------------------------------------------------------------------------------------------------------------------|--------|-----|
|        | Insert 243-3: oBC343 and oBC344 annealed                                                                                                               |        |     |
| pBC244 | Insert 244-1: PCR on pBC051 using oBC032 and oBC346<br>Insert 244-2: PCR on pBC051 using oBC349 and oBC122<br>Insert 244-3: oBC347 and oBC348 annealed | pBC133 | GGA |
| pBC245 | Insert 245-1: PCR on pBC243 using oBC271 and oBC340                                                                                                    | pBC108 | GGA |
| pBC246 | Insert 246-1: PCR on pBC244 using oBC271 and oBC340                                                                                                    | pBC108 | GGA |
| pBC247 | Insert 247-1: PCR on pBC156 using oBC032 and oBC341<br>Insert 247-2: PCR on pBC051 using oBC64 and oBC122                                              | pBC133 | GGA |
| pBC248 | Insert 248-1: PCR on pBC169 using oBC032 and oBC122                                                                                                    | pBC133 | GGA |
| pBC249 | Insert 249-1: PCR on pBC170 using oBC032 and oBC122                                                                                                    | pBC133 | GGA |

**Table S5:** Amycolimiditide variant core sequences.

| Name          | AA Substitutions     | Core Sequence                                                                                                                |
|---------------|----------------------|------------------------------------------------------------------------------------------------------------------------------|
| WT            |                      | HTDGQ <b>T</b> NT <b>V</b> TDGG <b>D</b> GRYTNK <b>D</b> SD <b>T</b> DH <b>R</b> ED                                          |
| I-null        | T10V, D21N           | HTDGQ <b>T</b> NT <b>V</b> DGG <b>D</b> GRYTNK <b>N</b> SD <b>T</b> DH <b>R</b> ED                                           |
| II-null       | T8V, D23N            | HTDGQ <b>T</b> N <b>V</b> TDGG <b>D</b> GRYTNK <b>D</b> S <b>N</b> T <b>D</b> H <b>R</b> ED                                  |
| III-null      | T6V, D25N            | HTDGQ <b>V</b> NT <b>V</b> TDGG <b>D</b> GRYTNK <b>D</b> SD <b>T</b> <b>N</b> H <b>R</b> ED                                  |
| IV-null       | T2V, D29N            | <b>H</b> V <b>D</b> GGQ <b>T</b> NT <b>V</b> TDGG <b>D</b> GRYTNK <b>D</b> SD <b>T</b> DH <b>R</b> <b>E</b> <b>N</b>         |
| II,III-null   | T6V, T8V, D23N, D25N | HTDGQ <b>V</b> N <b>V</b> TDGG <b>D</b> GRYTNK <b>D</b> S <b>N</b> T <b>N</b> H <b>R</b> ED                                  |
| II,IV-null    | T2V, T8V, D23N, D29N | <b>H</b> V <b>D</b> GGQ <b>T</b> N <b>V</b> TDGG <b>D</b> GRYTNK <b>D</b> S <b>N</b> T <b>D</b> H <b>R</b> <b>E</b> <b>N</b> |
|               | T8V                  | HTDGQ <b>T</b> N <b>V</b> TDGG <b>D</b> GRYTNK <b>D</b> SD <b>T</b> DH <b>R</b> ED                                           |
|               | T10V                 | HTDGQ <b>T</b> NT <b>V</b> DGG <b>D</b> GRYTNK <b>D</b> SD <b>T</b> DH <b>R</b> ED                                           |
|               | D21N                 | HTDGQ <b>T</b> NT <b>V</b> TDGG <b>D</b> GRYTNK <b>N</b> SD <b>T</b> DH <b>R</b> ED                                          |
|               | D23N                 | HTDGQ <b>T</b> NT <b>V</b> TDGG <b>D</b> GRYTNK <b>D</b> S <b>N</b> T <b>D</b> H <b>R</b> ED                                 |
|               | D25N                 | HTDGQ <b>T</b> NT <b>V</b> TDGG <b>D</b> GRYTNK <b>D</b> SD <b>T</b> <b>N</b> H <b>R</b> ED                                  |
| I-disulfide   | T10C, D21C           | HTDGQ <b>T</b> NT <b>V</b> <b>C</b> DGG <b>D</b> GRYTNK <b>C</b> SD <b>T</b> DH <b>R</b> ED                                  |
| II-disulfide  | T8C, D23C            | HTDGQ <b>T</b> N <b>C</b> VTDGG <b>D</b> GRYTNK <b>D</b> S <b>C</b> T <b>D</b> H <b>R</b> ED                                 |
| III-disulfide | T6C, D25C            | HTDGQ <b>C</b> NT <b>V</b> TDGG <b>D</b> GRYTNK <b>D</b> SD <b>T</b> <b>C</b> H <b>R</b> ED                                  |
| IV-disulfide  | T2C, D29C            | <b>H</b> <b>C</b> <b>D</b> GGQ <b>T</b> NT <b>V</b> TDGG <b>D</b> GRYTNK <b>D</b> SD <b>T</b> DH <b>R</b> <b>E</b> <b>C</b>  |
|               | D14N                 | HTDGQ <b>T</b> NT <b>V</b> TDGG <b>N</b> GRYTNK <b>D</b> SD <b>T</b> DH <b>R</b> ED                                          |
| D[DG]GGR      | G12D, D14G           | HTDGQ <b>T</b> NT <b>V</b> TD <b>D</b> <b>G</b> <b>G</b> GRYTNK <b>D</b> SD <b>T</b> DH <b>R</b> ED                          |
| DG[DG]GR      | G13D, D14G           | HTDGQ <b>T</b> NT <b>V</b> TD <b>D</b> <b>G</b> <b>G</b> GRYTNK <b>D</b> SD <b>T</b> DH <b>R</b> ED                          |
| DGGR[DG]      | D14R, G15D, R16G     | HTDGQ <b>T</b> NT <b>V</b> TDGG <b>R</b> <b>D</b> <b>G</b> YTNK <b>D</b> SD <b>T</b> DH <b>R</b> ED                          |
|               | G15A                 | HTDGQ <b>T</b> NT <b>V</b> TDGG <b>D</b> <b>A</b> RYTNK <b>D</b> SD <b>T</b> DH <b>R</b> ED                                  |
|               | G15T                 | HTDGQ <b>T</b> NT <b>V</b> TDGG <b>D</b> <b>T</b> RYTNK <b>D</b> SD <b>T</b> DH <b>R</b> ED                                  |
|               | G15S                 | HTDGQ <b>T</b> NT <b>V</b> TDGG <b>D</b> <b>S</b> RYTNK <b>D</b> SD <b>T</b> DH <b>R</b> ED                                  |
|               | +G16                 | HTDGQ <b>T</b> NT <b>V</b> TDGG <b>D</b> <b>G</b> RYTNK <b>D</b> SD <b>T</b> DH <b>R</b> ED                                  |
|               | +G14                 | HTDGQ <b>T</b> NT <b>V</b> TDGG <b>G</b> DGRYTNK <b>D</b> SD <b>T</b> DH <b>R</b> ED                                         |
|               | +G14+G16             | HTDGQ <b>T</b> NT <b>V</b> TDGG <b>G</b> <b>D</b> <b>G</b> GRYTNK <b>D</b> SD <b>T</b> DH <b>R</b> ED                        |

**Table S6:** Chemical shift assignments for amycolimiditide.

| RESIDUE | <sup>1</sup> H ATOM | CHEMICAL SHIFT (PPM) | <sup>13</sup> C ATOM | CHEMICAL SHIFT (PPM) |
|---------|---------------------|----------------------|----------------------|----------------------|
| HIS1    | H                   | 7.345                |                      |                      |
| HIS1    | HA                  | 4.507                | CA                   | 49.864               |
| HIS1    | HB2                 | 3.471                | CB                   | 26.381               |
| HIS1    | HB3                 | 3.373                |                      |                      |
| THR2    | H                   | 8.453                |                      |                      |
| THR2    | HA                  | 4.683                | CA                   | unresolved           |
| THR2    | HB                  | 5.280                | CB                   | 72.762               |
| THR2    | QG2                 | 1.163                | CG                   | 16.358               |
| ASP3    | H                   | 8.850                |                      |                      |
| ASP3    | HA                  | 4.996                | CA                   | 50.060               |
| ASP3    | HB2                 | 2.806                | CB                   | 36.557               |
| ASP3    | HB3                 | 2.649                |                      |                      |
| GLY4    | H                   | 8.374                |                      |                      |
| GLY4    | HA2                 | 4.233                | CA                   | 42.428               |
| GLY4    | HA3                 | 3.686                |                      |                      |
| GLN5    | H                   | 8.635                |                      |                      |
| GLN5    | HA                  | 4.585                | CA                   | unresolved           |
| GLN5    | QB                  | 1.984                | CB                   | 27.751               |
| GLN5    | QG                  | 2.258                | CG                   | 32.052               |
| THR6    | H                   | 8.092                |                      |                      |
| THR6    | HA                  | 4.664                | CA                   | unresolved           |
| THR6    | HB                  | 5.137                | CB                   | 72.955               |
| THR6    | QG2                 | 0.928                | CG                   | 16.206               |
| ASN7    | H                   | 8.993                |                      |                      |
| ASN7    | HA                  | 5.192                | CA                   | 50.255               |
| ASN7    | HB2                 | 2.728                | CB                   | 38.123               |
| ASN7    | HB3                 | 2.591                |                      |                      |
| THR8    | H                   | 8.120                |                      |                      |
| THR8    | HA                  | 4.742                | CA                   | unresolved           |
| THR8    | HB                  | 5.172                | CB                   | 72.892               |
| THR8    | QG2                 | 0.850                | CG                   | 18.378               |
| VAL9    | H                   | 8.854                |                      |                      |
| VAL9    | HA                  | 4.468                | CA                   | 58.866               |
| VAL9    | HB                  | 1.848                | CB                   | 31.469               |
| VAL9    | QQG                 | 0.870                | CG                   | 16.206               |
| THR10   | H                   | 7.996                |                      |                      |
| THR10   | HA                  | 4.644                | CA                   | unresolved           |
| THR10   | HB                  | 5.236                | CB                   | 72.368               |
| THR10   | QG2                 | 0.889                | CG                   | 18.554               |
| ASP11   | H                   | 8.873                |                      |                      |
| ASP11   | HA                  | 4.664                | CA                   | unresolved           |



|              |     |       |    |            |
|--------------|-----|-------|----|------------|
| <b>ASP11</b> | HB2 | 2.771 | CB | 35.773     |
| <b>ASP11</b> | HB3 | 2.757 |    |            |
| <b>GLY12</b> | H   | 8.178 |    |            |
| <b>GLY12</b> | HA2 | 3.901 | CA | 42.819     |
| <b>GLY12</b> | HA3 | 3.764 |    |            |
| <b>GLY13</b> | H   | 8.126 | C  | 171.484    |
| <b>GLY13</b> | QA  | 3.862 | CA | 42.036     |
| <b>ASP14</b> | H   | 8.572 | C  | 177.257    |
| <b>ASP14</b> | HA  | 4.583 | CA | 49.081     |
| <b>ASP14</b> | HB2 | 3.138 | CB | 34.600     |
| <b>ASP14</b> | HB3 | 2.747 | CO | 176.866    |
| <b>GLY15</b> | HA2 | 4.238 | C  | 168.745    |
| <b>GLY15</b> | HA3 | 4.205 | CA | 41.058     |
| <b>ARG16</b> | H   | 8.436 |    |            |
| <b>ARG16</b> | HA  | 4.018 | CA | 54.560     |
| <b>ARG16</b> | HB2 | 1.495 | CB | 27.360     |
| <b>ARG16</b> | HB3 | 1.451 |    |            |
| <b>ARG16</b> | QG  | 1.163 | CG | 23.837     |
| <b>ARG16</b> | QD  | 2.943 | CD | 40.471     |
| <b>ARG16</b> | HE  | 6.935 |    |            |
| <b>TYR17</b> | H   | 7.836 |    |            |
| <b>TYR17</b> | HA  | 4.527 | CA | 54.952     |
| <b>TYR17</b> | HB2 | 3.119 | CB | 35.579     |
| <b>TYR17</b> | HB3 | 2.825 |    |            |
| <b>TYR17</b> | QD  | 7.042 | CD | 130.490    |
| <b>TYR17</b> | QE  | 6.737 | CE | 115.421    |
| <b>THR18</b> | H   | 7.597 |    |            |
| <b>THR18</b> | HA  | 4.214 | CA | 58.866     |
| <b>THR18</b> | HB  | 4.077 | CB | 67.085     |
| <b>THR18</b> | QG2 | 1.026 | CG | 18.750     |
| <b>ASN19</b> | H   | 8.218 |    |            |
| <b>ASN19</b> | HA  | 4.644 | CA | unresolved |
| <b>ASN19</b> | HB2 | 2.720 | CB | 36.557     |
| <b>ASN19</b> | HB3 | 2.630 |    |            |
| <b>LYS20</b> | H   | 8.141 |    |            |
| <b>LYS20</b> | HA  | 4.468 | CA | 53.386     |
| <b>LYS20</b> | QB  | 1.652 | CB | 31.078     |
| <b>LYS20</b> | QG  | 1.359 | CG | 22.272     |
| <b>LYS20</b> | HD2 | 1.574 | CD | 26.376     |
| <b>LYS20</b> | HD3 | 1.535 |    |            |
| <b>LYS20</b> | QE  | 1.828 |    |            |
| <b>ASP21</b> | H   | 8.395 |    |            |
| <b>ASP21</b> | HA  | 4.898 | CA | 48.103     |

|              |     |       |    |            |
|--------------|-----|-------|----|------------|
| <b>ASP21</b> | HB2 | 3.256 | CB | 39.101     |
| <b>ASP21</b> | HB3 | 2.767 | CG | 168.940    |
| <b>SER22</b> | H   | 8.640 |    |            |
| <b>SER22</b> | HA  | 5.250 | CA | 54.365     |
| <b>SER22</b> | QB  | 3.784 | CB | 63.366     |
| <b>ASP23</b> | H   | 8.315 |    |            |
| <b>ASP23</b> | HA  | 4.820 | CA | 48.298     |
| <b>ASP23</b> | HB2 | 3.197 | CB | 39.297     |
| <b>ASP23</b> | HB3 | 2.627 | CG | 168.256    |
| <b>THR24</b> | H   | 8.534 |    |            |
| <b>THR24</b> | HA  | 5.113 | CA | 58.279     |
| <b>THR24</b> | HB  | 3.979 | CB | 69.237     |
| <b>THR24</b> | QG2 | 1.124 | CG | 19.141     |
| <b>ASP25</b> | H   | 8.532 |    |            |
| <b>ASP25</b> | HA  | 4.742 | CA | unresolved |
| <b>ASP25</b> | HB2 | 3.175 | CB | 39.297     |
| <b>ASP25</b> | HB3 | 2.571 | CG | 168.060    |
| <b>HIS26</b> | H   | 8.558 |    |            |
| <b>HIS26</b> | HA  | 5.270 | CA | 52.799     |
| <b>HIS26</b> | HB2 | 3.164 | CB | 28.730     |
| <b>HIS26</b> | HB3 | 2.884 |    |            |
| <b>ARG27</b> | H   | 8.671 |    |            |
| <b>ARG27</b> | HA  | 4.507 | CA | 52.212     |
| <b>ARG27</b> | QB  | 1.476 | CB | 30.099     |
| <b>ARG27</b> | HG2 | 1.261 | CG | 23.904     |
| <b>ARG27</b> | HG3 | 1.320 |    |            |
| <b>ARG27</b> | QD  | 3.001 | CD | 40.462     |
| <b>ARG27</b> | HE  | 7.013 |    |            |
| <b>GLU28</b> | H   | 8.580 |    |            |
| <b>GLU28</b> | HA  | 4.585 | CA | 53.191     |
| <b>GLU28</b> | HB2 | 1.887 | CB | 26.381     |
| <b>GLU28</b> | HB3 | 1.945 |    |            |
| <b>GLU28</b> | QG  | 2.395 | CG | 30.099     |
| <b>ASP29</b> | H   | 8.293 |    |            |
| <b>ASP29</b> | HA  | 4.527 | CA | 54.952     |
| <b>ASP29</b> | HB2 | 3.119 | CB | 38.318     |
| <b>ASP29</b> | HB3 | 2.610 | CG | 169.918    |

**Table S7:** Key proton chemical shifts of  $\omega$ -ester linkages of other graspetides.

|                                   | Asp $\beta$ or Glu $\gamma$ protons |       |       | Ser or Thr $\beta$ protons |       |       |
|-----------------------------------|-------------------------------------|-------|-------|----------------------------|-------|-------|
| Fuscimiditide <sup>7</sup>        | ASP-18                              | 2.734 | 3.165 | THR-3                      | 5.271 |       |
|                                   | ASP-22                              | 2.518 | 3.067 | THR-7                      | 5.096 |       |
| Marinostatin <sup>8</sup>         | ASP-9                               | 3.03  |       | THR-3                      | 5.57  |       |
|                                   | ASP-11                              | 2.69  | 2.76  | SER-8                      | 4.31  | 4.97  |
| Microviridin<br>1777 <sup>9</sup> | ASP-10                              | 2.63  | 2.77  | THR-4                      | 5.33  |       |
|                                   | GLU-12                              | 1.33  | 2.08  | SER-9                      | 4.2   | 4.54  |
| Marinomonsin <sup>10</sup>        | ASP-14                              | 2.88  | 3.29  | THR-4                      | 5.34  |       |
| Microviridin J <sup>11</sup>      | ASP-10                              | 2.59  | 2.68  | THR-4                      | 5.34  |       |
|                                   | GLU-12                              | 1.3   | 2.05  | SER-9                      | 4.12  |       |
| Thatisin <sup>12</sup>            | ASP-13                              | 2.61  | 2.68  | THR-5                      | 5.05  |       |
|                                   | ASP-17                              | 2.78  | 3.16  | THR-8                      | 4.42  |       |
| BMRB average*                     | ASP                                 | 2.666 | 2.716 | SER                        | 3.844 | 3.868 |
|                                   | GLU                                 | 2.246 | 2.264 | THR                        | 4.169 |       |

\* The average chemical shift values reported in BMRB, Jul. 7, 2022

**Table S8:** Vicinal amide-alpha proton  $^3J_{\text{HN}\alpha}$  coupling constants

| Residue | $^3J_{\text{HN}\alpha}$ (Hz) |
|---------|------------------------------|
| ASP-3   | 7.71                         |
| THR-6   | 9.67                         |
| ASN-7   | 8.80                         |
| VAL-9   | 7.84                         |
| THR-10  | 9.79                         |
| ASP-11  | 7.60                         |
| ARG-16  | 5.09                         |
| TYR-17  | 7.71                         |
| THR-18  | 7.34                         |
| ASN-19  | 6.96                         |
| ASP-21  | 9.15                         |
| ASP-23  | 8.21                         |
| THR-24  | 7.65                         |
| ARG-27  | 8.38                         |
| ASP-29  | 8.51                         |

**Table S9:** MS/MS on the hydrazinolyzed core peptide with one hydrazide adduct

| ions            | error (ppm) | charge | number of hydrazide adducts |
|-----------------|-------------|--------|-----------------------------|
| b <sub>2</sub>  | -7.5        | 1      | 0                           |
| b <sub>3</sub>  | -0.2        | 1      | 0                           |
| b <sub>5</sub>  | 1.7         | 1      | 0                           |
| b <sub>6</sub>  | -2.1        | 1      | 0                           |
| b <sub>7</sub>  | -1.2        | 1      | 0                           |
| b <sub>8</sub>  | 6.5         | 2      | 0                           |
| b <sub>23</sub> | 4.7         | 4      | 1                           |
| y <sub>23</sub> | 0.6         | 3      | 1                           |
| y <sub>22</sub> | 0.2         | 3      | 1                           |
| y <sub>21</sub> | -1.6        | 3      | 1                           |
| y <sub>20</sub> | -1.2        | 3      | 1                           |
| y <sub>19</sub> | 0.4         | 3      | 1                           |
| y <sub>18</sub> | -2.7        | 3      | 1                           |
| y <sub>15</sub> | -5.1        | 3      | 1                           |
| y <sub>8</sub>  | -4.0        | 1      | 0                           |
| y <sub>6</sub>  | -0.5        | 1      | 0                           |
| y <sub>4</sub>  | -3.6        | 1      | 0                           |

**Table S10:** MS/MS on the hydrazinolyzed core peptide with two hydrazide adducts

| ions            | error (ppm) | charge | number of hydrazide adducts |
|-----------------|-------------|--------|-----------------------------|
| b <sub>2</sub>  | -4.2        | 1      | 0                           |
| b <sub>4</sub>  | 2.6         | 1      | 0                           |
| b <sub>5</sub>  | -1.0        | 1      | 0                           |
| b <sub>6</sub>  | -1.7        | 1      | 0                           |
| b <sub>7</sub>  | -1.1        | 1      | 0                           |
| b <sub>8</sub>  | -0.8        | 1      | 0                           |
| b <sub>8</sub>  | 1.4         | 2      | 0                           |
| b <sub>23</sub> | -1.5        | 4      | 2                           |
| y <sub>23</sub> | -3.3        | 3      | 2                           |
| y <sub>22</sub> | -4.1        | 3      | 2                           |
| y <sub>21</sub> | -3.3        | 3      | 2                           |
| y <sub>20</sub> | 0.3         | 3      | 2                           |
| y <sub>19</sub> | -5.0        | 3      | 2                           |
| y <sub>18</sub> | -2.6        | 3      | 2                           |
| y <sub>15</sub> | 1.0         | 3      | 2                           |
| y <sub>8</sub>  | 0.1         | 1      | 1                           |
| y <sub>6</sub>  | -1.3        | 1      | 0                           |
| y <sub>4</sub>  | 0.0         | 1      | 0                           |

**Table S11:** MS/MS on the hydrazinolyzed core peptide with three hydrazide adducts

| <b>ions</b>     | <b>error (ppm)</b> | <b>charge</b> | <b>number of hydrazide adducts</b> |
|-----------------|--------------------|---------------|------------------------------------|
| b <sub>3</sub>  | -2                 | 1             | 0                                  |
| b <sub>5</sub>  | -5.4               | 1             | 0                                  |
| b <sub>6</sub>  | -6.4               | 2             | 0                                  |
| b <sub>7</sub>  | -12.9              | 1             | 0                                  |
| b <sub>8</sub>  | -9.9               | 1             | 0                                  |
| b <sub>8</sub>  | 2.1                | 2             | 0                                  |
| b <sub>9</sub>  | 0.2                | 1             | 0                                  |
| b <sub>10</sub> | 10.2               | 1             | 0                                  |
| y <sub>23</sub> | -6.1               | 3             | 3                                  |
| y <sub>20</sub> | -5.5               | 3             | 3                                  |
| y <sub>18</sub> | -3.4               | 3             | 3                                  |
| y <sub>8</sub>  | 0.9                | 1             | 2                                  |
| y <sub>4</sub>  | -4.8               | 1             | 0                                  |

**Table S12:** MS/MS on the hydrazinolized II-null variant core peptide

| <b>ions</b>     | <b>error (ppm)</b> | <b>charge</b> | <b>number of hydrazide adducts</b> |
|-----------------|--------------------|---------------|------------------------------------|
| b <sub>2</sub>  | -7.1               | 1             | 0                                  |
| b <sub>3</sub>  | -10.8              | 1             | 0                                  |
| b <sub>5</sub>  | -3.7               | 1             | 0                                  |
| b <sub>6</sub>  | -5.5               | 1             | 0                                  |
| b <sub>7</sub>  | -6.0               | 1             | 0                                  |
| b <sub>7</sub>  | -8.9               | 2             | 0                                  |
| b <sub>8</sub>  | -6.2               | 1             | 0                                  |
| b <sub>8</sub>  | -4.4               | 2             | 0                                  |
| b <sub>9</sub>  | -7.7               | 1             | 0                                  |
| b <sub>11</sub> | -8.6               | 1             | 0                                  |
| b <sub>19</sub> | -1.5               | 2             | 0                                  |
| b <sub>20</sub> | -6.4               | 2             | 0                                  |
| b <sub>21</sub> | -6.6               | 3             | 1                                  |
| b <sub>22</sub> | 1.4                | 3             | 1                                  |
| b <sub>25</sub> | 0.6                | 3             | 2                                  |
| y <sub>28</sub> | -8.1               | 3             | 3                                  |
| y <sub>27</sub> | -8.0               | 3             | 3                                  |
| y <sub>26</sub> | -12.6              | 3             | 3                                  |
| y <sub>21</sub> | -6.1               | 2             | 3                                  |
| y <sub>21</sub> | -5.9               | 3             | 3                                  |
| y <sub>20</sub> | -6.1               | 2             | 3                                  |
| y <sub>20</sub> | -8.3               | 3             | 3                                  |
| y <sub>19</sub> | -8.3               | 2             | 3                                  |
| y <sub>18</sub> | -8.8               | 2             | 3                                  |
| y <sub>18</sub> | -6.0               | 3             | 3                                  |
| y <sub>15</sub> | -7.8               | 2             | 3                                  |
| y <sub>15</sub> | -6.2               | 3             | 3                                  |
| y <sub>9</sub>  | -7.5               | 1             | 3                                  |
| y <sub>9</sub>  | -11.4              | 2             | 3                                  |
| y <sub>8</sub>  | -7.9               | 1             | 2                                  |
| y <sub>8</sub>  | -5.9               | 2             | 2                                  |
| y <sub>7</sub>  | -11.9              | 1             | 2                                  |
| y <sub>5</sub>  | -11.0              | 1             | 2                                  |
| y <sub>4</sub>  | -6.4               | 1             | 1                                  |
| y <sub>3</sub>  | -10.6              | 1             | 1                                  |

**Table S13:** MS/MS on the hydrazinolized III-null variant core peptide

| <b>ions</b>     | <b>error (ppm)</b> | <b>charge</b> | <b>number of hydrazide adducts</b> |
|-----------------|--------------------|---------------|------------------------------------|
| b <sub>2</sub>  | -4.7               | 1             | 0                                  |
| b <sub>4</sub>  | -1.0               | 1             | 0                                  |
| b <sub>5</sub>  | -2.2               | 1             | 0                                  |
| b <sub>6</sub>  | -2.6               | 1             | 0                                  |
| b <sub>6</sub>  | -2.9               | 2             | 0                                  |
| b <sub>7</sub>  | -2.7               | 1             | 0                                  |
| b <sub>7</sub>  | -2.5               | 2             | 0                                  |
| b <sub>8</sub>  | -2.5               | 1             | 0                                  |
| b <sub>8</sub>  | -0.9               | 2             | 0                                  |
| b <sub>9</sub>  | -5.2               | 1             | 0                                  |
| b <sub>9</sub>  | -8.4               | 2             | 0                                  |
| b <sub>10</sub> | -0.7               | 2             | 0                                  |
| b <sub>23</sub> | -12.2              | 3             | 2                                  |
| b <sub>25</sub> | 2.5                | 3             | 2                                  |
| y <sub>24</sub> | -7.3               | 3             | 2                                  |
| y <sub>23</sub> | -2.1               | 3             | 2                                  |
| y <sub>23</sub> | -7.0               | 4             | 2                                  |
| y <sub>22</sub> | -1.9               | 3             | 2                                  |
| y <sub>21</sub> | -1.7               | 3             | 2                                  |
| y <sub>21</sub> | -4.1               | 4             | 2                                  |
| y <sub>20</sub> | -3.9               | 2             | 2                                  |
| y <sub>20</sub> | -1.5               | 3             | 2                                  |
| y <sub>20</sub> | -1.1               | 4             | 2                                  |
| y <sub>19</sub> | -4.3               | 2             | 2                                  |
| y <sub>19</sub> | -1.5               | 3             | 2                                  |
| y <sub>18</sub> | -2.7               | 2             | 2                                  |
| y <sub>18</sub> | -1.1               | 3             | 2                                  |
| y <sub>16</sub> | 3.6                | 3             | 2                                  |
| y <sub>15</sub> | -3.7               | 2             | 2                                  |
| y <sub>15</sub> | 0.2                | 3             | 2                                  |
| y <sub>9</sub>  | -4.6               | 1             | 2                                  |
| y <sub>9</sub>  | -1.7               | 2             | 2                                  |
| y <sub>8</sub>  | -2.9               | 1             | 1                                  |
| y <sub>8</sub>  | -4.7               | 2             | 1                                  |
| y <sub>7</sub>  | -3.9               | 1             | 1                                  |
| y <sub>6</sub>  | -2.5               | 1             | 0                                  |
| y <sub>6</sub>  | -1.1               | 2             | 0                                  |
| y <sub>5</sub>  | 11.3               | 1             | 0                                  |
| y <sub>5</sub>  | -10.7              | 2             | 0                                  |
| y <sub>4</sub>  | -3.9               | 1             | 0                                  |

**Table S14:** MS/MS on the hydrazinolyzed IV-null variant core peptide

| <b>ions</b>     | <b>error (ppm)</b> | <b>charge</b> | <b>number of hydrazide adducts</b> |
|-----------------|--------------------|---------------|------------------------------------|
| b <sub>2</sub>  | -3.5               | 1             | 0                                  |
| b <sub>5</sub>  | -0.7               | 1             | 0                                  |
| b <sub>7</sub>  | -5.5               | 1             | 0                                  |
| b <sub>8</sub>  | -0.4               | 1             | 0                                  |
| b <sub>8</sub>  | -2.5               | 2             | 0                                  |
| b <sub>9</sub>  | -0.9               | 1             | 0                                  |
| b <sub>10</sub> | -5.0               | 2             | 0                                  |
| b <sub>11</sub> | -8.3               | 1             | 0                                  |
| b <sub>20</sub> | -8.6               | 2             | 0                                  |
| b <sub>21</sub> | -5.5               | 3             | 1                                  |
| b <sub>23</sub> | 5.5                | 3             | 2                                  |
| b <sub>25</sub> | -3.3               | 3             | 3                                  |
| y <sub>28</sub> | 1.4                | 3             | 3                                  |
| y <sub>27</sub> | -2.4               | 3             | 3                                  |
| y <sub>26</sub> | 11.4               | 3             | 3                                  |
| y <sub>20</sub> | -0.9               | 2             | 3                                  |
| y <sub>20</sub> | -8.1               | 3             | 3                                  |
| y <sub>19</sub> | -3.7               | 2             | 3                                  |
| y <sub>18</sub> | -6.7               | 2             | 3                                  |
| y <sub>18</sub> | -1.5               | 3             | 3                                  |
| y <sub>15</sub> | -2.9               | 2             | 3                                  |
| y <sub>15</sub> | -5.6               | 3             | 3                                  |
| y <sub>9</sub>  | -14.7              | 2             | 3                                  |
| y <sub>8</sub>  | -2.9               | 1             | 2                                  |
| y <sub>8</sub>  | -1.5               | 2             | 2                                  |
| y <sub>6</sub>  | -6.7               | 1             | 1                                  |
| y <sub>5</sub>  | -4.0               | 1             | 1                                  |
| y <sub>4</sub>  | -1.2               | 1             | 0                                  |



**Table S15:** MS/MS on the hydrazinolyzed II,III-null variant core peptide

| <b>ions</b>     | <b>error (ppm)</b> | <b>charge</b> | <b>number of hydrazide adducts</b> |
|-----------------|--------------------|---------------|------------------------------------|
| b <sub>2</sub>  | -11.8              | 1             | 0                                  |
| b <sub>3</sub>  | -1.8               | 1             | 0                                  |
| b <sub>5</sub>  | -11.9              | 1             | 0                                  |
| b <sub>6</sub>  | -13.8              | 1             | 0                                  |
| b <sub>7</sub>  | -11.5              | 2             | 0                                  |
| b <sub>8</sub>  | -11.5              | 1             | 0                                  |
| b <sub>8</sub>  | -14.5              | 2             | 0                                  |
| b <sub>9</sub>  | -13.5              | 1             | 0                                  |
| b <sub>10</sub> | -5.3               | 2             | 0                                  |
| b <sub>14</sub> | -12.8              | 1             | 0                                  |
| y <sub>27</sub> | -11.2              | 3             | 1                                  |
| y <sub>26</sub> | -12.4              | 3             | 1                                  |
| y <sub>23</sub> | -12.8              | 2             | 1                                  |
| y <sub>21</sub> | -10.1              | 3             | 1                                  |
| y <sub>20</sub> | -14.9              | 2             | 1                                  |
| y <sub>19</sub> | -10.3              | 2             | 1                                  |
| y <sub>18</sub> | -13.6              | 2             | 1                                  |
| y <sub>17</sub> | -12.6              | 2             | 1                                  |
| y <sub>10</sub> | -11.5              | 2             | 1                                  |
| y <sub>9</sub>  | -9.8               | 1             | 1                                  |
| y <sub>9</sub>  | -10.4              | 2             | 1                                  |
| y <sub>8</sub>  | -11.6              | 1             | 0                                  |
| y <sub>7</sub>  | -12.0              | 1             | 0                                  |
| y <sub>5</sub>  | -12.0              | 1             | 0                                  |
| y <sub>3</sub>  | -13.8              | 1             | 0                                  |

**Table S16:** MS/MS on the hydrazinolized II,IV-null variant core peptide

| <b>ions</b>     | <b>error (ppm)</b> | <b>charge</b> | <b>number of hydrazide adducts</b> |
|-----------------|--------------------|---------------|------------------------------------|
| b <sub>2</sub>  | -1.8               | 1             | 0                                  |
| b <sub>3</sub>  | -0.9               | 1             | 0                                  |
| b <sub>4</sub>  | -2.1               | 1             | 0                                  |
| b <sub>5</sub>  | -0.9               | 1             | 0                                  |
| b <sub>5</sub>  | -6.2               | 2             | 0                                  |
| b <sub>6</sub>  | -1.7               | 1             | 0                                  |
| b <sub>6</sub>  | -1.5               | 2             | 0                                  |
| b <sub>7</sub>  | -0.9               | 1             | 0                                  |
| b <sub>7</sub>  | -0.6               | 2             | 0                                  |
| b <sub>8</sub>  | -0.8               | 1             | 0                                  |
| b <sub>8</sub>  | 3.0                | 2             | 0                                  |
| b <sub>9</sub>  | -4.9               | 1             | 0                                  |
| b <sub>9</sub>  | -0.9               | 2             | 0                                  |
| b <sub>10</sub> | -2.1               | 2             | 0                                  |
| y <sub>24</sub> | -3.6               | 3             | 2                                  |
| y <sub>23</sub> | -1.4               | 3             | 2                                  |
| y <sub>22</sub> | -2.7               | 3             | 2                                  |
| y <sub>21</sub> | -1.6               | 3             | 2                                  |
| y <sub>21</sub> | -0.5               | 4             | 2                                  |
| y <sub>20</sub> | -3.5               | 2             | 2                                  |
| y <sub>20</sub> | -1.9               | 3             | 2                                  |
| y <sub>20</sub> | -3.4               | 4             | 2                                  |
| y <sub>19</sub> | -1.7               | 2             | 2                                  |
| y <sub>19</sub> | -2.4               | 3             | 2                                  |
| y <sub>18</sub> | -1.7               | 2             | 2                                  |
| y <sub>18</sub> | -1.6               | 3             | 2                                  |
| y <sub>17</sub> | -2.9               | 3             | 2                                  |
| y <sub>15</sub> | -3.1               | 2             | 2                                  |
| y <sub>15</sub> | -3.6               | 3             | 2                                  |
| y <sub>9</sub>  | -2.5               | 1             | 2                                  |
| y <sub>9</sub>  | -5.7               | 2             | 2                                  |
| y <sub>8</sub>  | -2.4               | 1             | 1                                  |
| y <sub>8</sub>  | 0.3                | 2             | 1                                  |
| y <sub>7</sub>  | 0.5                | 1             | 1                                  |
| y <sub>6</sub>  | -3.7               | 1             | 1                                  |
| y <sub>5</sub>  | -5.5               | 1             | 1                                  |
| y <sub>4</sub>  | -2.2               | 1             | 0                                  |
| y <sub>3</sub>  | -7.1               | 1             | 0                                  |

## References for Supplemental Information

1. Crooks, G. E.; Hon, G.; Chandonia, J. M.; Brenner, S. E., WebLogo: a sequence logo generator. *Genome Res* **2004**, *14* (6), 1188-90.
2. Apostol, I.; Aitken, J.; Levine, J.; Lippincott, J.; Davidson, J. S.; Abbott-Brown, D., Recombinant protein sequences can trigger methylation of N-terminal amino acids in *Escherichia coli*. *Protein Sci* **1995**, *4* (12), 2616-8.
3. Butt, T. R.; Edavettal, S. C.; Hall, J. P.; Mattern, M. R., SUMO fusion technology for difficult-to-express proteins. *Protein Expr Purif* **2005**, *43* (1), 1-9.
4. Hirel, P. H.; Schmitter, M. J.; Dessen, P.; Fayat, G.; Blanquet, S., Extent of N-terminal methionine excision from *Escherichia coli* proteins is governed by the side-chain length of the penultimate amino acid. *Proc Natl Acad Sci U S A* **1989**, *86* (21), 8247-51.
5. Cheung-Lee, W. L.; Cao, L.; Link, A. J., Pandonodin: A Proteobacterial Lasso Peptide with an Exceptionally Long C-Terminal Tail. *ACS Chem Biol* **2019**, *14* (12), 2783-2792.
6. Lee, M. E.; DeLoache, W. C.; Cervantes, B.; Dueber, J. E., A Highly Characterized Yeast Toolkit for Modular, Multipart Assembly. *ACS Synth Biol* **2015**, *4* (9), 975-86.
7. Elashal, H. E.; Koos, J. D.; Cheung-Lee, W. L.; Choi, B.; Cao, L.; Richardson, M. A.; White, H. L.; Link, A. J., Update CITATION. **2021**.
8. Kanaori, K.; Kamei, K.; Taniguchi, M.; Koyama, T.; Yasui, T.; Takano, R.; Imada, C.; Tajima, K.; Hara, S., Solution structure of marinostatin, a natural ester-linked protein protease inhibitor. *Biochemistry* **2005**, *44* (7), 2462-8.
9. Sieber, S.; Grendelmeier, S. M.; Harris, L. A.; Mitchell, D. A.; Gademann, K., Microviridin 1777: A Toxic Chymotrypsin Inhibitor Discovered by a Metabologenomic Approach. *J Nat Prod* **2020**, *83* (2), 438-446.
10. Kaweewan, I.; Nakagawa, H.; Kodani, S., Heterologous expression of a cryptic gene cluster from *Marinomonas fungiae* affords a novel tricyclic peptide marinomonasin. *Appl Microbiol Biotechnol* **2021**, *105* (19), 7241-7250.
11. Rohrlack, T.; Christoffersen, K.; Hansen, P. E.; Zhang, W.; Czarnecki, O.; Henning, M.; Fastner, J.; Erhard, M.; Neilan, B. A.; Kaebnick, M., Isolation, characterization, and quantitative analysis of Microviridin J, a new *Microcystis* metabolite toxic to *Daphnia*. *J Chem Ecol* **2003**, *29* (8), 1757-70.
12. Ramesh, S.; Guo, X.; DiCaprio, A. J.; De Lio, A. M.; Harris, L. A.; Kille, B. L.; Pogorelov, T. V.; Mitchell, D. A., Bioinformatics-Guided Expansion and Discovery of Graspptides. *ACS Chem Biol* **2021**, *16* (12), 2787-2797.
